# Supplementary material
Source: PubMed Central journal article supplement (PMC2974822)
Supplement: pro0019-1296-SD1.pdf [file pro0019-1296-SD1.pdf]

# 1 SUPPLEMENTARY MATERIAL

The rvET optimized alignments when input into ivET or Shannon Entropy ranking method increased the average z-score  $\langle z_o \rangle$  of functional overlap from 2.98 to 3.45 (16%) and from 3.61 to 3.82 (6%), respectively (see Figure 1). The ivET and Shannon Entropy optimized sequence selections also triggered improvements in rvET, but these were quite slight (1-4%). This may be explained by the intrinsic robustness of rvET compared to the coarseness of ivET and Shannon Entropy methods.

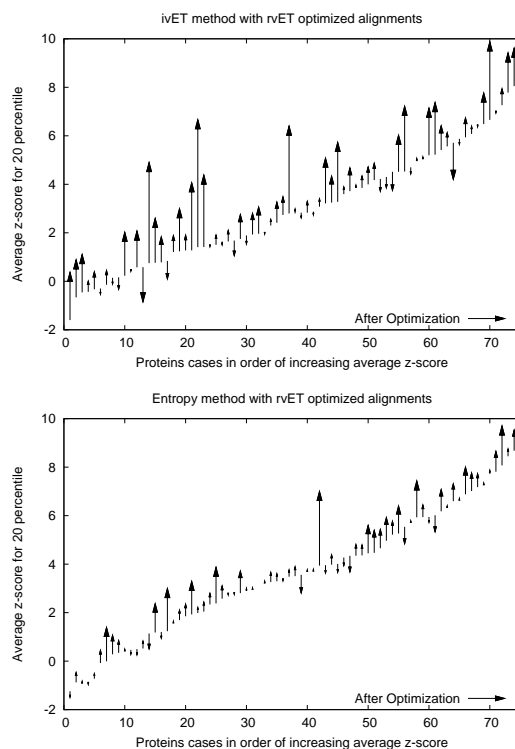

Figure 1: The ivET and Shannon Entropy ranking methods were tested on the rvET optimized alignments. The sequence selection optimization using the rvET also helps the control methods improve site prediction.

| Testset 1 |             | Number of sequences |       |             |           |
|-----------|-------------|---------------------|-------|-------------|-----------|
| PDBID     | unoptimized | optimized           | PDBID | unoptimized | optimized |
| 16pk      | 492         | 132                 | 1dam  | 462         | 119       |
| 1a09      | 295         | 179                 | 1dig  | 467         | 207       |
| 1a0oE     | 481         | 136                 | 1dqr  | 467         | 169       |
| 1a22A     | 319         | 137                 | 1dqx  | 152         | 81        |
| 1a22B     | 141         | 49                  | 1e96A | 439         | 144       |
| 1a2kA     | 124         | 77                  | 1e96B | 62          | 41        |
| 1a2kD     | 424         | 218                 | 1ee9  | 164         | 109       |
| 1a3k      | 349         | 127                 | 1efaB | 470         | 73        |
| 1a48      | 425         | 121                 | 1eg2  | 264         | 85        |
| 1a4mA     | 295         | 89                  | 1eje  | 126         | 81        |
| 1a53      | 468         | 145                 | 1elrA | 385         | 182       |
| 1a59      | 478         | 216                 | 1elwA | 406         | 137       |
| 1a6m      | 344         | 212                 | 1f6mA | 488         | 180       |
| 1a6q      | 238         | 162                 | 1f88A | 260         | 118       |
| 1a80      | 482         | 199                 | 1finA | 444         | 163       |
| 1aca      | 352         | 219                 | 1finB | 417         | 204       |
| 1ad3A     | 459         | 224                 | 1fjmA | 422         | 167       |
| 1ai2      | 350         | 192                 | 1fqjB | 281         | 133       |
| 1aj2      | 471         | 143                 | 1gnjA | 92          | 41        |
| 1aj8A     | 475         | 181                 | 1jfiB | 133         | 74        |
| 1aky      | 454         | 226                 | 1k7vA | 206         | 87        |
| 1am1      | 354         | 156                 | 1ng1  | 464         | 204       |
| 1amk      | 416         | 148                 | 1nzcA | 478         | 120       |
| 1aonF     | 475         | 261                 | 1pvdA | 239         | 127       |
| 1ars      | 388         | 162                 | 1qumA | 310         | 133       |
| 1aru      | 93          | 49                  | 1qupA | 47          | 34        |
| 1ast      | 366         | 125                 | 1rrpA | 411         | 196       |
| 1axn      | 441         | 157                 | 1rrpB | 207         | 99        |
| 1b54      | 483         | 94                  | 1vh4A | 243         | 116       |
| 1bag      | 41          | 24                  | 1w1uA | 319         | 170       |
| 1bqk      | 63          | 42                  | 1ycsA | 112         | 60        |
| 1bto      | 490         | 184                 | 1ycsB | 57          | 49        |
| 1c1bA     | 474         | 301                 | 2bif  | 253         | 96        |
| 1cg0      | 479         | 244                 | 2mjpA | 488         | 325       |
| 1cio      | 396         | 220                 | 2msbA | 298         | 142       |
| 1cvjA     | 310         | 139                 | 3hhrA | 339         | 173       |
| 1cxzA     | 446         | 176                 | 6gst  | 361         | 113       |

Table 1: The change in sequence count for training set due to the optimization is shown.

| Testset 2 |             | Number of sequences |       |             |           |
|-----------|-------------|---------------------|-------|-------------|-----------|
| PDBID     | unoptimized | optimized           | PDBID | unoptimized | optimized |
| 1aa6      | 438         | 193                 | 1fca  | 428         | 138       |
| 1aac      | 126         | 89                  | 1ffh  | 465         | 188       |
| 1ah7      | 29          | 24                  | 1fit  | 170         | 98        |
| 1ako      | 480         | 166                 | 1fnc  | 200         | 124       |
| 1amj      | 255         | 135                 | 1fsu  | 182         | 69        |
| 1apq      | 254         | 127                 | 1fxd  | 24          | 19        |
| 1arv      | 89          | 56                  | 1gai  | 79          | 61        |
| 1at0      | 82          | 64                  | 1gcb  | 151         | 68        |
| 1ayl      | 417         | 179                 | 1gpl  | 192         | 100       |
| 1bdb      | 482         | 196                 | 1han  | 153         | 91        |
| 1bia      | 225         | 114                 | 1htn  | 219         | 111       |
| 1bif      | 240         | 118                 | 1hyt  | 323         | 96        |
| 1bip      | 64          | 41                  | 1iba  | 130         | 67        |
| 1bor      | 26          | 19                  | 1ido  | 280         | 110       |
| 1btl      | 449         | 201                 | 1ig5  | 51          | 28        |
| 1cfb      | 183         | 96                  | 1iyu  | 335         | 127       |
| 1chc      | 93          | 49                  | 1krn  | 190         | 92        |
| 1chd      | 457         | 164                 | 1lam  | 406         | 240       |
| 1csh      | 200         | 119                 | 1lay  | 31          | 23        |
| 1ctn      | 145         | 58                  | 1lcf  | 191         | 93        |
| 1ctt      | 79          | 51                  | 1led  | 349         | 123       |
| 1cvl      | 116         | 67                  | 1lgr  | 455         | 180       |
| 1def      | 474         | 180                 | 1lml  | 178         | 74        |
| 1drw      | 469         | 225                 | 1mla  | 487         | 177       |
| 1dxy      | 449         | 176                 | 1mup  | 86          | 41        |
| 1e70      | 449         | 186                 | 1nif  | 37          | 31        |
| 1ecl      | 473         | 171                 | 1nir  | 34          | 27        |
| 1emn      | 1277        | 36                  | 1nox  | 49          | 27        |
| 1esl      | 73          | 39                  | 1onc  | 43          | 25        |
| 1far      | 81          | 32                  | 1opc  | 422         | 125       |

Table 2: The change in sequence count for testset due to the optimization is shown.

| Testset 2 |             | Number of sequences |       |             |           |
|-----------|-------------|---------------------|-------|-------------|-----------|
| PDBID     | unoptimized | optimized           | PDBID | unoptimized | optimized |
| 1osa      | 397         | 204                 | 1vii  | 47          | 40        |
| 1pbn      | 331         | 144                 | 1vsd  | 190         | 56        |
| 1pda      | 458         | 211                 | 1whi  | 493         | 188       |
| 1pdc      | 218         | 147                 | 1xnb  | 243         | 115       |
| 1pii      | 156         | 84                  | 2abk  | 488         | 203       |
| 1pkp      | 465         | 233                 | 2ace  | 409         | 139       |
| 1poa      | 379         | 149                 | 2af8  | 46          | 35        |
| 1poc      | 38          | 30                  | 2asi  | 306         | 96        |
| 1pth      | 83          | 53                  | 2cba  | 376         | 151       |
| 1put      | 443         | 124                 | 2cmd  | 281         | 147       |
| 1qli      | 326         | 115                 | 2dkb  | 391         | 209       |
| 1rfs      | 72          | 56                  | 2dlr  | 447         | 146       |
| 1rie      | 395         | 179                 | 2fha  | 399         | 165       |
| 1rnl      | 487         | 262                 | 2hft  | 32          | 25        |
| 1se4      | 87          | 44                  | 2rn2  | 479         | 125       |
| 1snc      | 164         | 61                  | 2sil  | 48          | 23        |
| 1sp2      | 164         | 128                 | 2vil  | 286         | 215       |
| 1sra      | 63          | 44                  | 3dni  | 110         | 58        |
| 1thg      | 285         | 106                 | 3ebx  | 176         | 54        |
| 1thm      | 441         | 358                 | 3ssi  | 31          | 26        |
| 1thx      | 483         | 271                 | 4enl  | 446         | 179       |
| 1tmy      | 460         | 305                 | 4rhn  | 474         | 205       |
| 1uch      | 165         | 62                  | 5eat  | 409         | 147       |
| 1uxc      | 130         | 82                  | 5ptp  | 417         | 139       |
| 1vhh      | 66          | 33                  | 7rsa  | 341         | 114       |

Table 3: The change in sequence count for testset due to the optimization is shown.

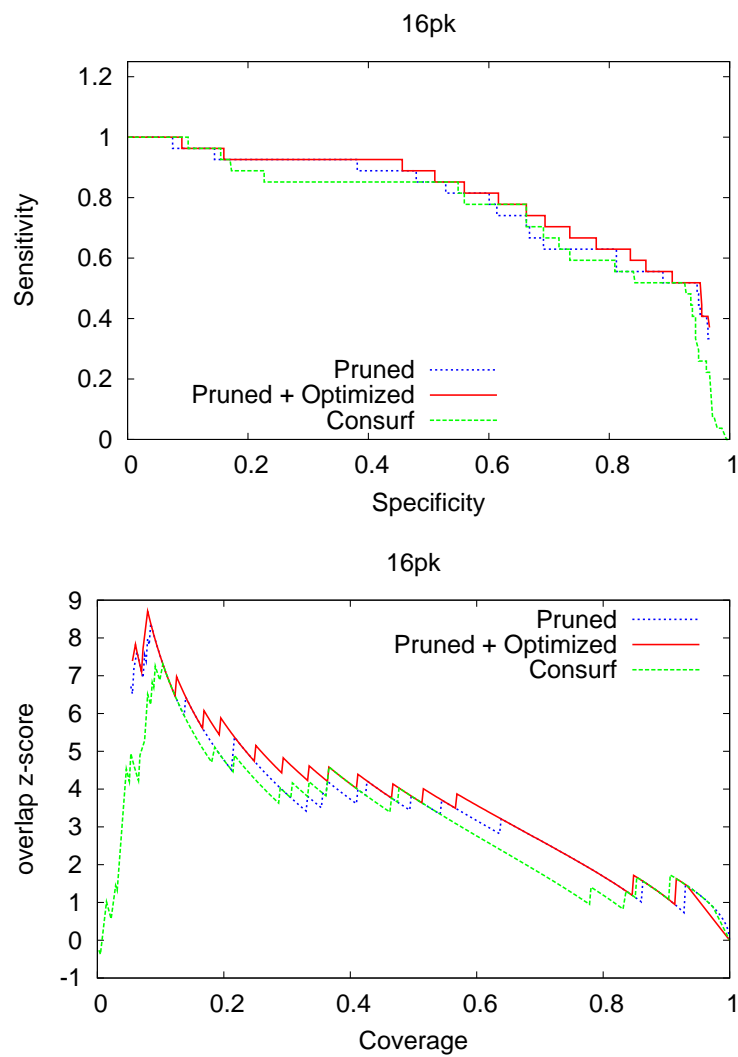

Figure 2: a) The sensitivity and specificity is shown for the pruned, pruned + optimized and the comparison method Consurf for PDBID 16pk. b) The overlap z-scores as a function of coverage for the three methods is shown.

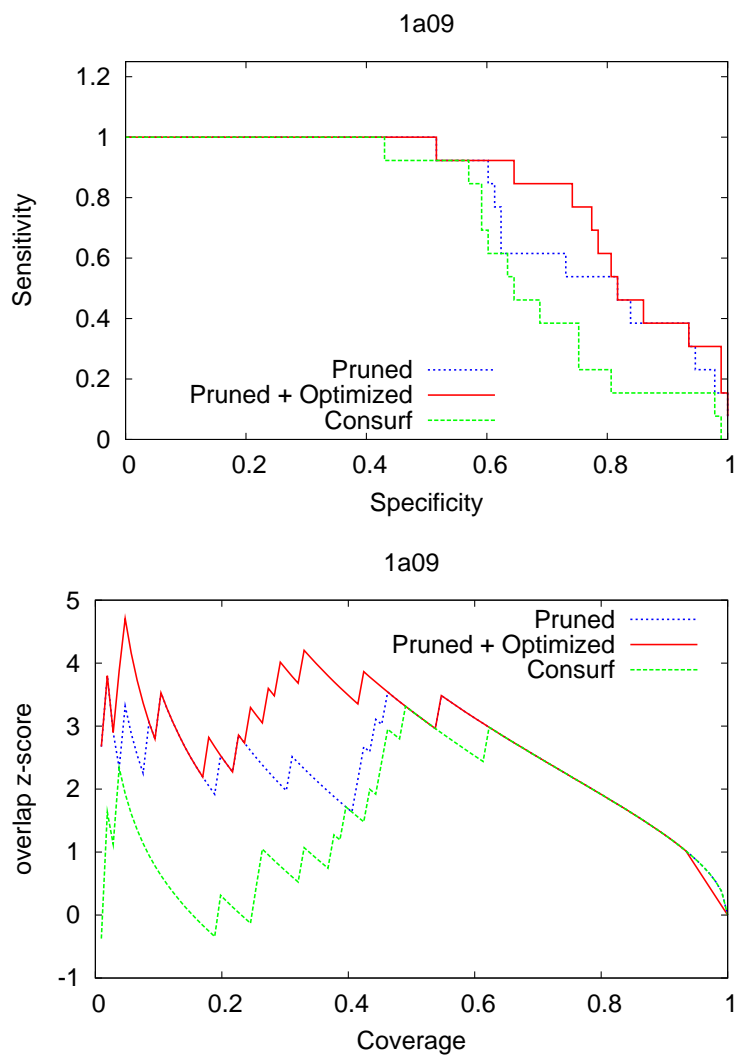

Figure 3: a) The sensitivity and specificity is shown for the pruned, pruned + optimized and the comparison method Consurf for PDBID 1a09. b) The overlap z-scores as a function of coverage for the three methods is shown.

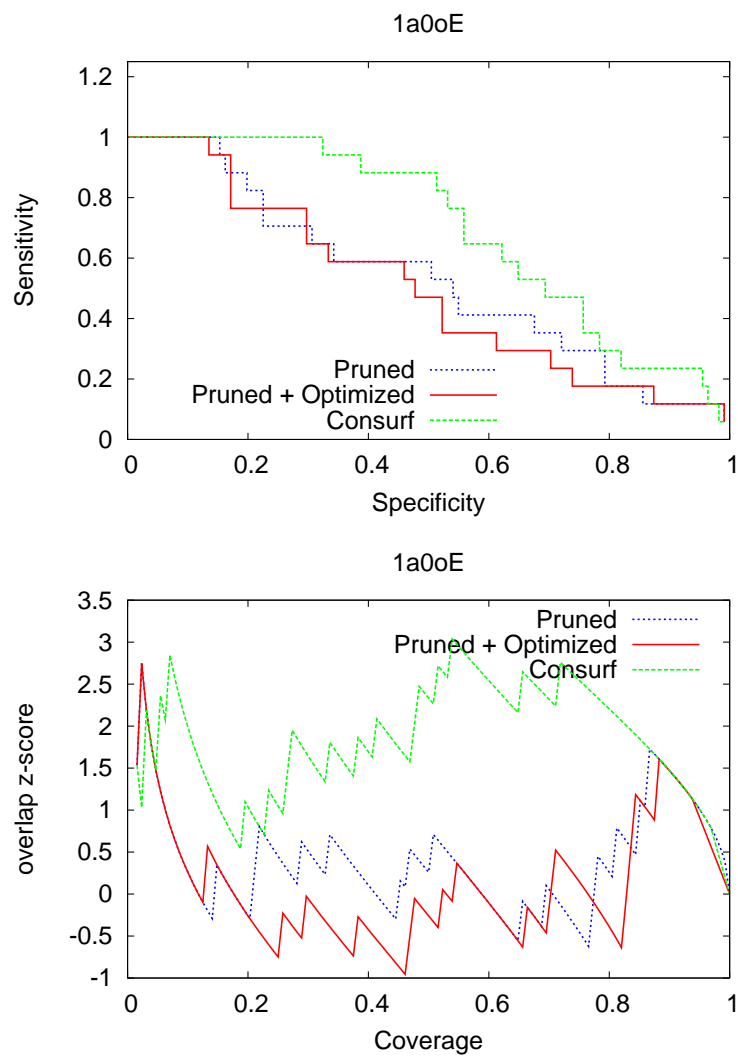

Figure 4: a) The sensitivity and specificity is shown for the pruned, pruned + optimized and the comparison method Consurf for PDBID 1a0oE. b) The overlap z-scores as a function of coverage for the three methods is shown.

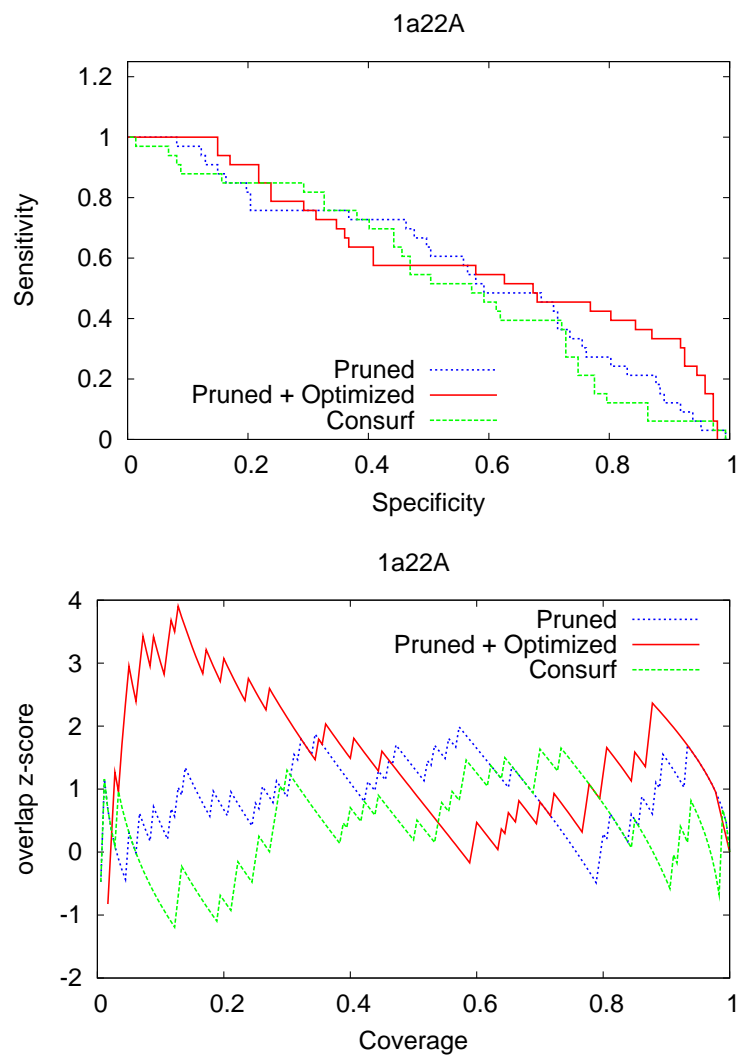

Figure 5: a) The sensitivity and specificity is shown for the pruned, pruned + optimized and the comparison method Consurf for PDBID 1a22A. b) The overlap z-scores as a function of coverage for the three methods is shown.



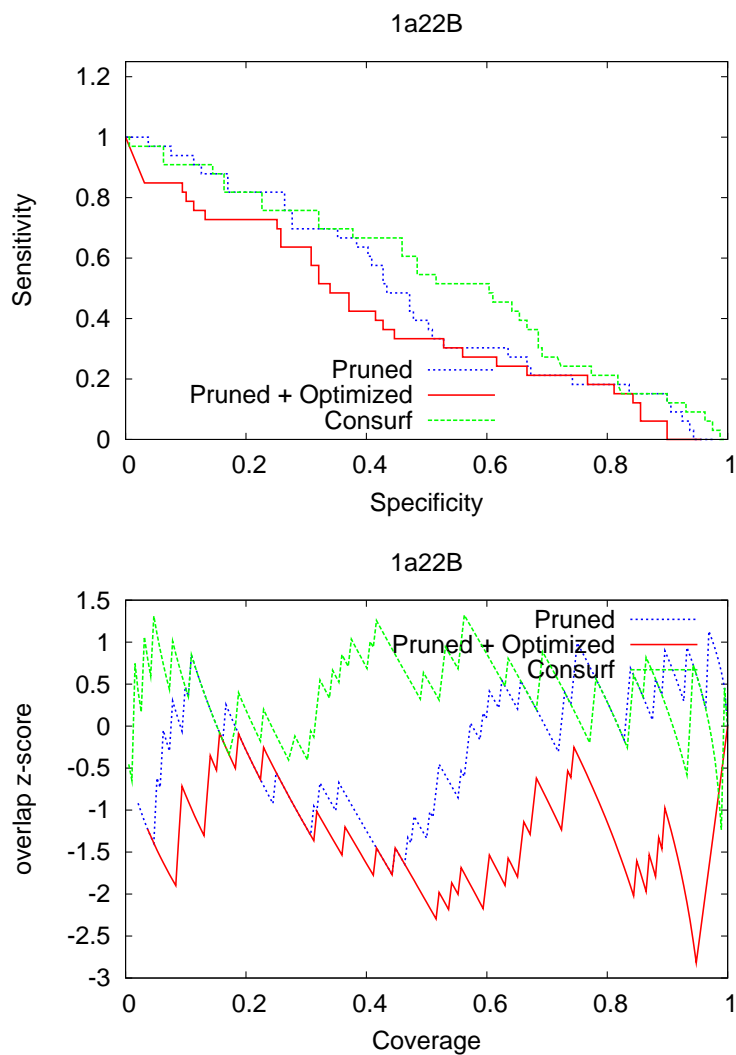

Figure 6: a) The sensitivity and specificity is shown for the pruned, pruned + optimized and the comparison method Consurf for PDBID 1a22B. b) The overlap z-scores as a function of coverage for the three methods is shown.

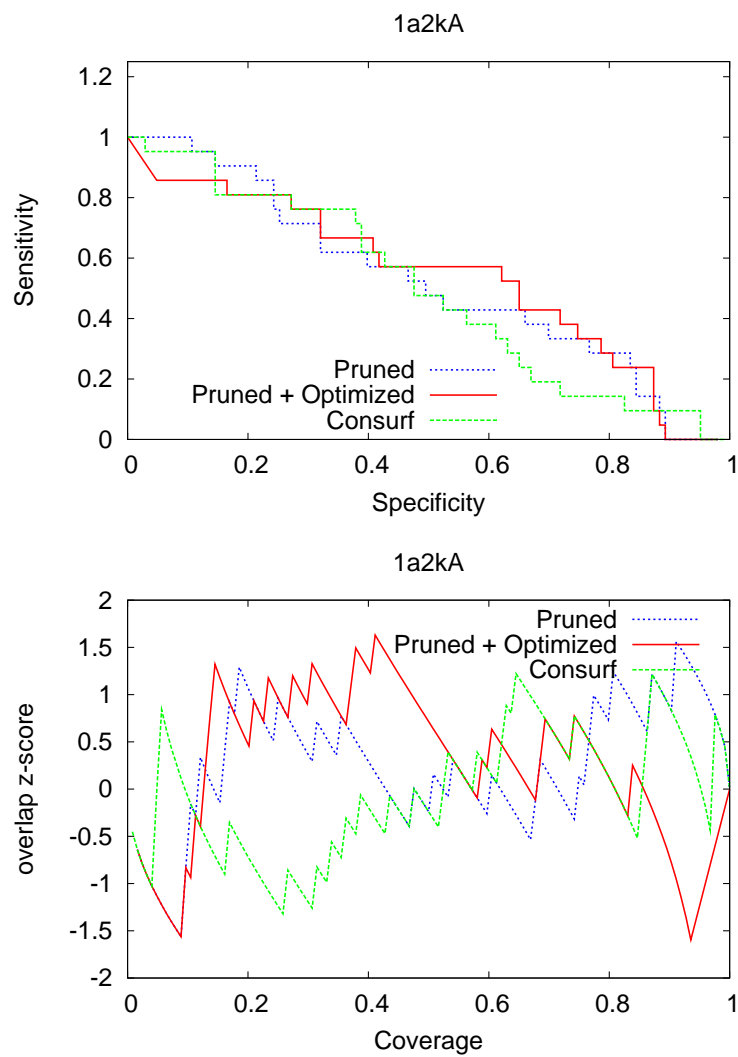

Figure 7: a) The sensitivity and specificity is shown for the pruned, pruned + optimized and the comparison method Consurf for PDBID 1a2kA. b) The overlap z-scores as a function of coverage for the three methods is shown.

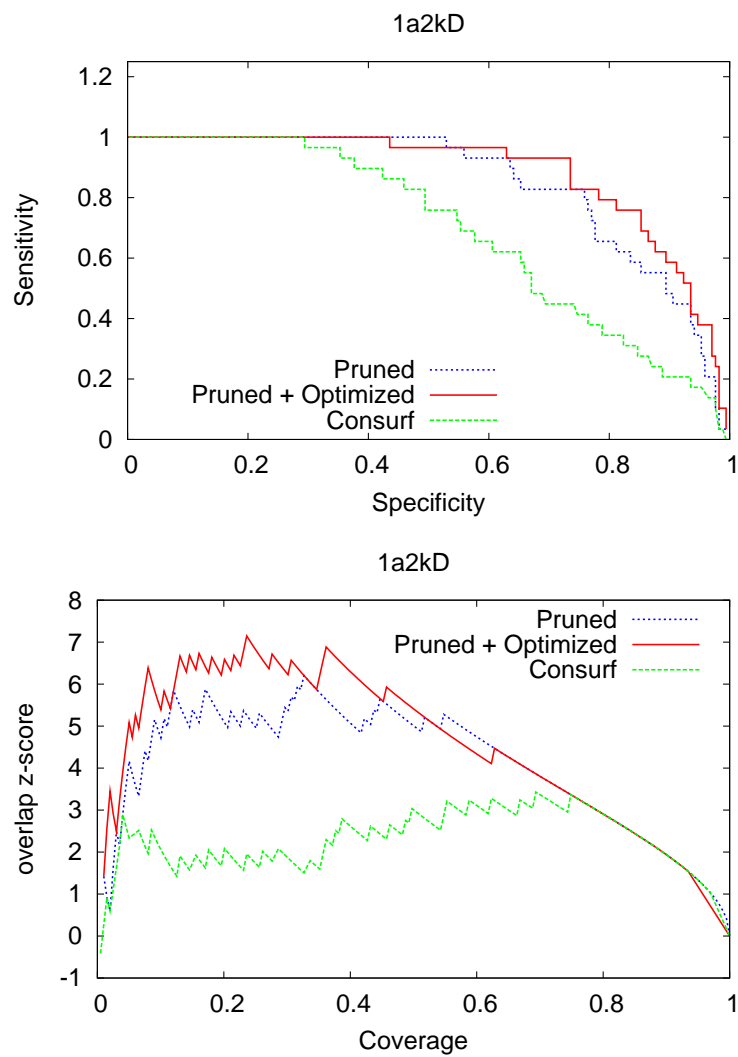

Figure 8: a) The sensitivity and specificity is shown for the pruned, pruned + optimized and the comparison method Consurf for PDBID 1a2kD. b) The overlap z-scores as a function of coverage for the three methods is shown.

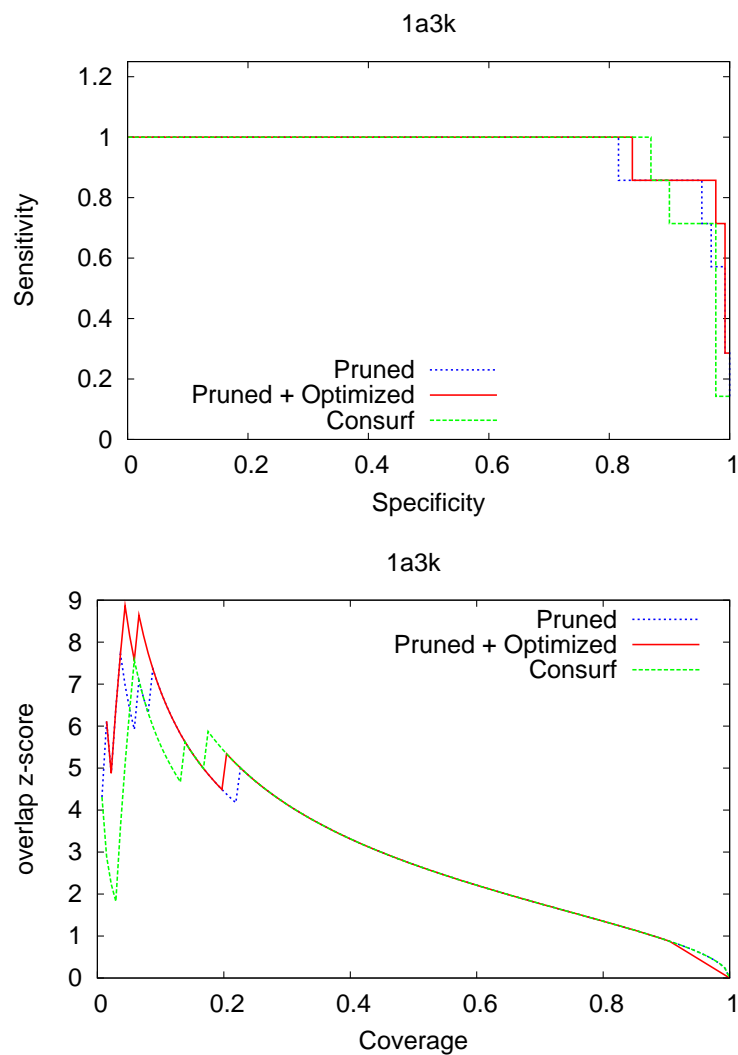

Figure 9: a) The sensitivity and specificity is shown for the pruned, pruned + optimized and the comparison method Consurf for PDBID 1a3k. b) The overlap z-scores as a function of coverage for the three methods is shown.

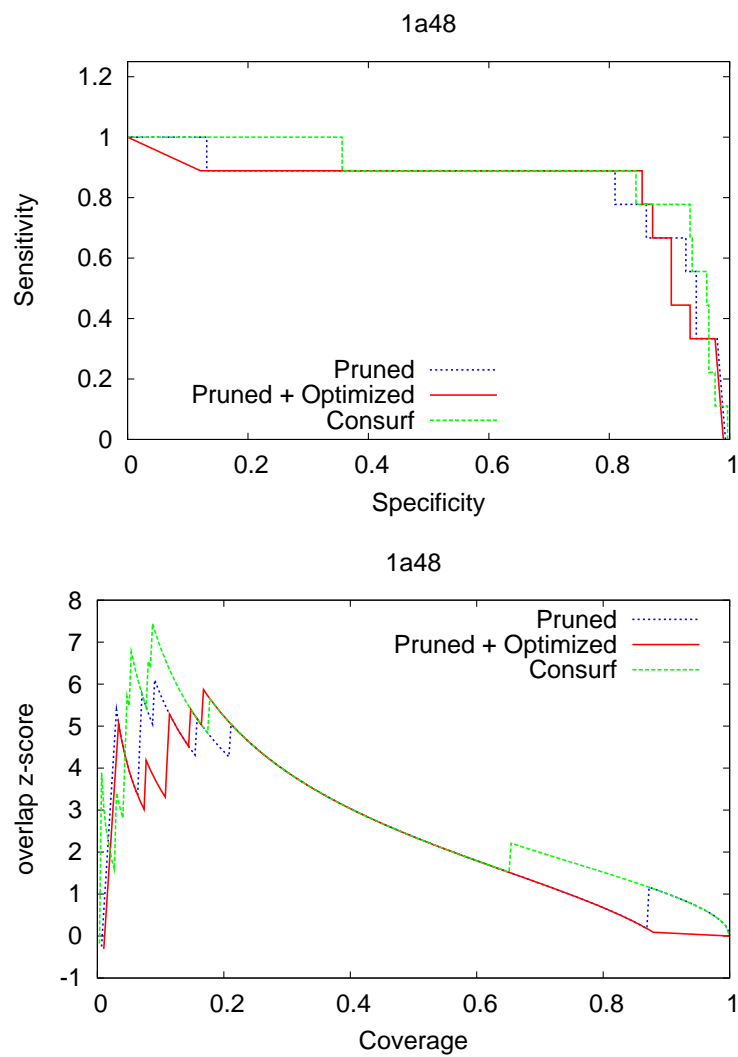

Figure 10: a) The sensitivity and specificity is shown for the pruned, pruned + optimized and the comparison method Consurf for PDBID 1a48. b) The overlap z-scores as a function of coverage for the three methods is shown.

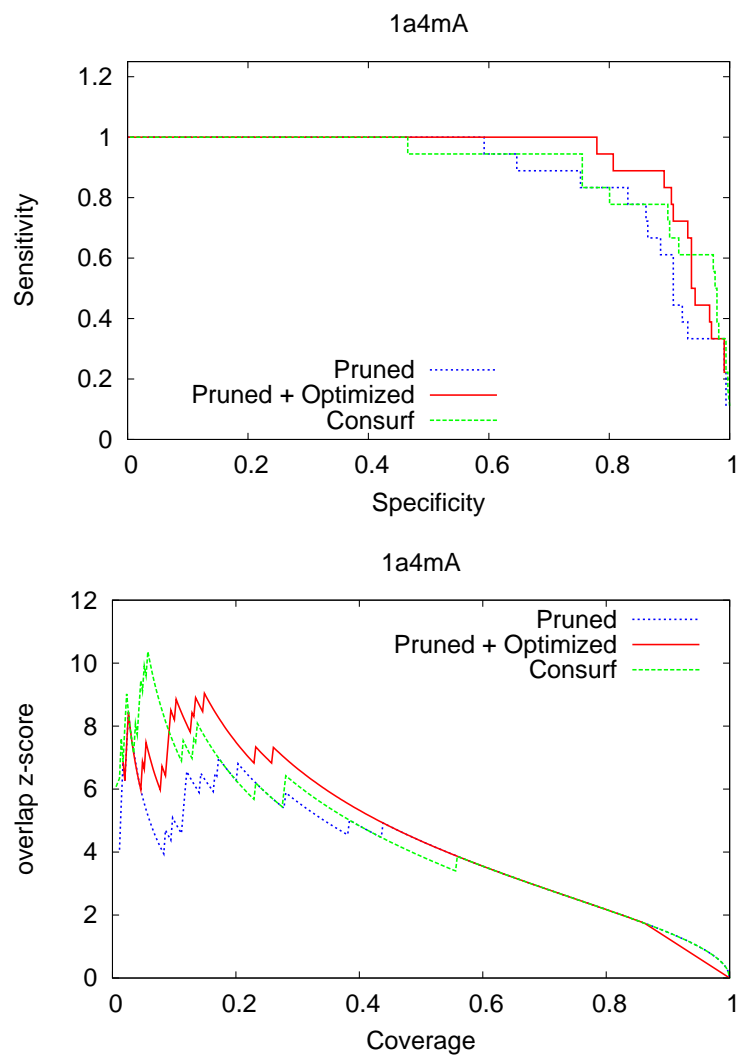

Figure 11: a) The sensitivity and specificity is shown for the pruned, pruned + optimized and the comparison method Consurf for PDBID 1a4mA. b) The overlap z-scores as a function of coverage for the three methods is shown.

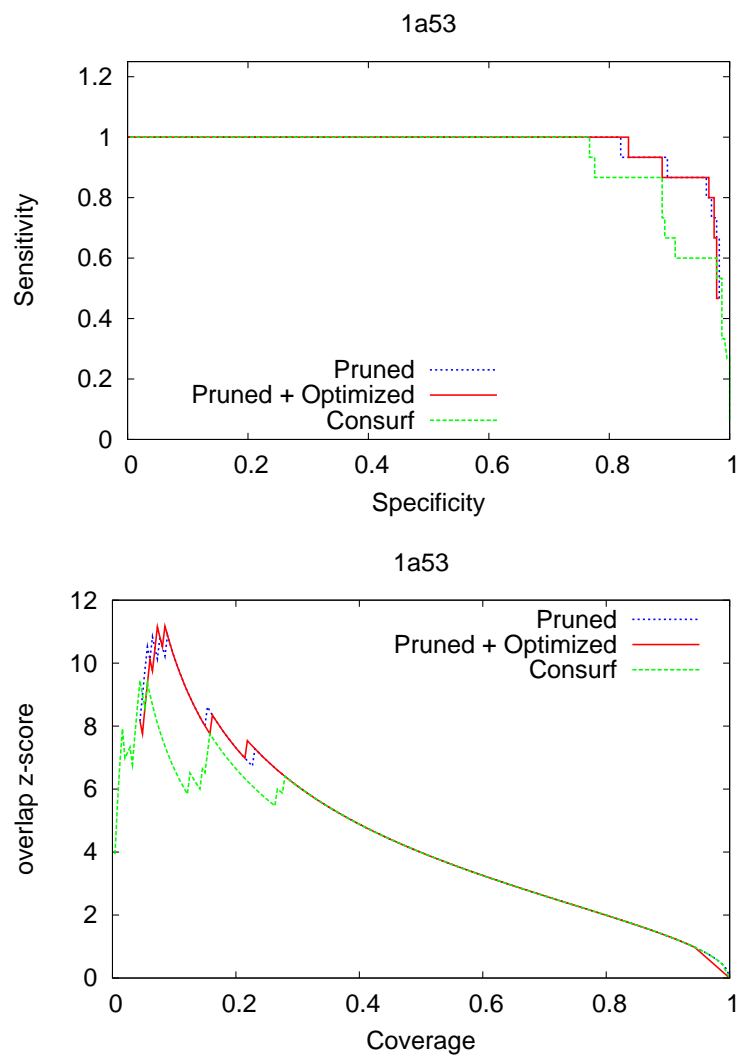

Figure 12: a) The sensitivity and specificity is shown for the pruned, pruned + optimized and the comparison method Consurf for PDBID 1a53. b) The overlap z-scores as a function of coverage for the three methods is shown.

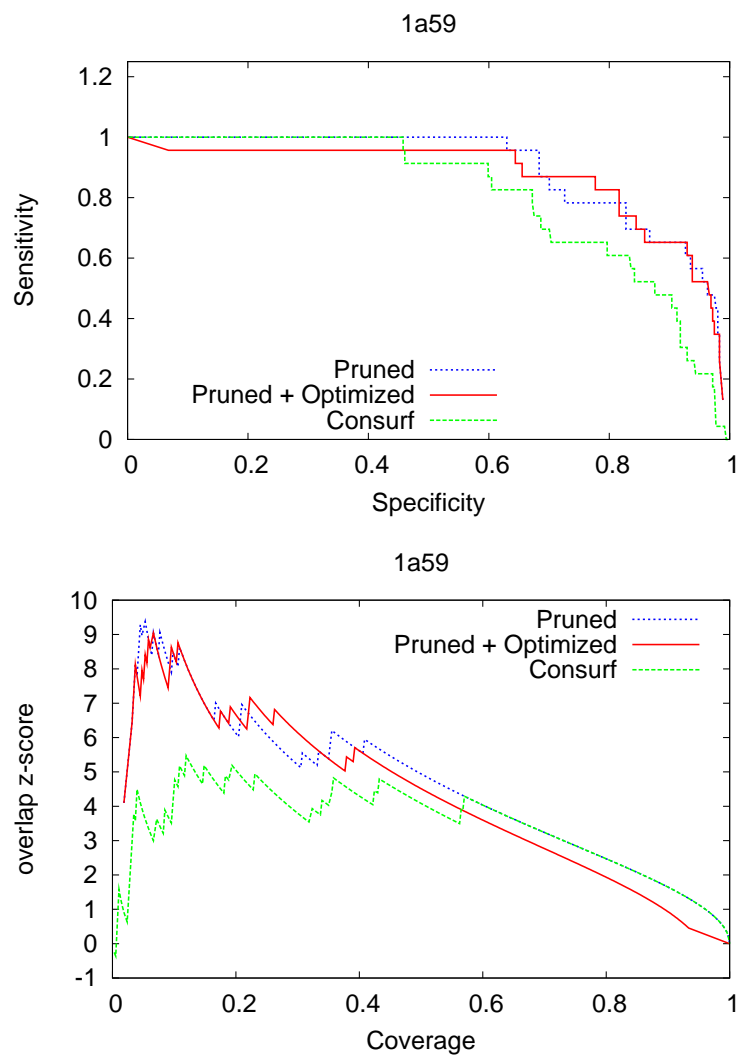

Figure 13: a) The sensitivity and specificity is shown for the pruned, pruned + optimized and the comparison method Consurf for PDBID 1a59. b) The overlap z-scores as a function of coverage for the three methods is shown.



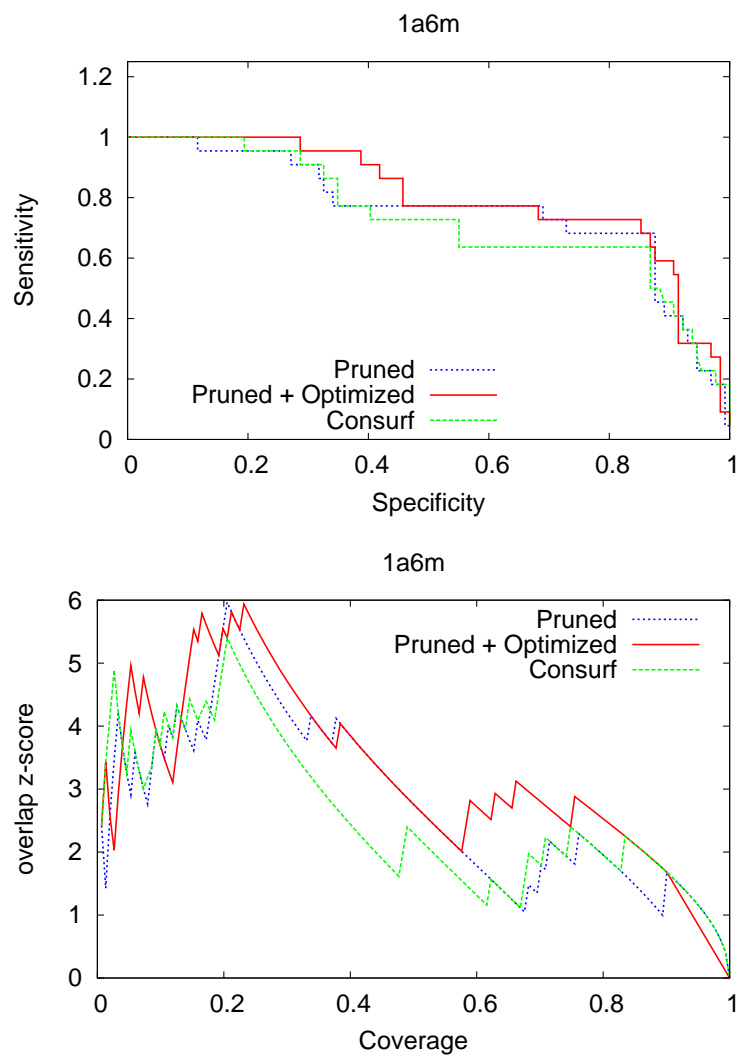

Figure 14: a) The sensitivity and specificity is shown for the pruned, pruned + optimized and the comparison method Consurf for PDBID 1a6m. b) The overlap z-scores as a function of coverage for the three methods is shown.

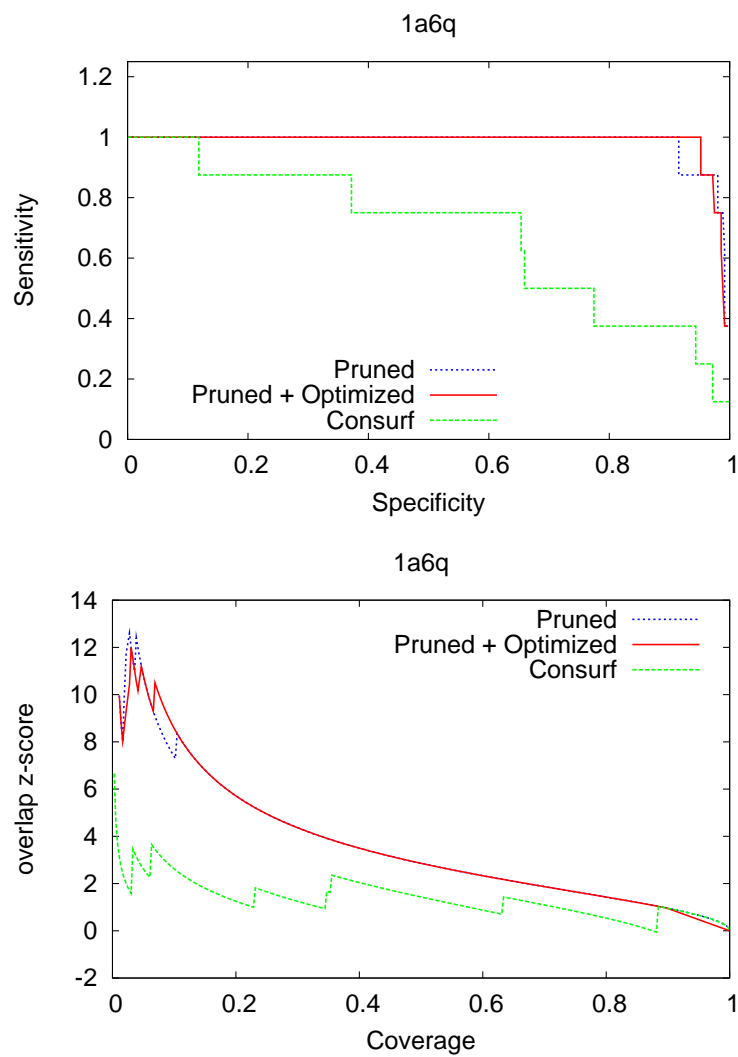

Figure 15: a) The sensitivity and specificity is shown for the pruned, pruned + optimized and the comparison method Consurf for PDBID 1a6q. b) The overlap z-scores as a function of coverage for the three methods is shown.

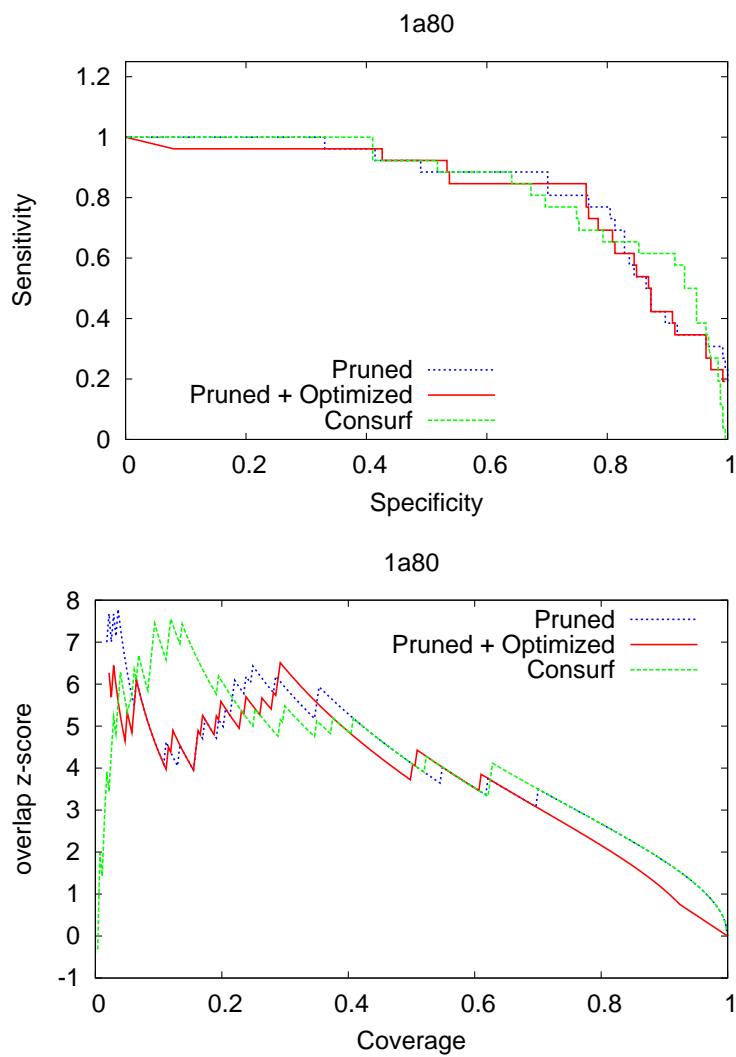

Figure 16: a) The sensitivity and specificity is shown for the pruned, pruned + optimized and the comparison method Consurf for PDBID 1a80. b) The overlap z-scores as a function of coverage for the three methods is shown.

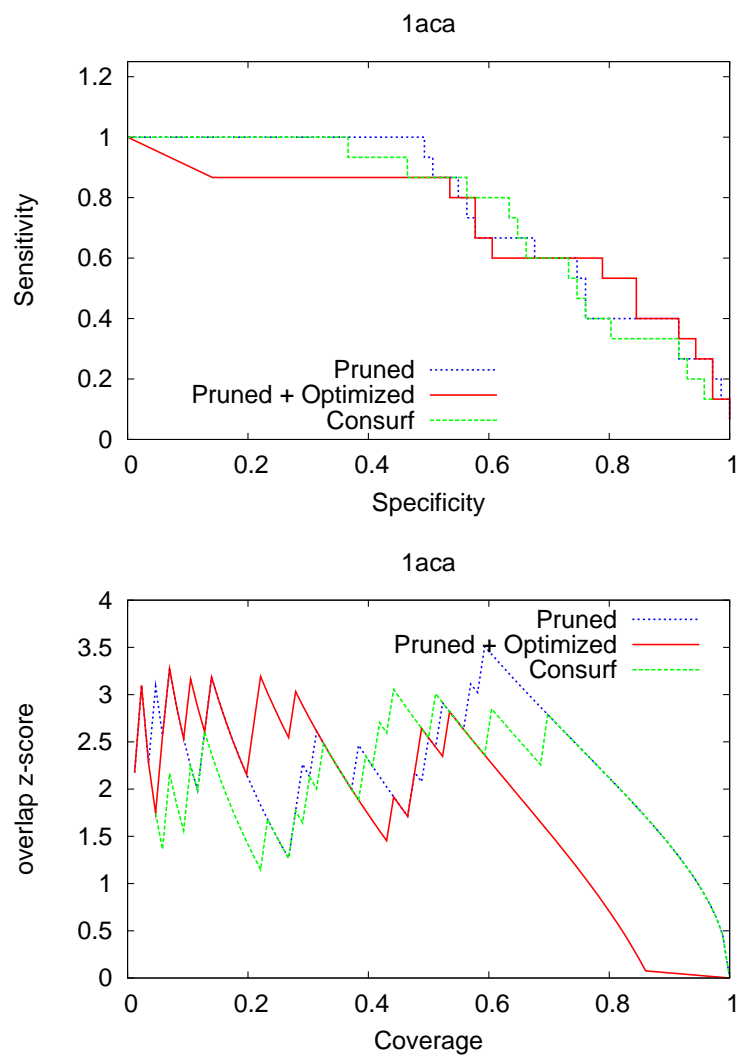

Figure 17: a) The sensitivity and specificity is shown for the pruned, pruned + optimized and the comparison method Consurf for PDBID 1aca. b) The overlap z-scores as a function of coverage for the three methods is shown.

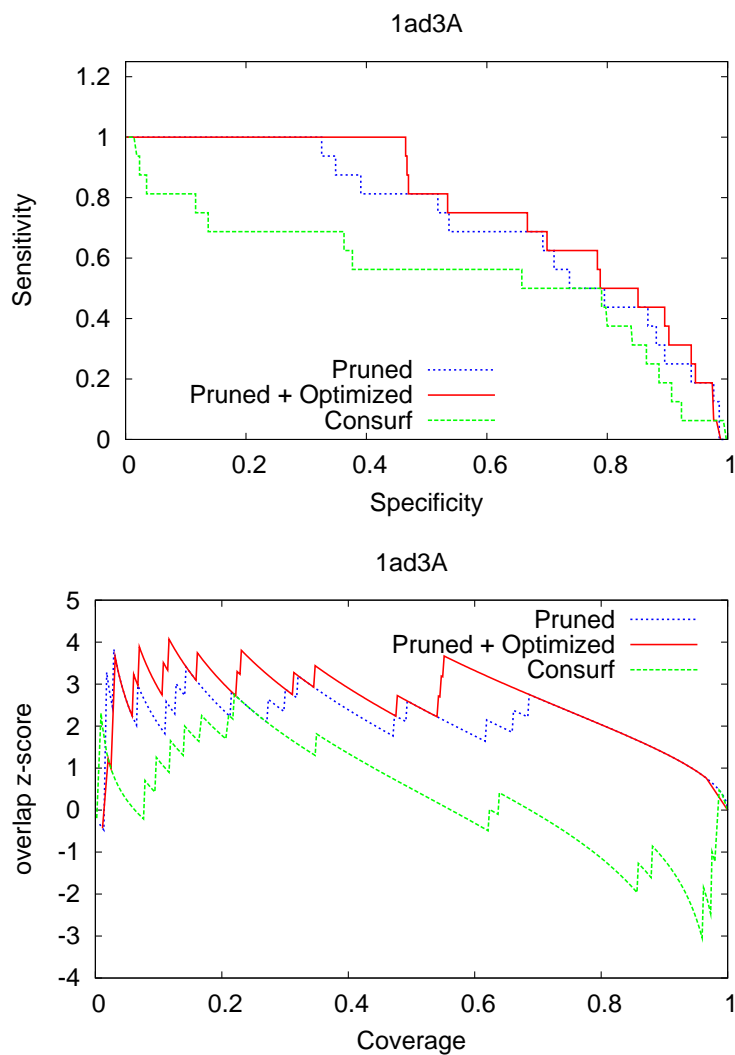

Figure 18: a) The sensitivity and specificity is shown for the pruned, pruned + optimized and the comparison method Consurf for PDBID 1ad3A. b) The overlap z-scores as a function of coverage for the three methods is shown.

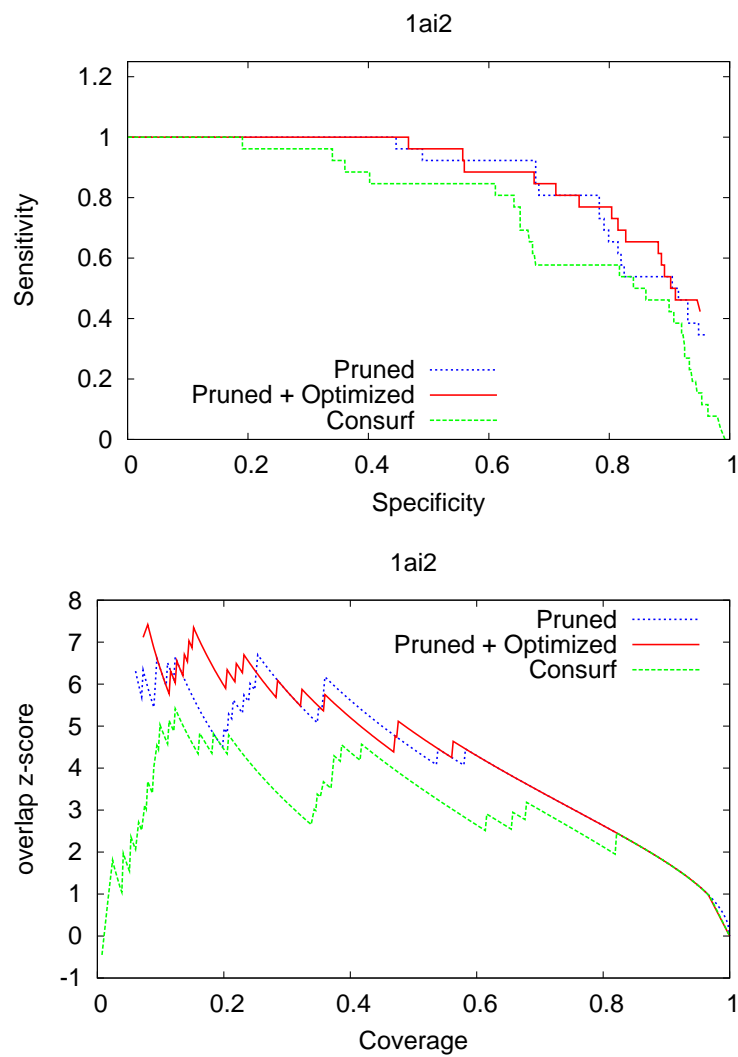

Figure 19: a) The sensitivity and specificity is shown for the pruned, pruned + optimized and the comparison method Consurf for PDBID 1ai2. b) The overlap z-scores as a function of coverage for the three methods is shown.

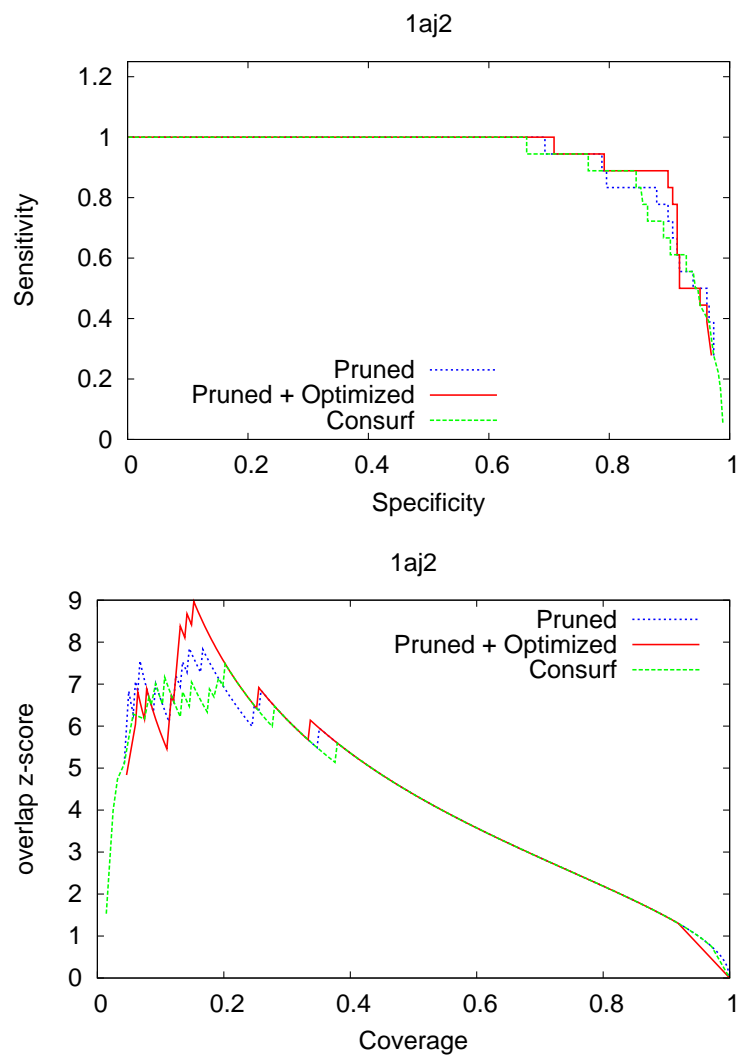

Figure 20: a) The sensitivity and specificity is shown for the pruned, pruned + optimized and the comparison method Consurf for PDBID 1aj2. b) The overlap z-scores as a function of coverage for the three methods is shown.

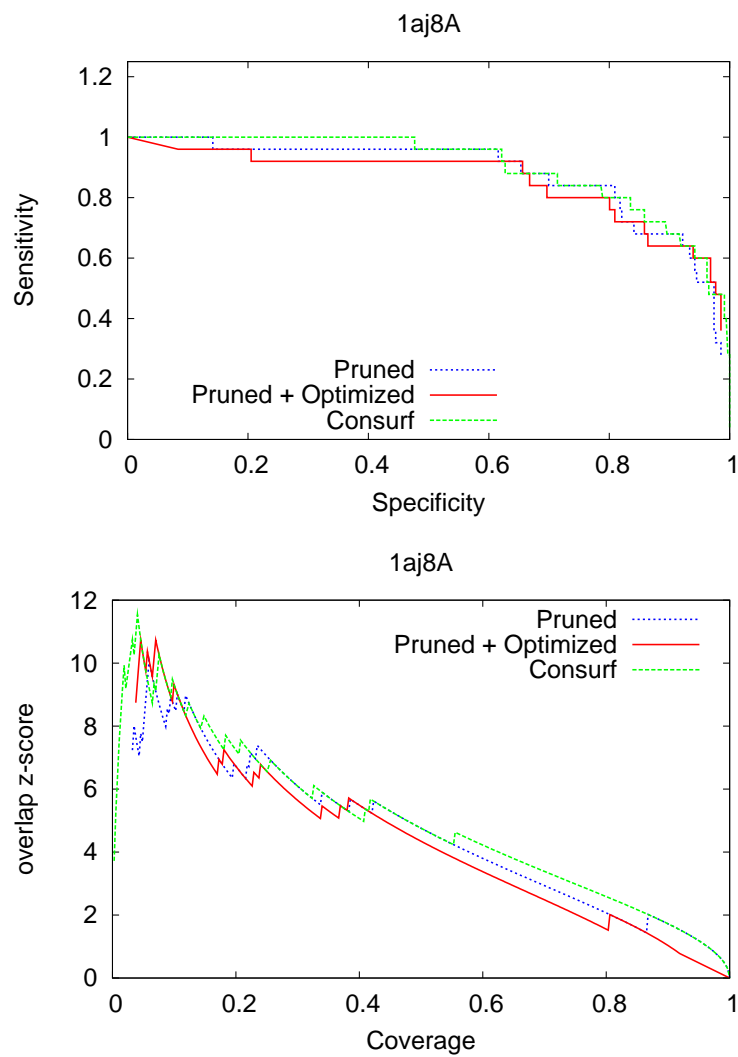

Figure 21: a) The sensitivity and specificity is shown for the pruned, pruned + optimized and the comparison method Consurf for PDBID 1aj8A. b) The overlap z-scores as a function of coverage for the three methods is shown.



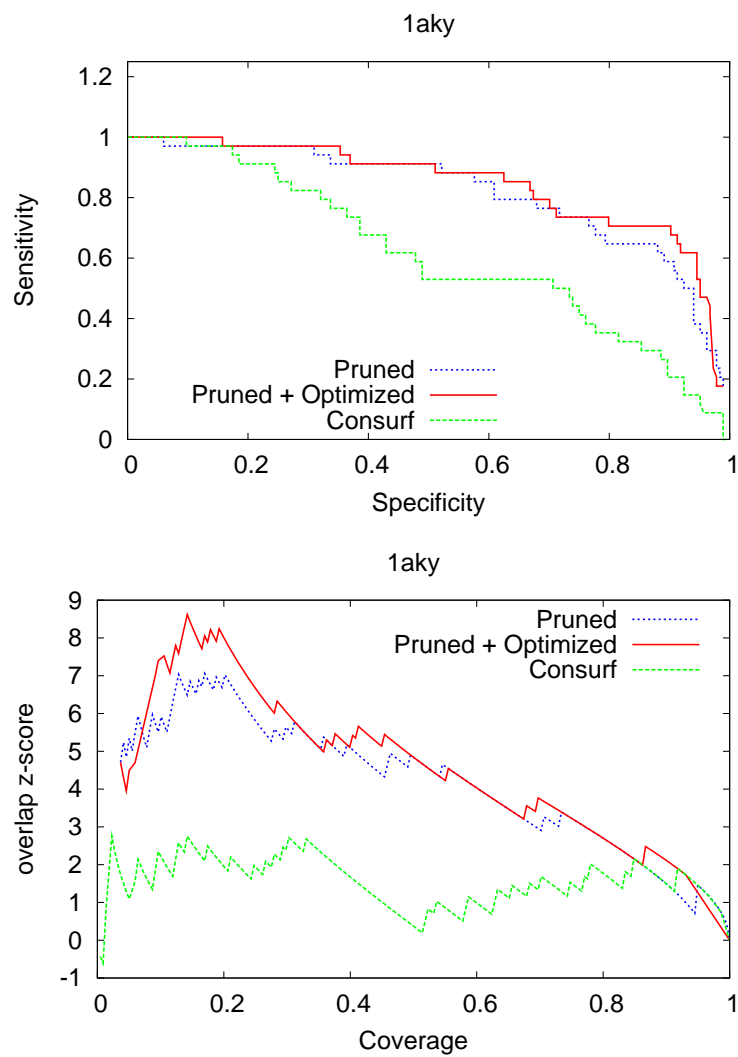

Figure 22: a) The sensitivity and specificity is shown for the pruned, pruned + optimized and the comparison method Consurf for PDBID 1aky. b) The overlap z-scores as a function of coverage for the three methods is shown.

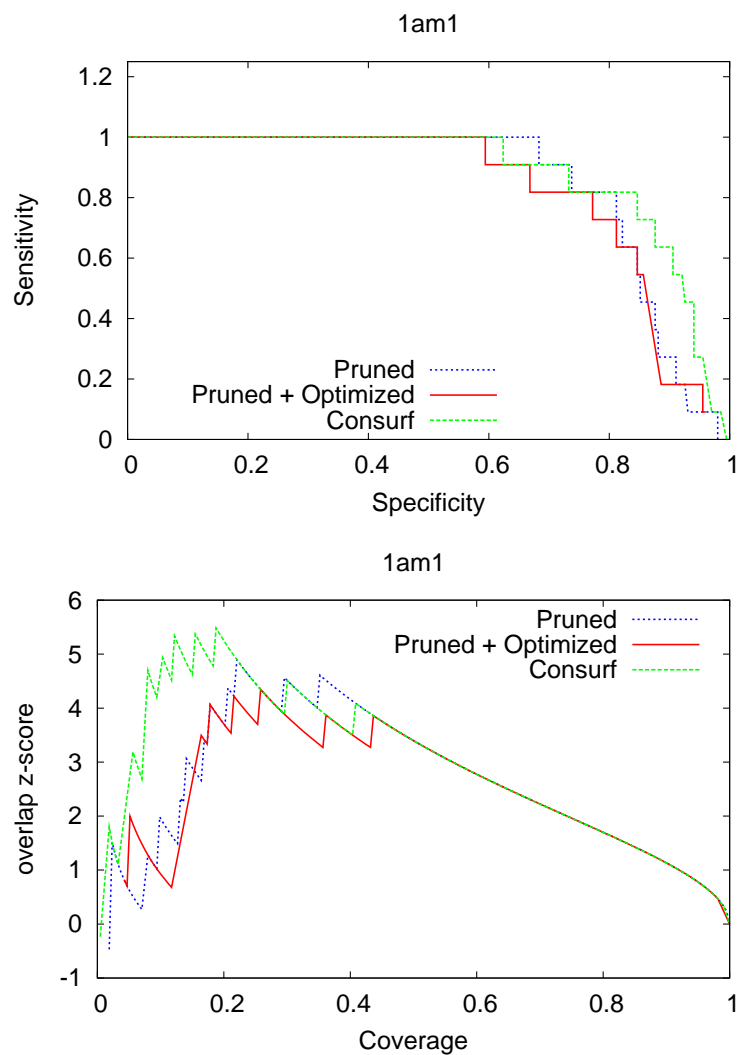

Figure 23: a) The sensitivity and specificity is shown for the pruned, pruned + optimized and the comparison method Consurf for PDBID 1am1. b) The overlap z-scores as a function of coverage for the three methods is shown.

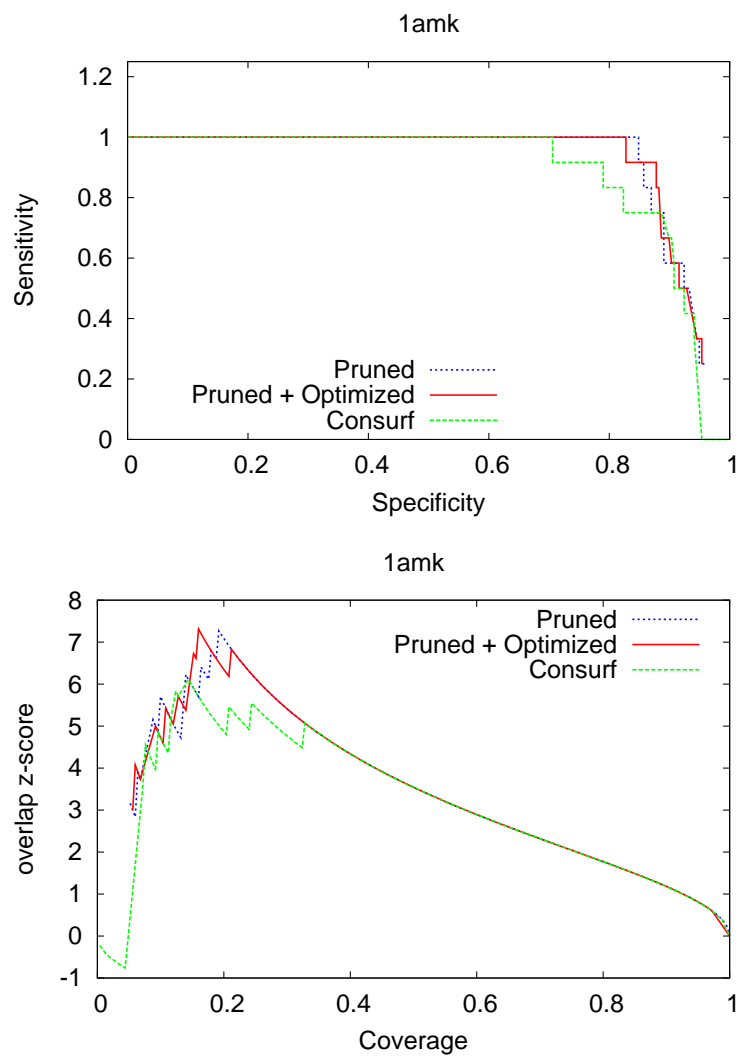

Figure 24: a) The sensitivity and specificity is shown for the pruned, pruned + optimized and the comparison method Consurf for PDBID 1amk. b) The overlap z-scores as a function of coverage for the three methods is shown.

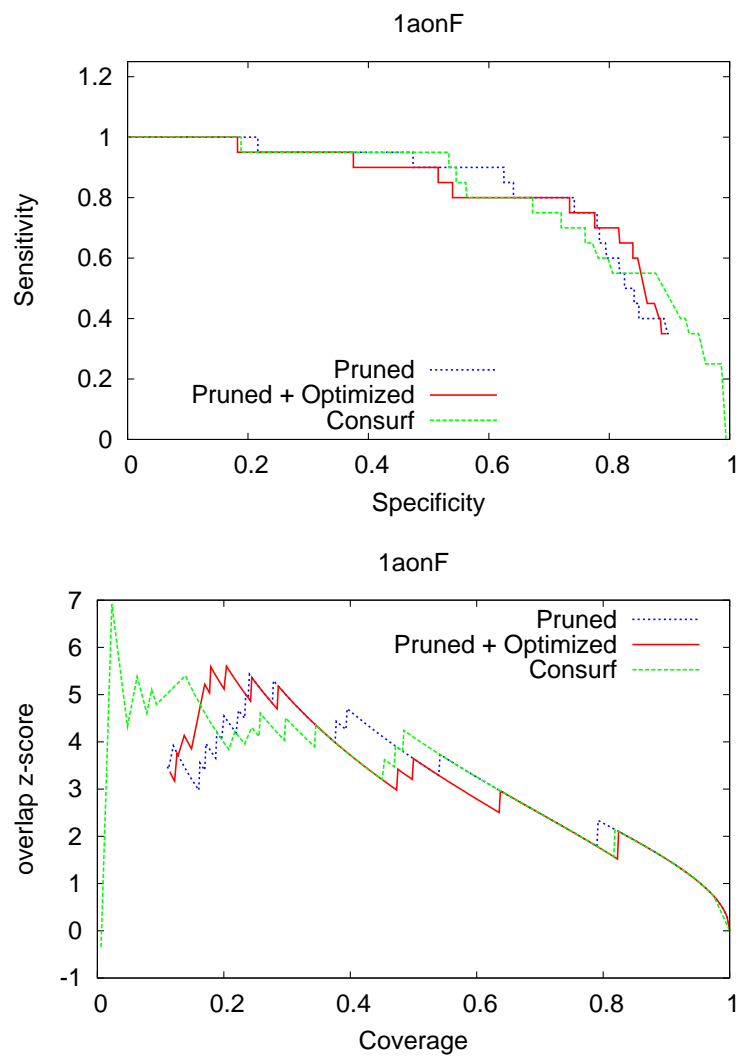

Figure 25: a) The sensitivity and specificity is shown for the pruned, pruned + optimized and the comparison method Consurf for PDBID 1aonF. b) The overlap z-scores as a function of coverage for the three methods is shown.

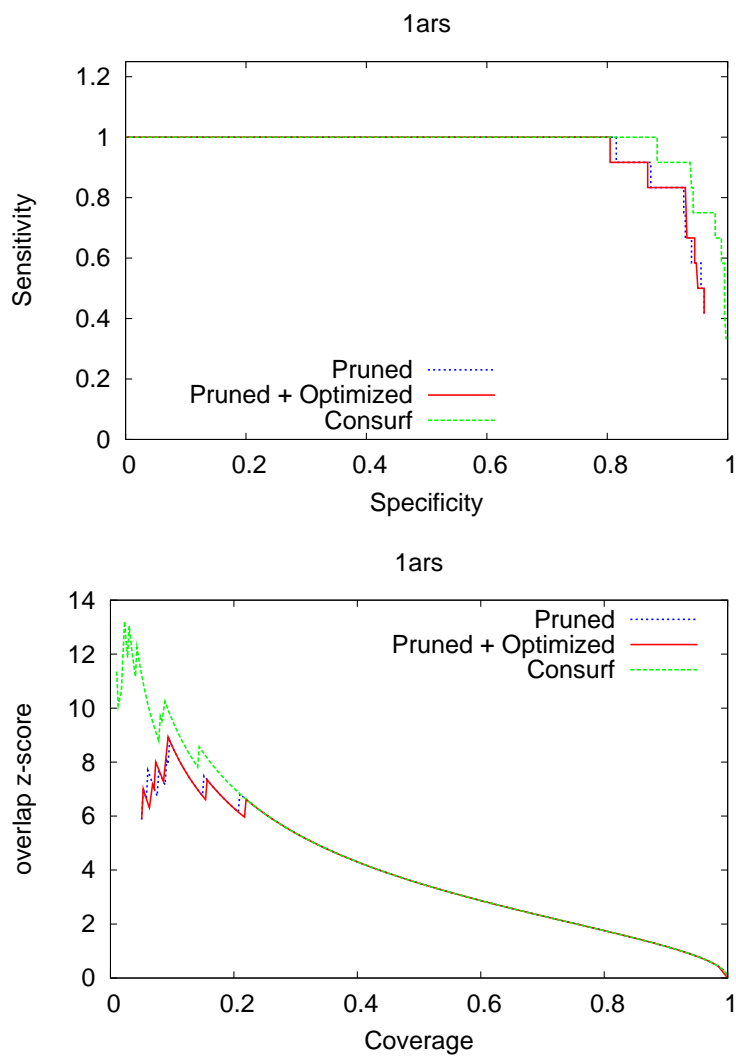

Figure 26: a) The sensitivity and specificity is shown for the pruned, pruned + optimized and the comparison method Consurf for PDBID 1ars. b) The overlap z-scores as a function of coverage for the three methods is shown.

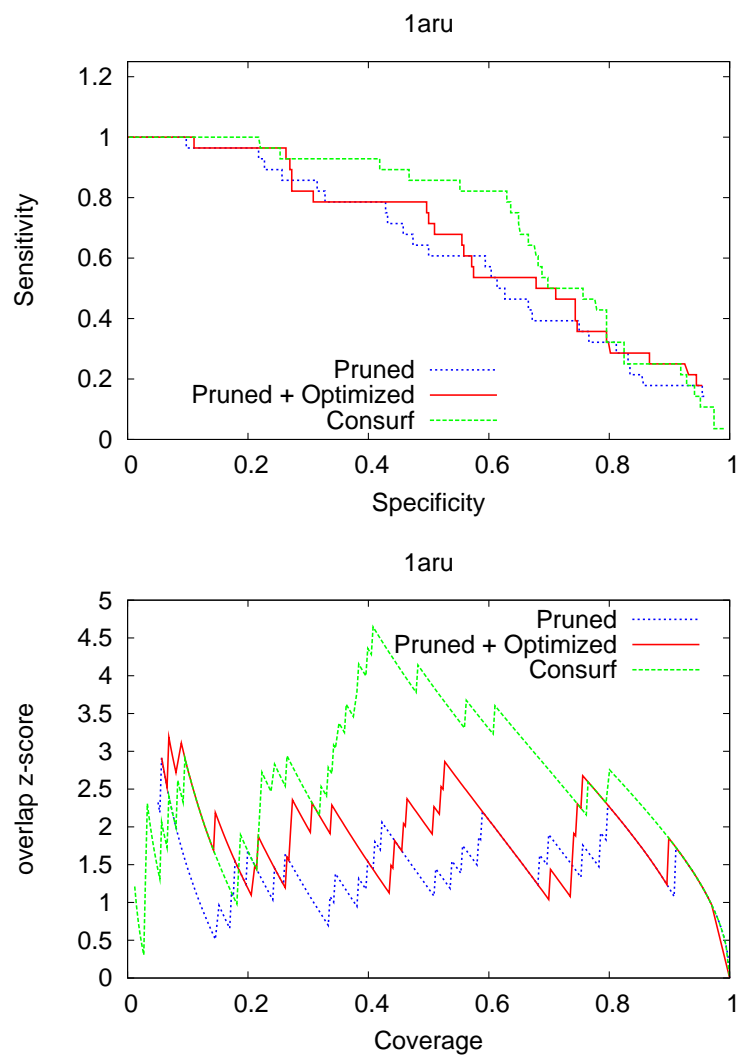

Figure 27: a) The sensitivity and specificity is shown for the pruned, pruned + optimized and the comparison method Consurf for PDBID 1aru. b) The overlap z-scores as a function of coverage for the three methods is shown.

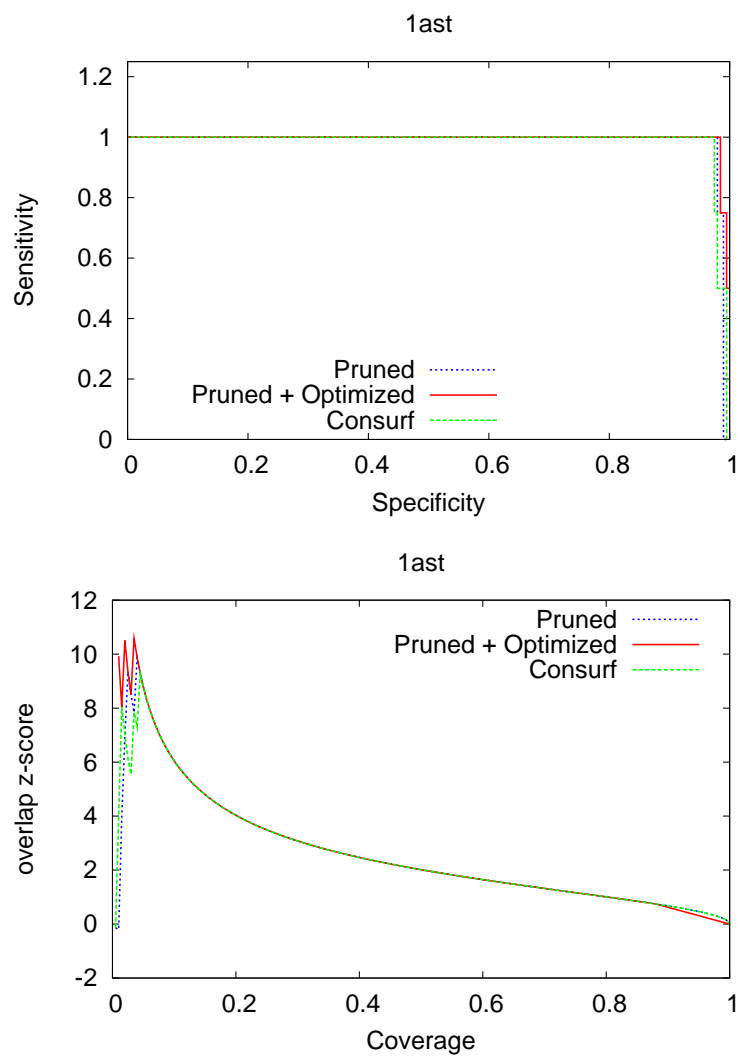

Figure 28: a) The sensitivity and specificity is shown for the pruned, pruned + optimized and the comparison method Consurf for PDBID 1ast. b) The overlap z-scores as a function of coverage for the three methods is shown.

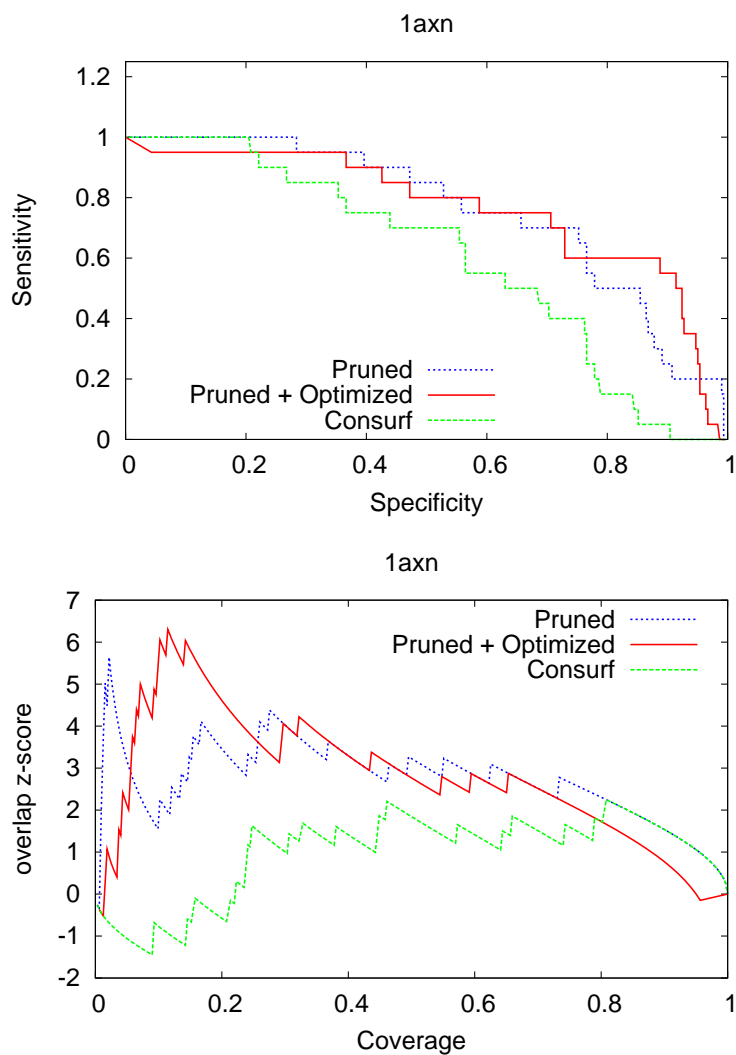

Figure 29: a) The sensitivity and specificity is shown for the pruned, pruned + optimized and the comparison method Consurf for PDBID 1axn. b) The overlap z-scores as a function of coverage for the three methods is shown.



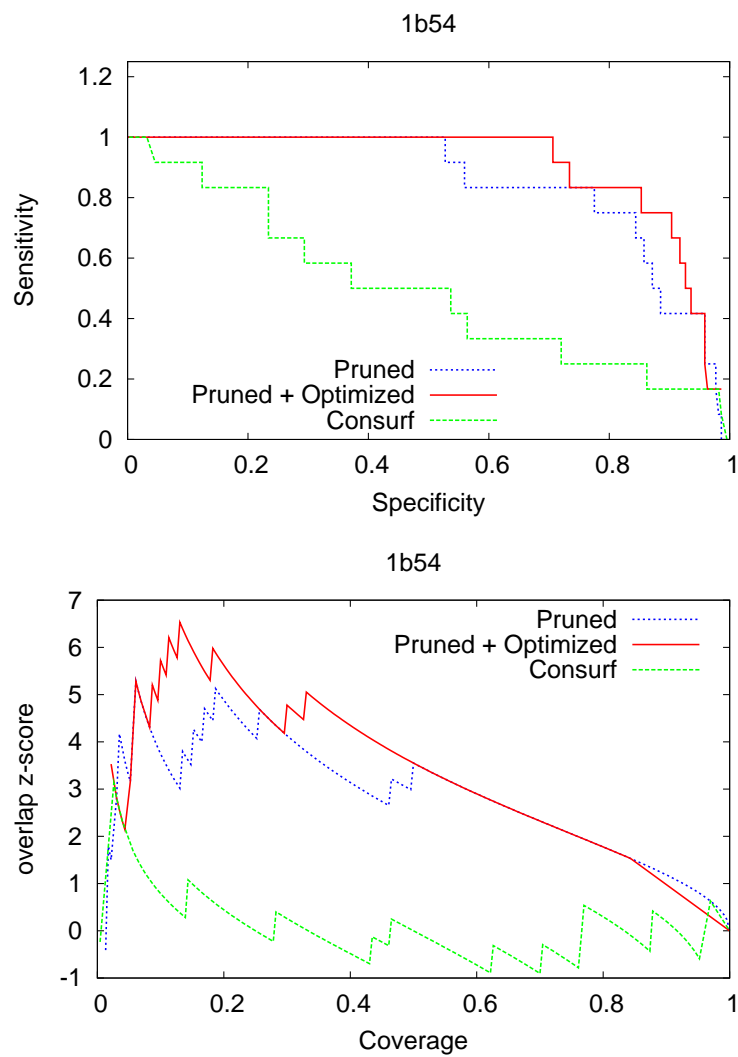

Figure 30: a) The sensitivity and specificity is shown for the pruned, pruned + optimized and the comparison method Consurf for PDBID 1b54. b) The overlap z-scores as a function of coverage for the three methods is shown.

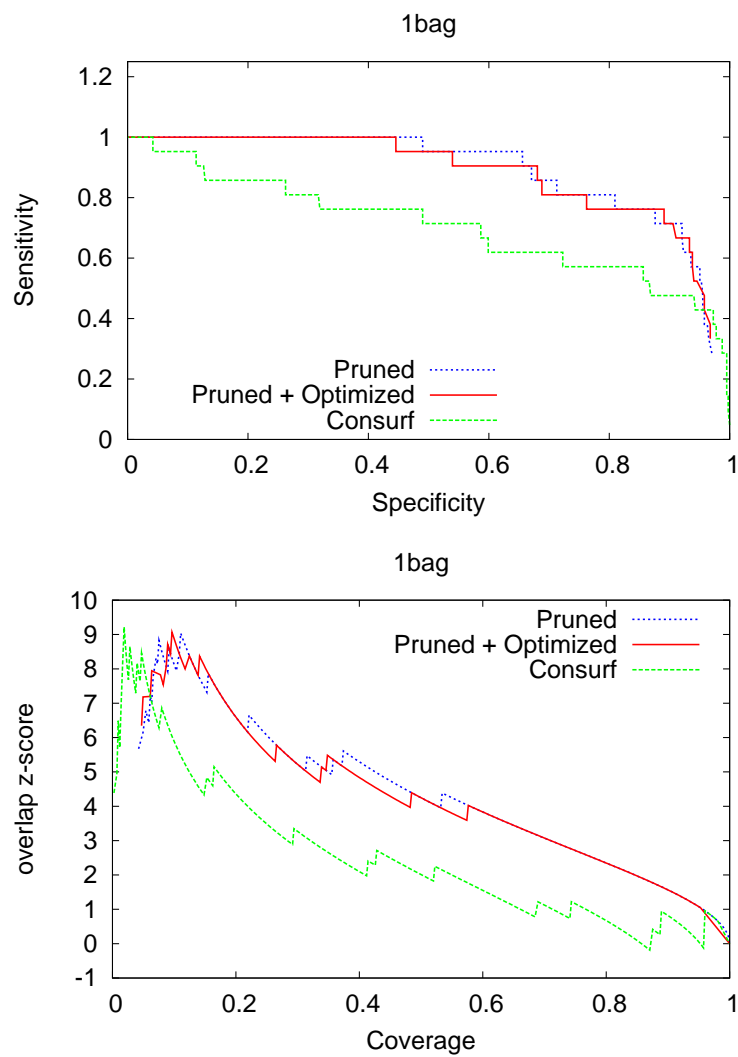

Figure 31: a) The sensitivity and specificity is shown for the pruned, pruned + optimized and the comparison method Consurf for PDBID 1bag. b) The overlap z-scores as a function of coverage for the three methods is shown.

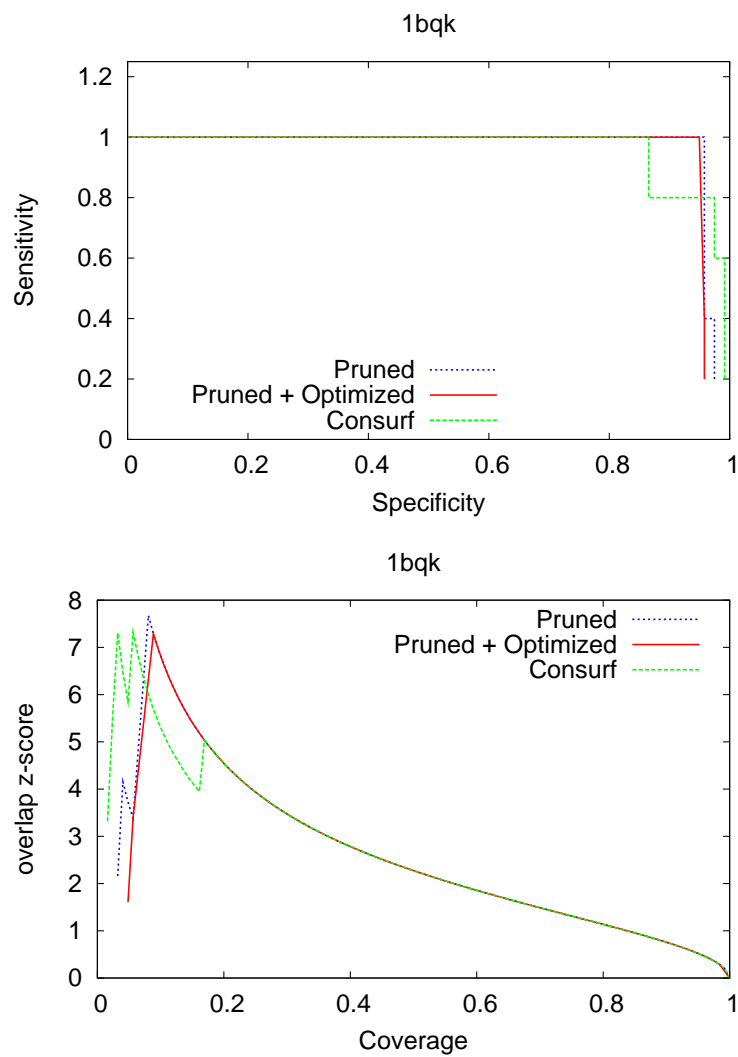

Figure 32: a) The sensitivity and specificity is shown for the pruned, pruned + optimized and the comparison method Consurf for PDBID 1bqk. b) The overlap z-scores as a function of coverage for the three methods is shown.

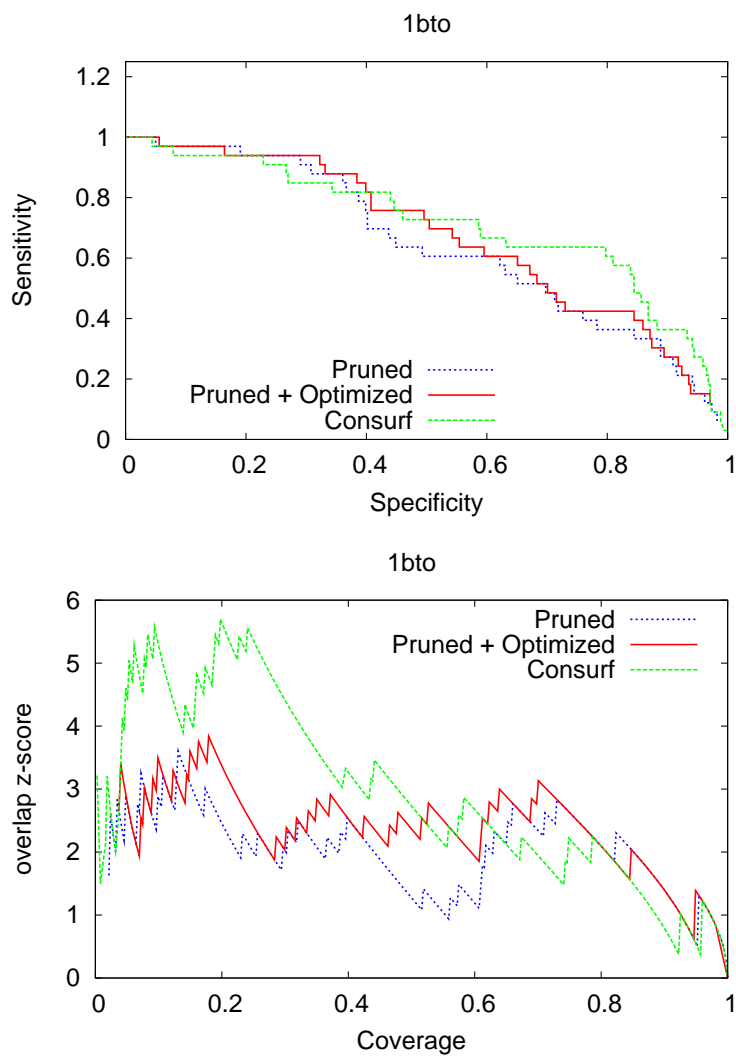

Figure 33: a) The sensitivity and specificity is shown for the pruned, pruned + optimized and the comparison method Consurf for PDBID 1bto. b) The overlap z-scores as a function of coverage for the three methods is shown.

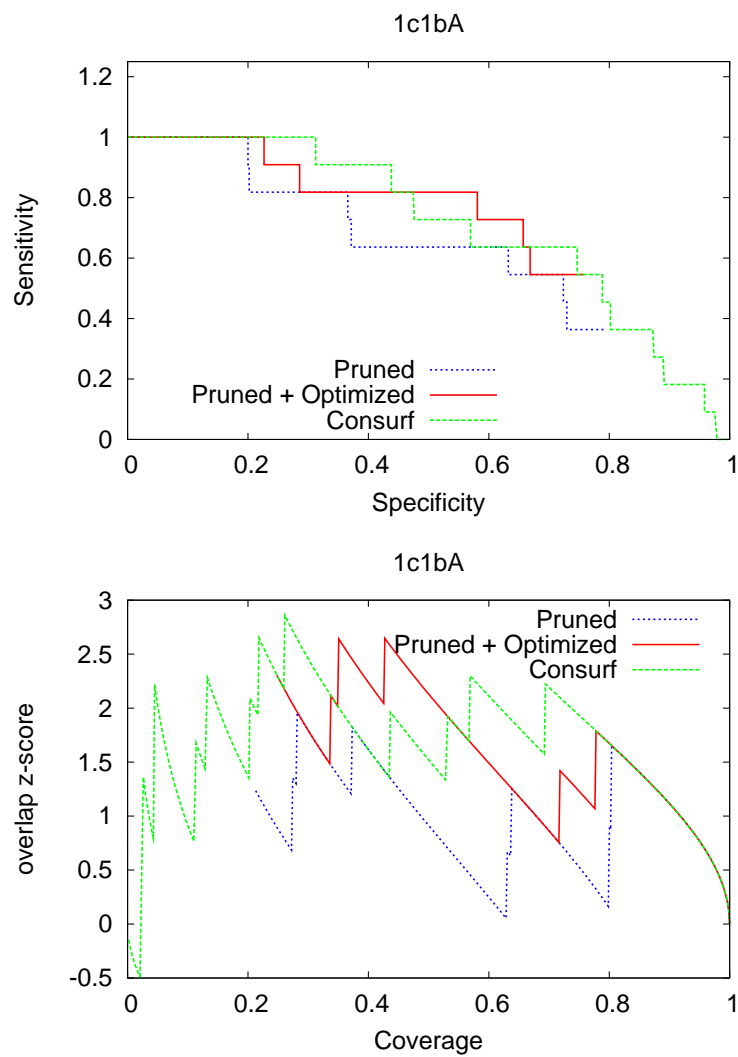

Figure 34: a) The sensitivity and specificity is shown for the pruned, pruned + optimized and the comparison method Consurf for PDBID 1c1bA. b) The overlap z-scores as a function of coverage for the three methods is shown.

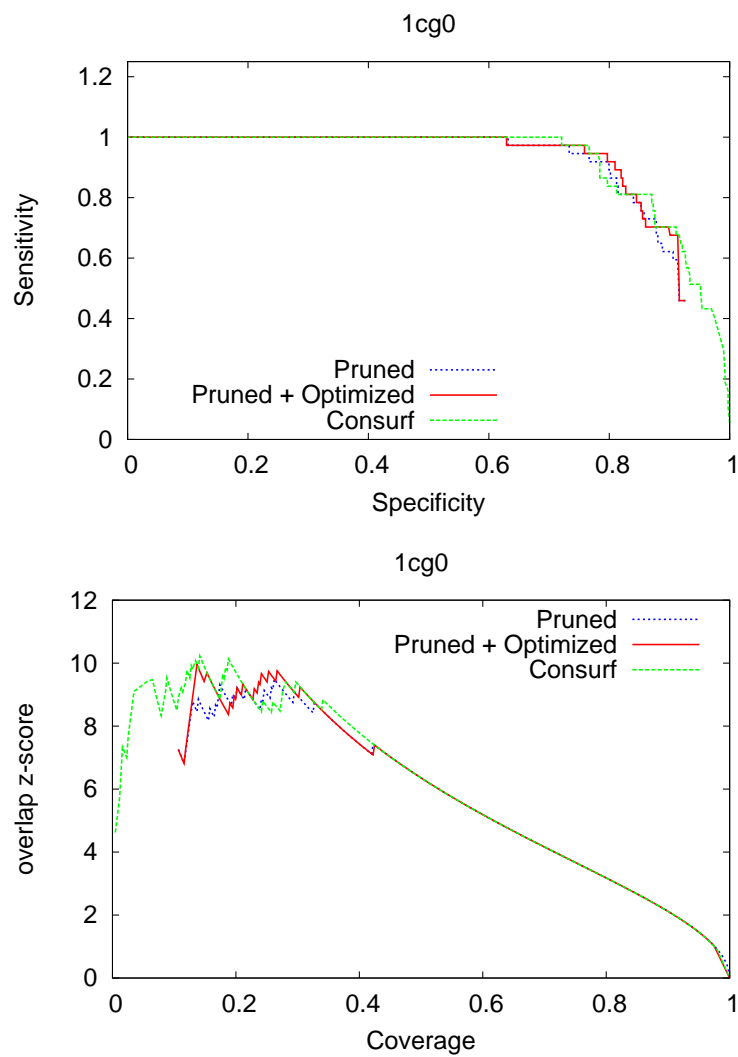

Figure 35: a) The sensitivity and specificity is shown for the pruned, pruned + optimized and the comparison method Consurf for PDBID 1cg0. b) The overlap z-scores as a function of coverage for the three methods is shown.

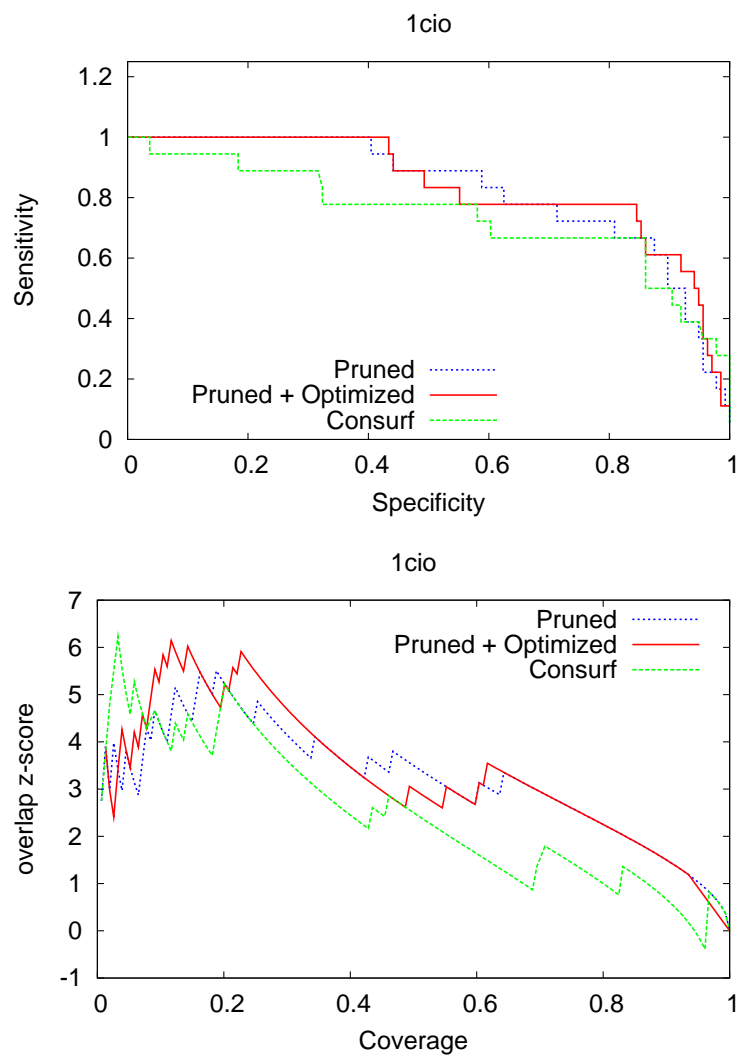

Figure 36: a) The sensitivity and specificity is shown for the pruned, pruned + optimized and the comparison method Consurf for PDBID 1cio. b) The overlap z-scores as a function of coverage for the three methods is shown.

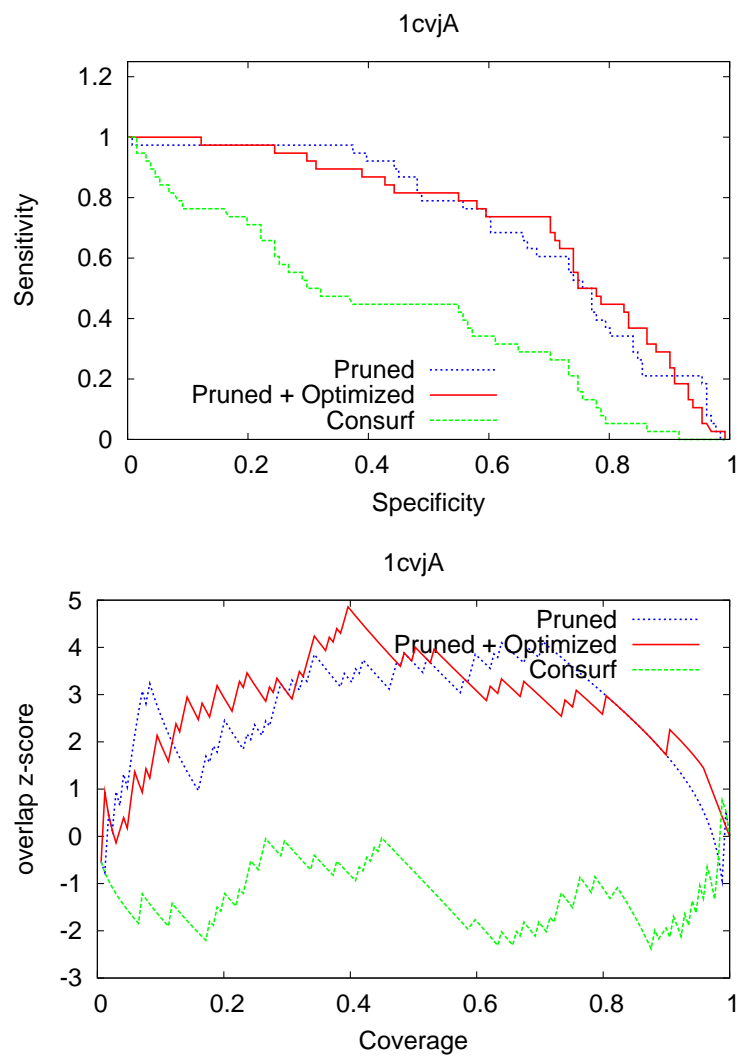

Figure 37: a) The sensitivity and specificity is shown for the pruned, pruned + optimized and the comparison method Consurf for PDBID 1cvjA. b) The overlap z-scores as a function of coverage for the three methods is shown.



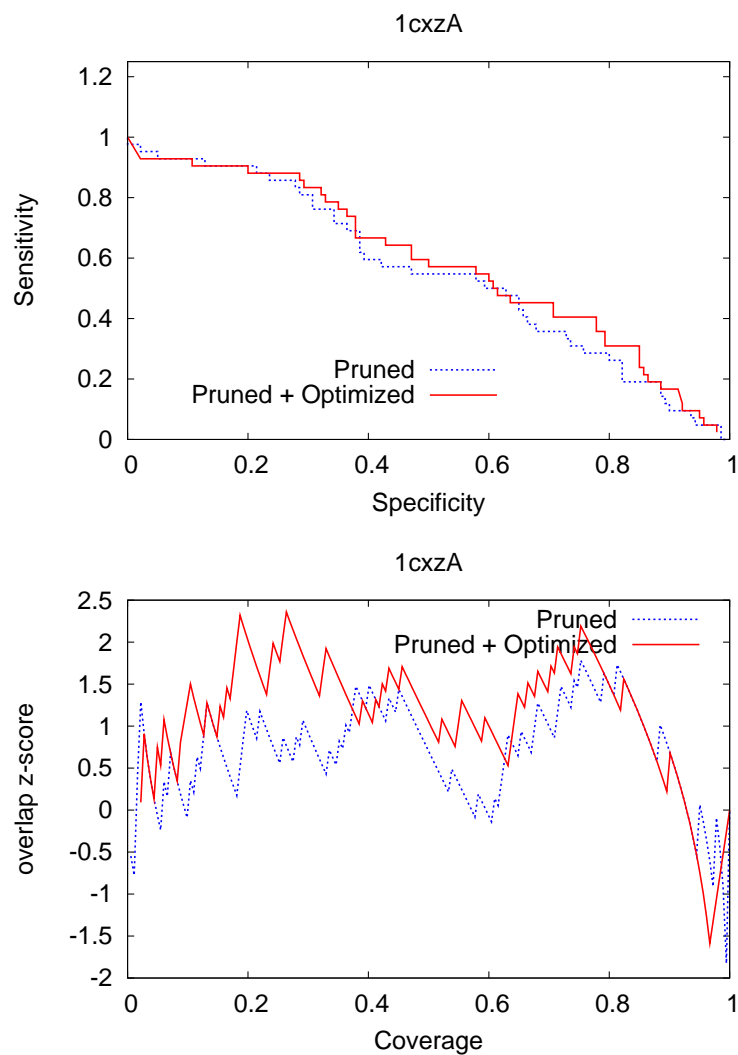

Figure 38: a) The sensitivity and specificity is shown for the pruned, pruned + optimized and the comparison method Consurf for PDBID 1cxzA. b) The overlap z-scores as a function of coverage for the three methods is shown.

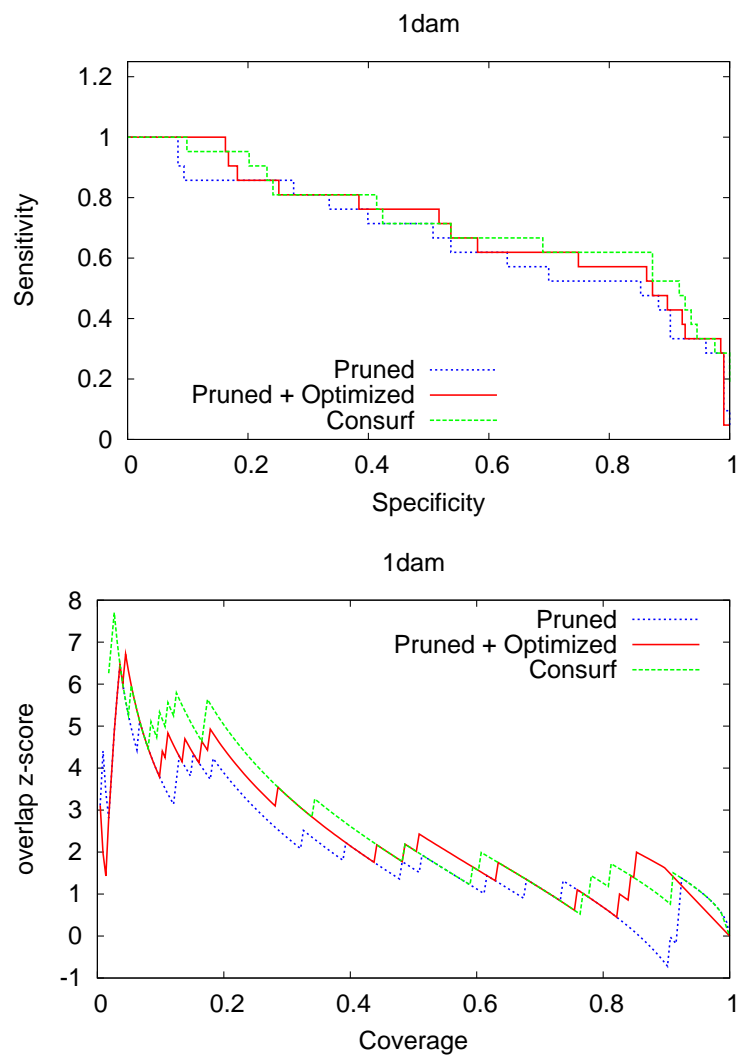

Figure 39: a) The sensitivity and specificity is shown for the pruned, pruned + optimized and the comparison method Consurf for PDBID 1dam. b) The overlap z-scores as a function of coverage for the three methods is shown.

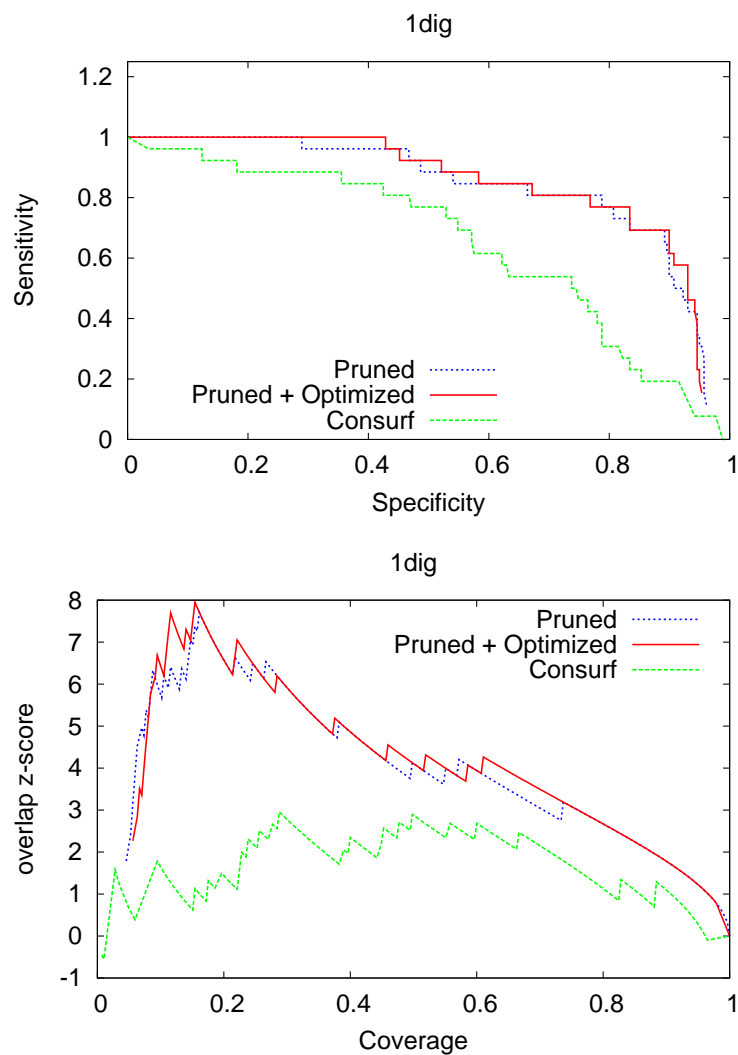

Figure 40: a) The sensitivity and specificity is shown for the pruned, pruned + optimized and the comparison method Consurf for PDBID 1dig. b) The overlap z-scores as a function of coverage for the three methods is shown.

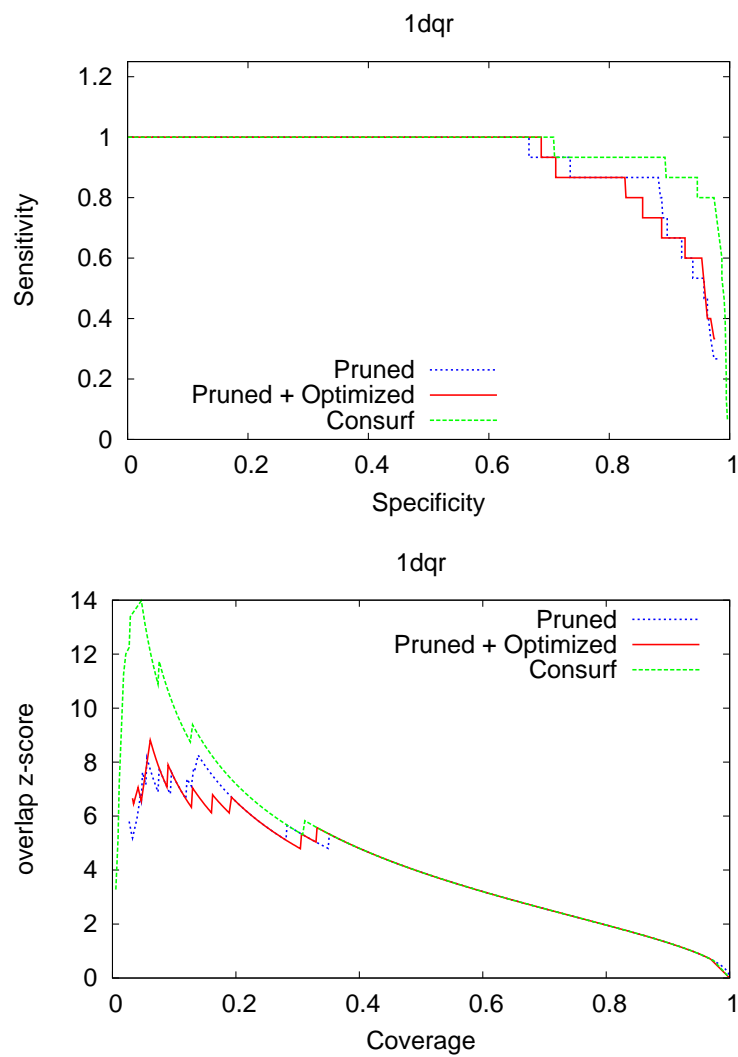

Figure 41: a) The sensitivity and specificity is shown for the pruned, pruned + optimized and the comparison method Consurf for PDBID 1dqr. b) The overlap z-scores as a function of coverage for the three methods is shown.

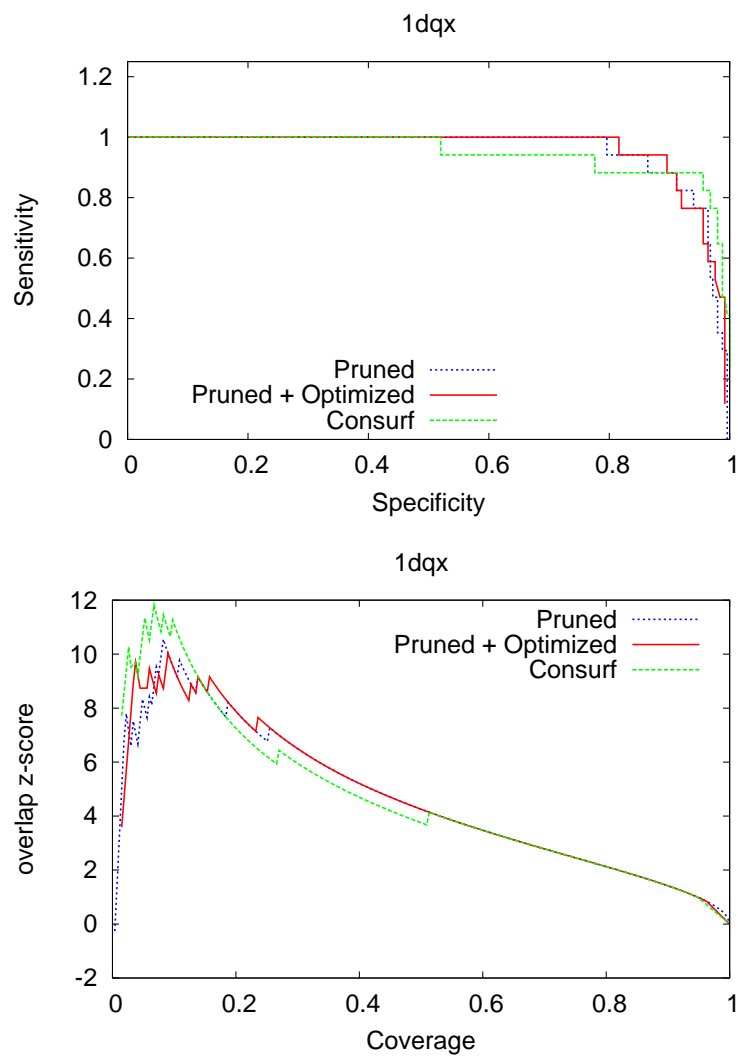

Figure 42: a) The sensitivity and specificity is shown for the pruned, pruned + optimized and the comparison method Consurf for PDBID 1dqx. b) The overlap z-scores as a function of coverage for the three methods is shown.

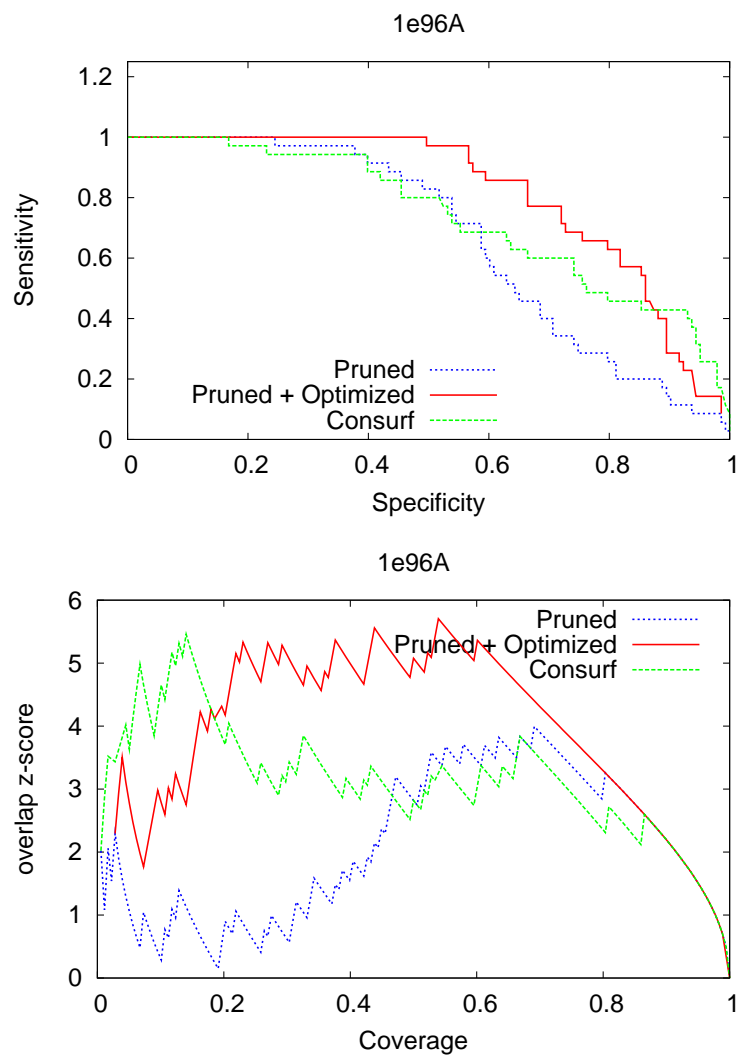

Figure 43: a) The sensitivity and specificity is shown for the pruned, pruned + optimized and the comparison method Consurf for PDBID 1e96A. b) The overlap z-scores as a function of coverage for the three methods is shown.

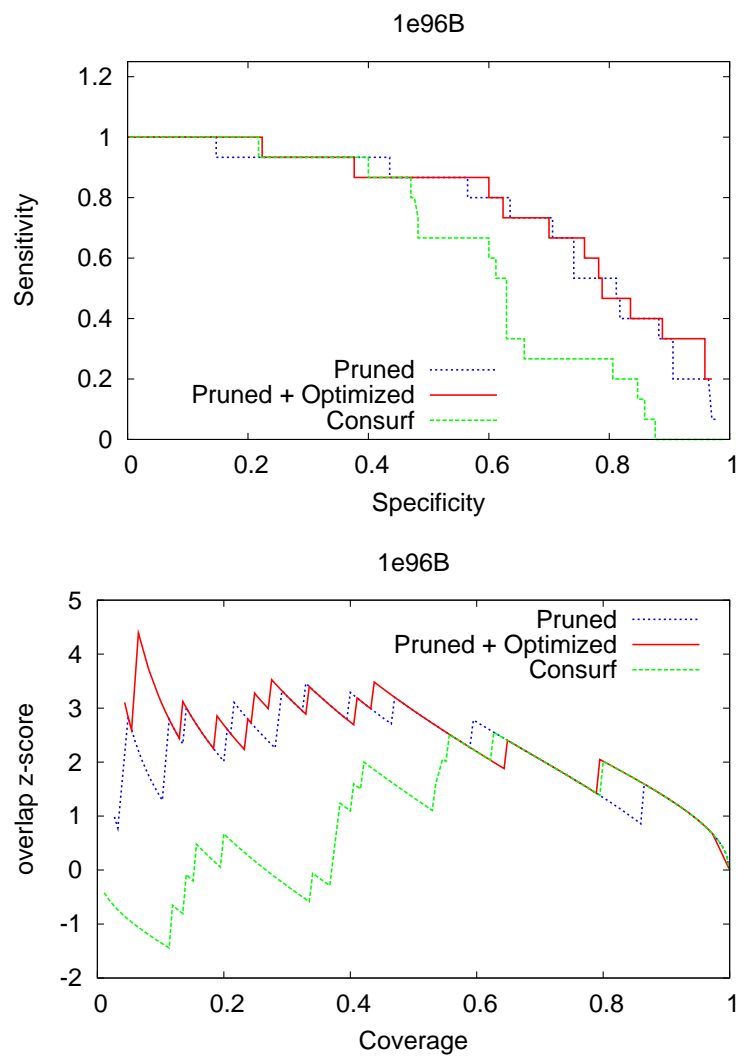

Figure 44: a) The sensitivity and specificity is shown for the pruned, pruned + optimized and the comparison method Consurf for PDBID 1e96B. b) The overlap z-scores as a function of coverage for the three methods is shown.

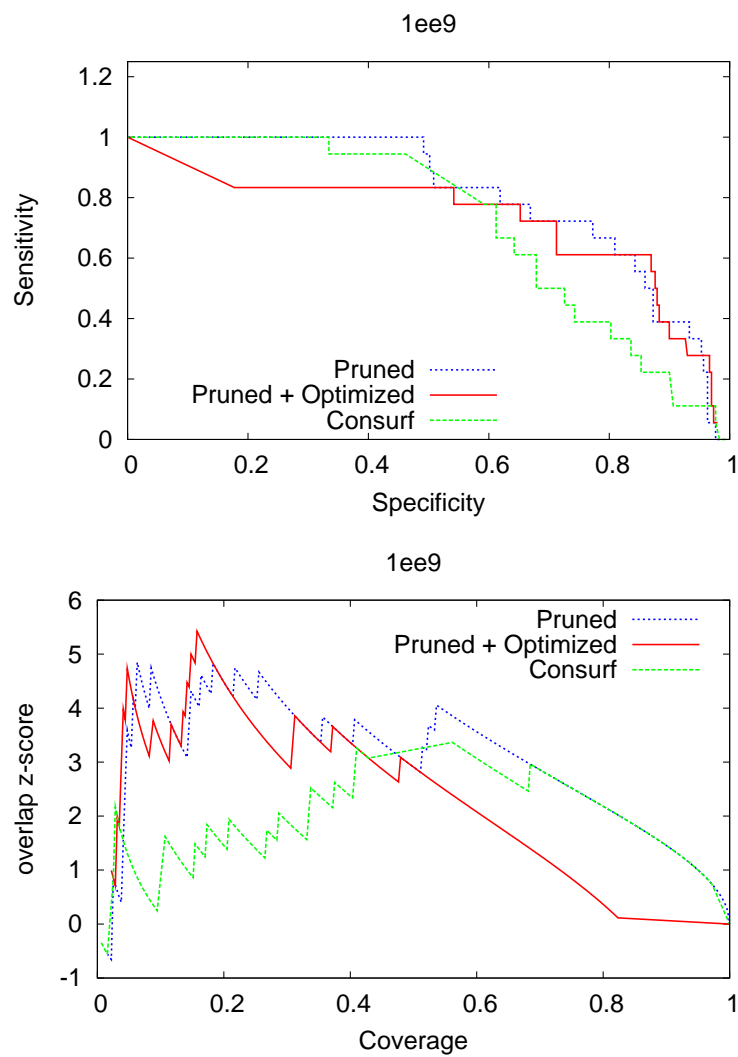

Figure 45: a) The sensitivity and specificity is shown for the pruned, pruned + optimized and the comparison method Consurf for PDBID 1ee9. b) The overlap z-scores as a function of coverage for the three methods is shown.



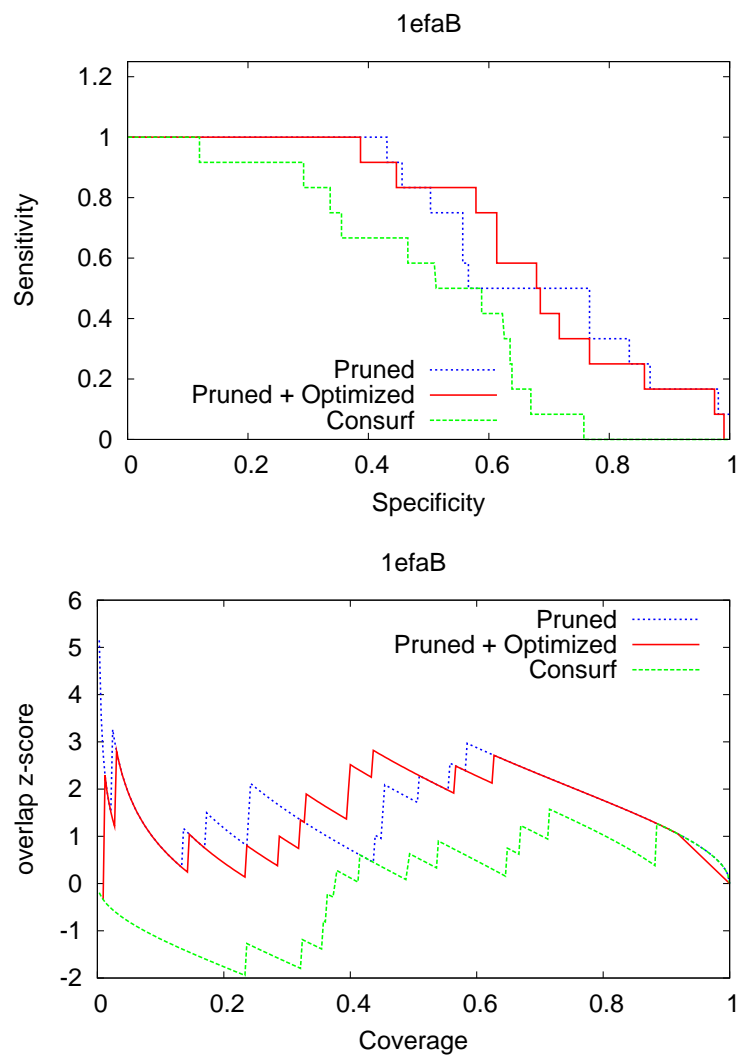

Figure 46: a) The sensitivity and specificity is shown for the pruned, pruned + optimized and the comparison method Consurf for PDBID 1efaB. b) The overlap z-scores as a function of coverage for the three methods is shown.

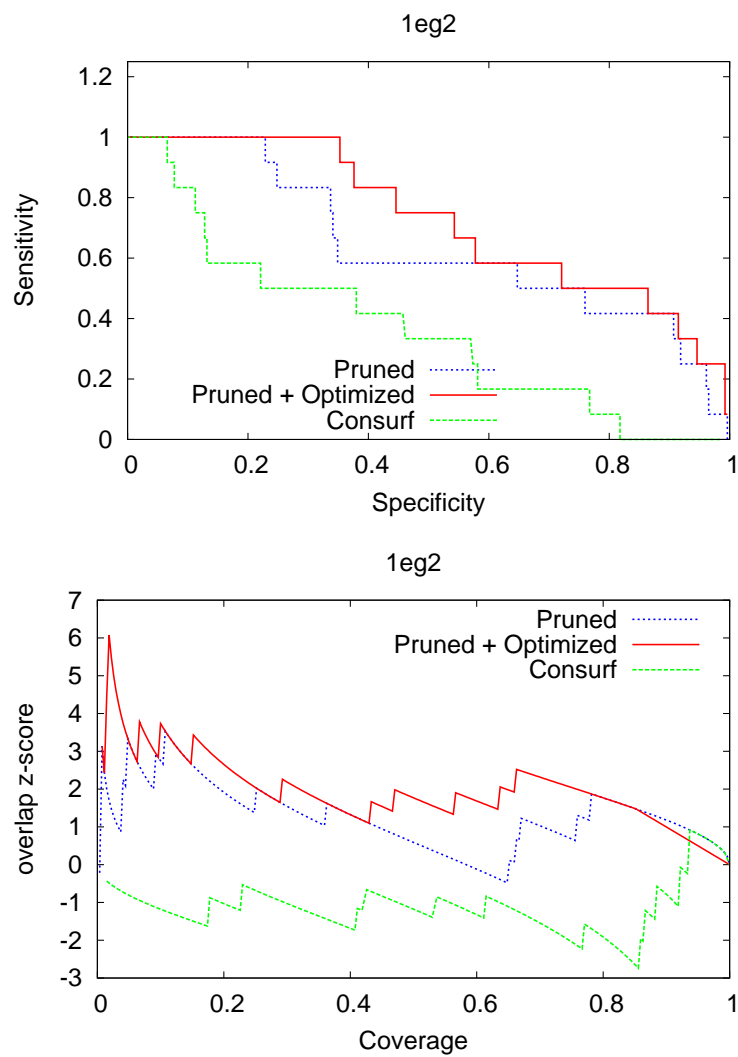

Figure 47: a) The sensitivity and specificity is shown for the pruned, pruned + optimized and the comparison method Consurf for PDBID 1eg2. b) The overlap z-scores as a function of coverage for the three methods is shown.

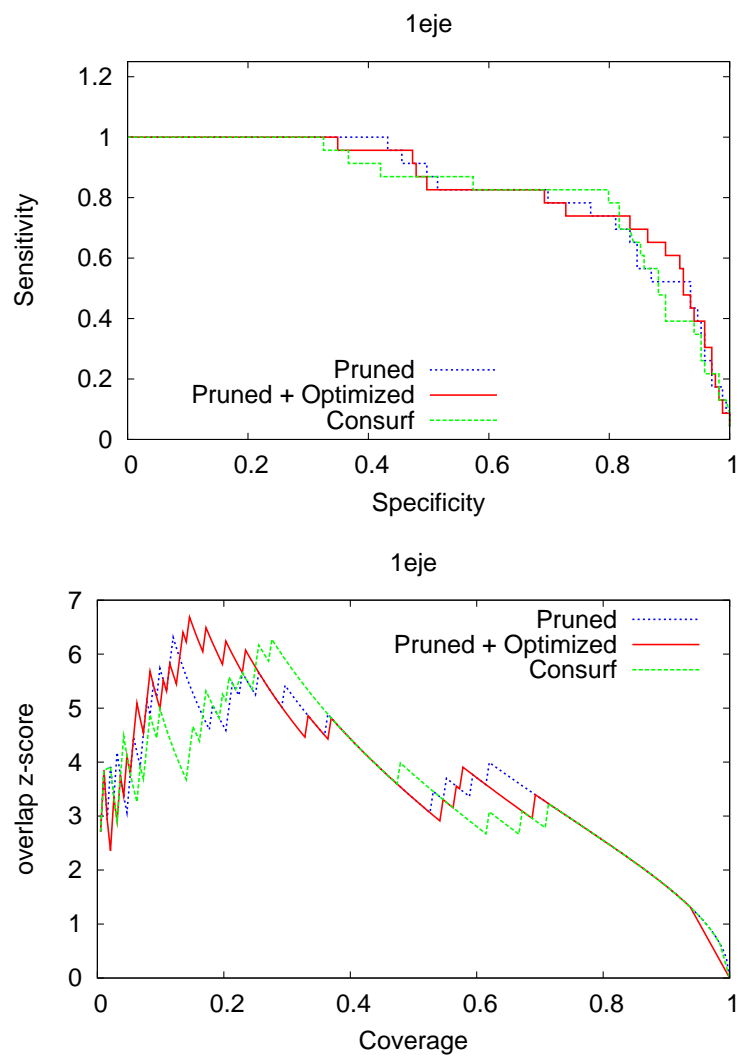

Figure 48: a) The sensitivity and specificity is shown for the pruned, pruned + optimized and the comparison method Consurf for PDBID 1eje. b) The overlap z-scores as a function of coverage for the three methods is shown.

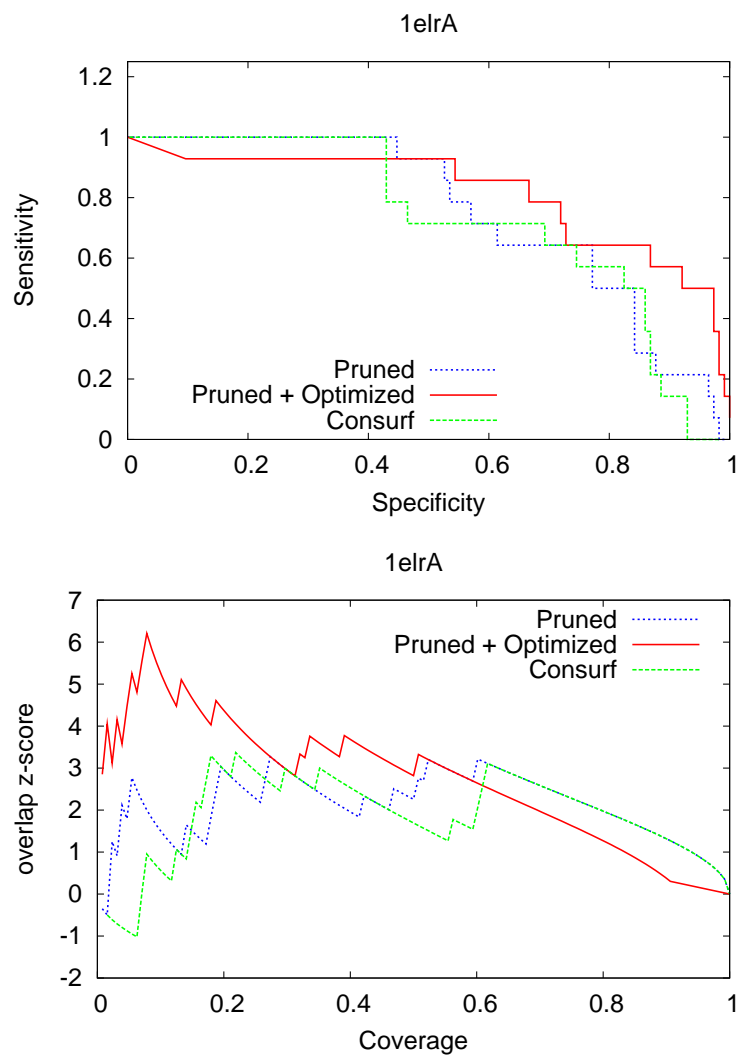

Figure 49: a) The sensitivity and specificity is shown for the pruned, pruned + optimized and the comparison method Consurf for PDBID 1elrA. b) The overlap z-scores as a function of coverage for the three methods is shown.

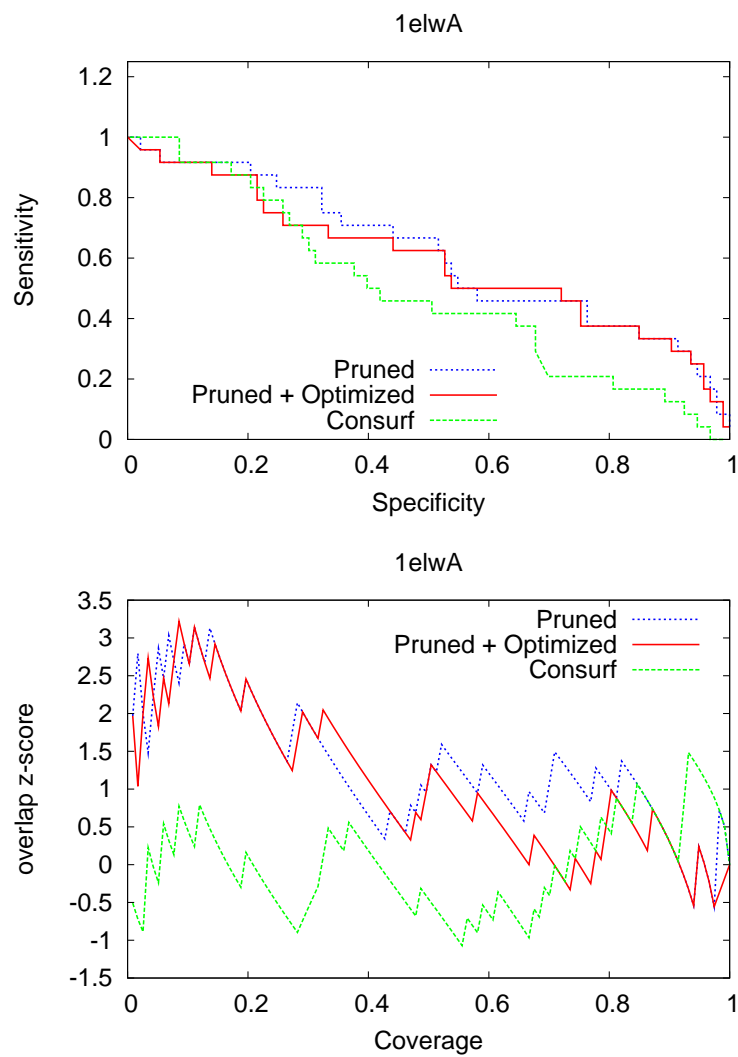

Figure 50: a) The sensitivity and specificity is shown for the pruned, pruned + optimized and the comparison method Consurf for PDBID 1elwA. b) The overlap z-scores as a function of coverage for the three methods is shown.

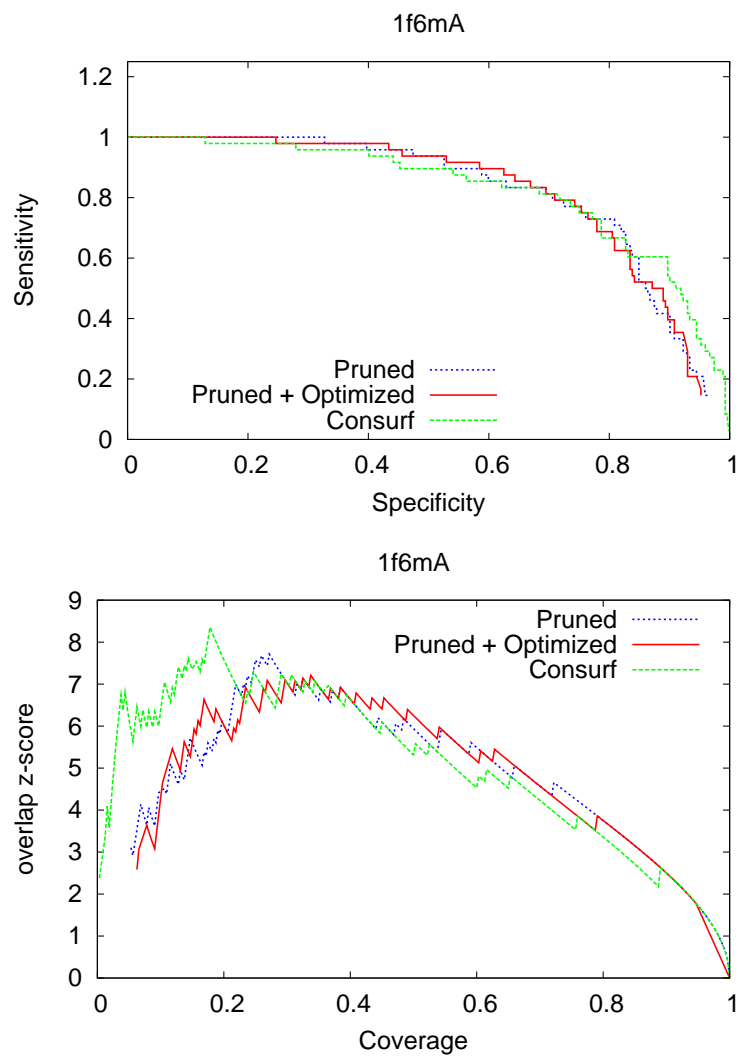

Figure 51: a) The sensitivity and specificity is shown for the pruned, pruned + optimized and the comparison method Consurf for PDBID 1f6mA. b) The overlap z-scores as a function of coverage for the three methods is shown.

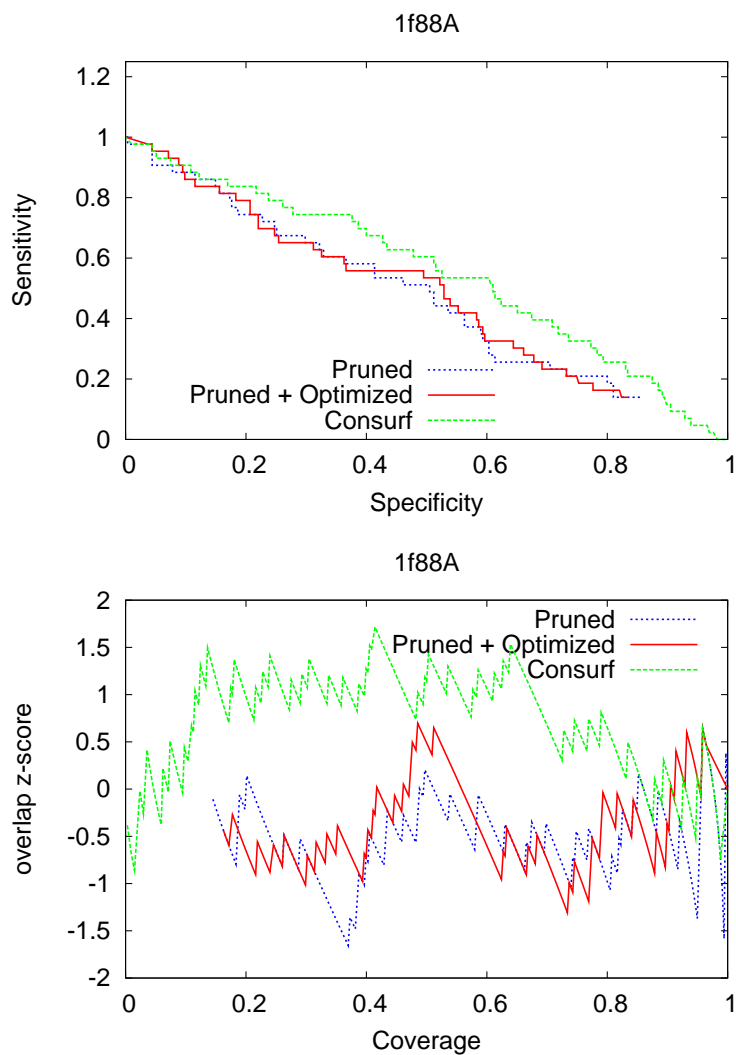

Figure 52: a) The sensitivity and specificity is shown for the pruned, pruned + optimized and the comparison method Consurf for PDBID 1f88A. b) The overlap z-scores as a function of coverage for the three methods is shown.

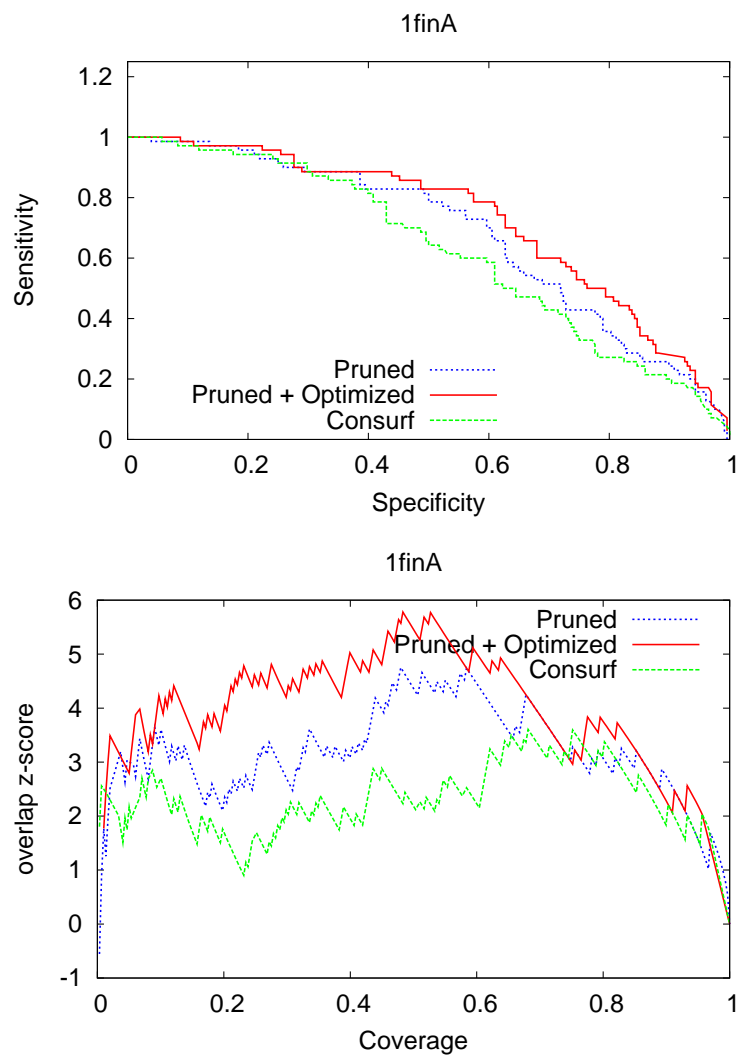

Figure 53: a) The sensitivity and specificity is shown for the pruned, pruned + optimized and the comparison method Consurf for PDBID 1finA. b) The overlap z-scores as a function of coverage for the three methods is shown.



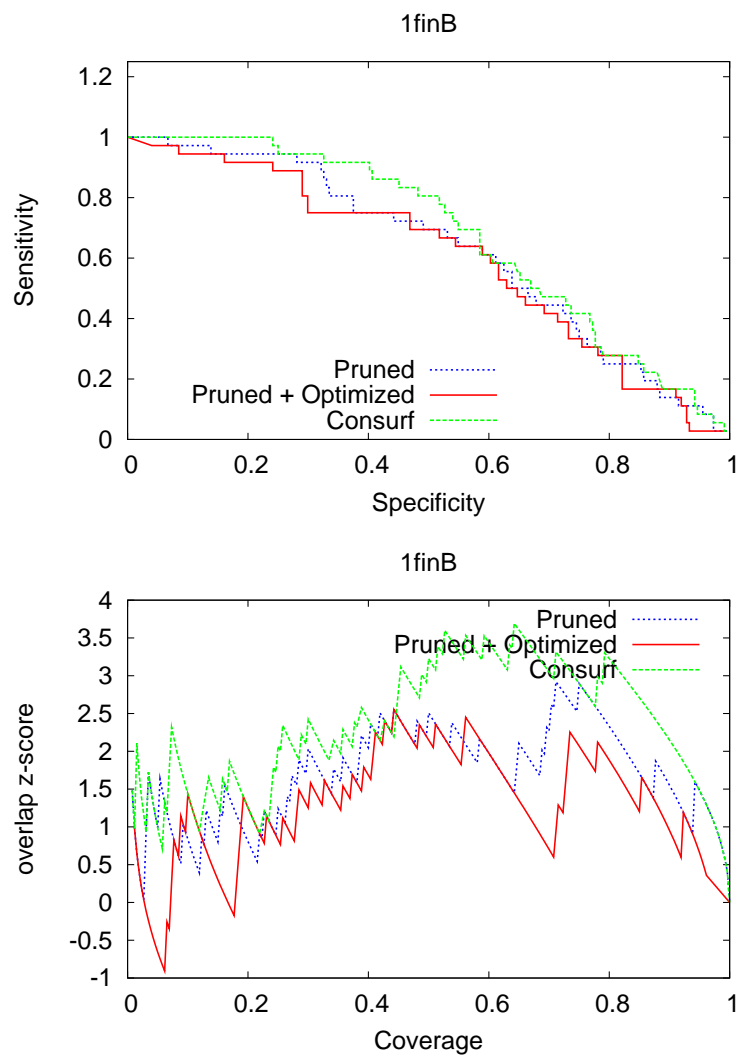

Figure 54: a) The sensitivity and specificity is shown for the pruned, pruned + optimized and the comparison method Consurf for PDBID 1finB. b) The overlap z-scores as a function of coverage for the three methods is shown.

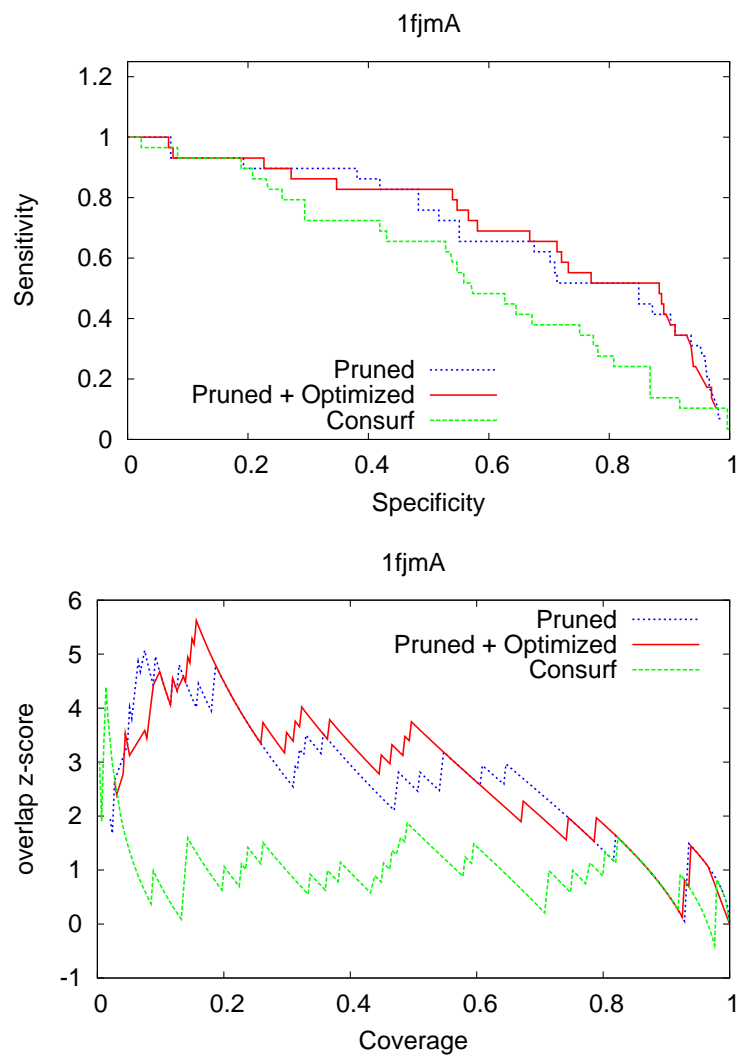

Figure 55: a) The sensitivity and specificity is shown for the pruned, pruned + optimized and the comparison method Consurf for PDBID 1fjmA. b) The overlap z-scores as a function of coverage for the three methods is shown.

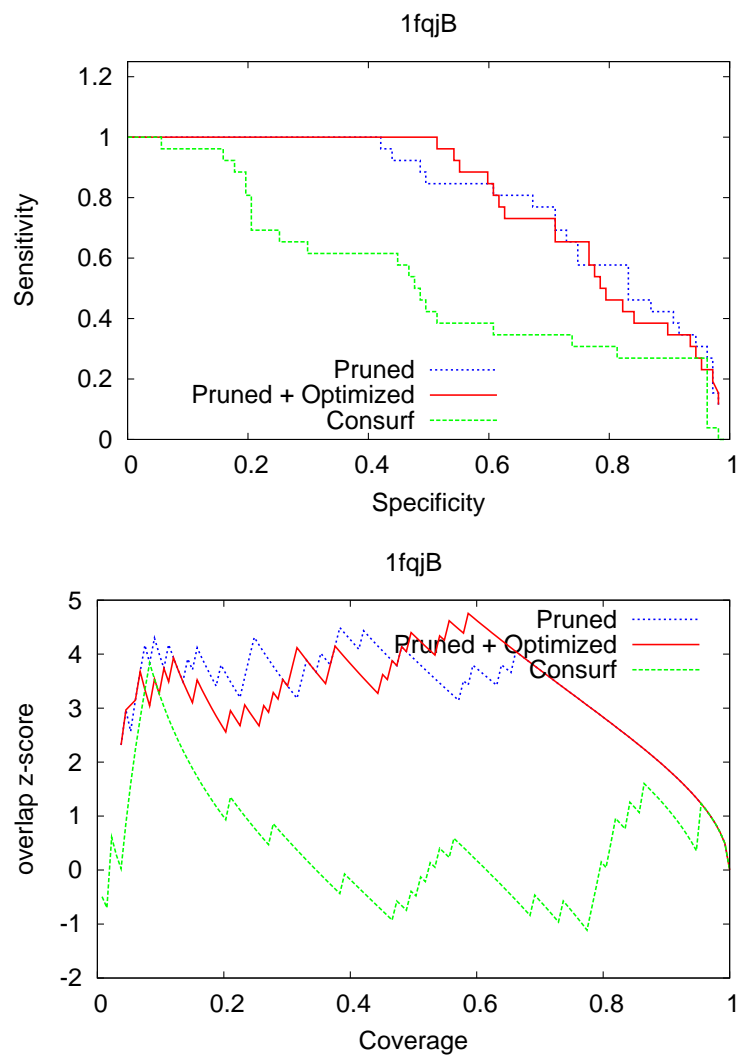

Figure 56: a) The sensitivity and specificity is shown for the pruned, pruned + optimized and the comparison method Consurf for PDBID 1fqjB. b) The overlap z-scores as a function of coverage for the three methods is shown.

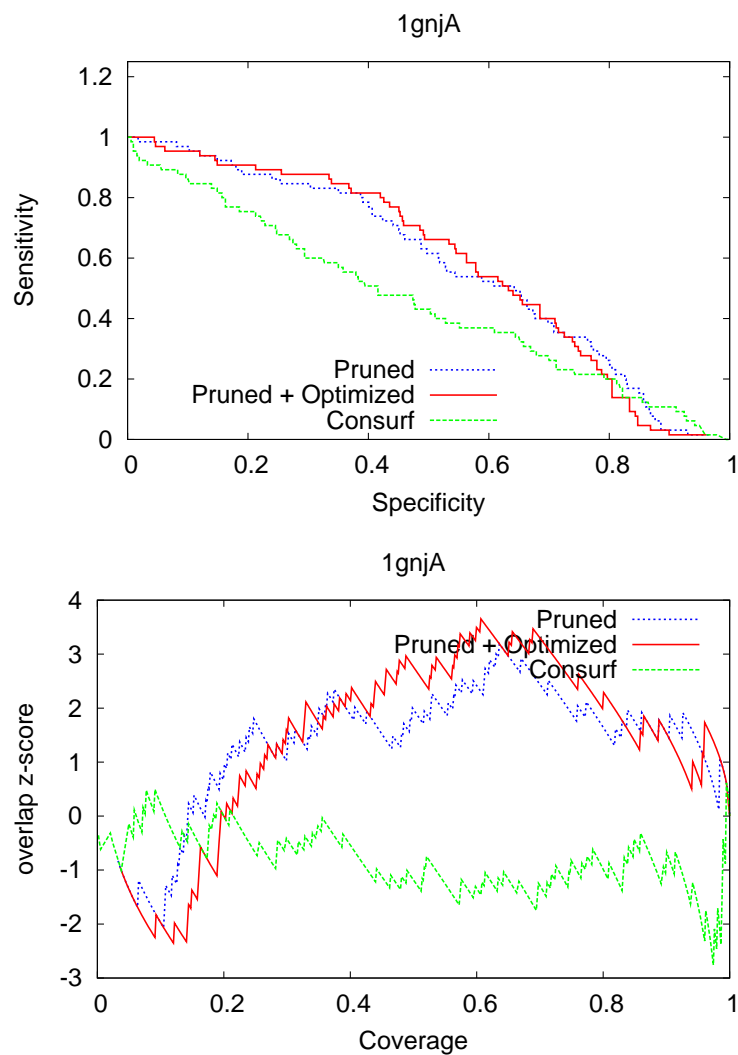

Figure 57: a) The sensitivity and specificity is shown for the pruned, pruned + optimized and the comparison method Consurf for PDBID 1gnjA. b) The overlap z-scores as a function of coverage for the three methods is shown.

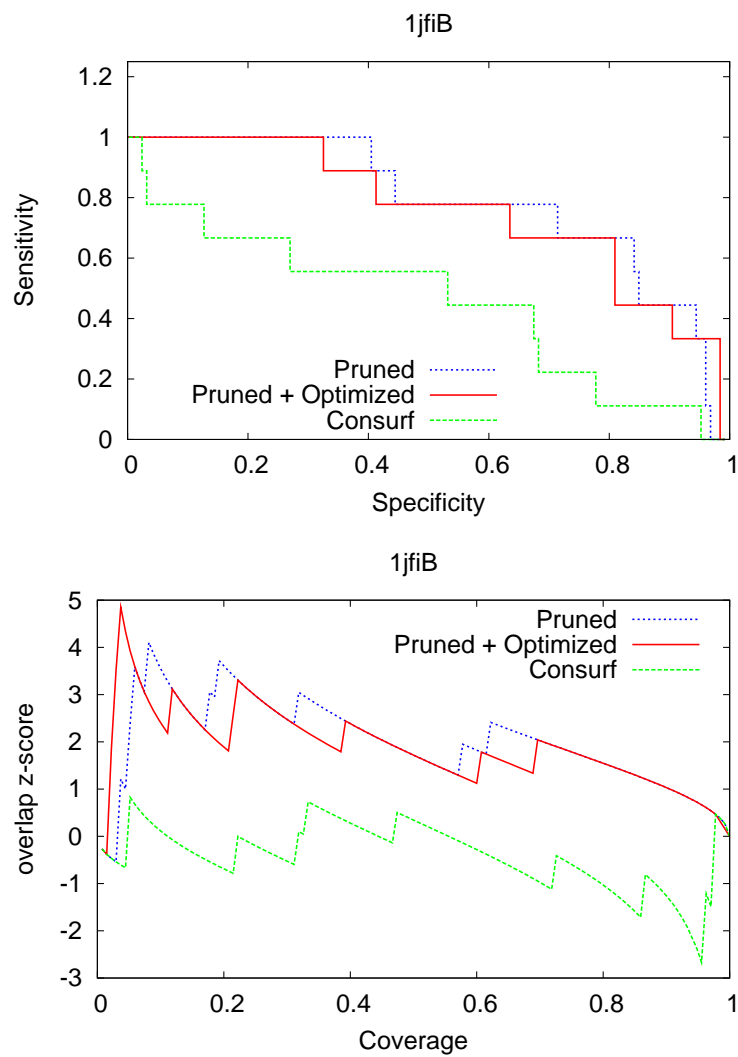

Figure 58: a) The sensitivity and specificity is shown for the pruned, pruned + optimized and the comparison method Consurf for PDBID 1jfiB. b) The overlap z-scores as a function of coverage for the three methods is shown.

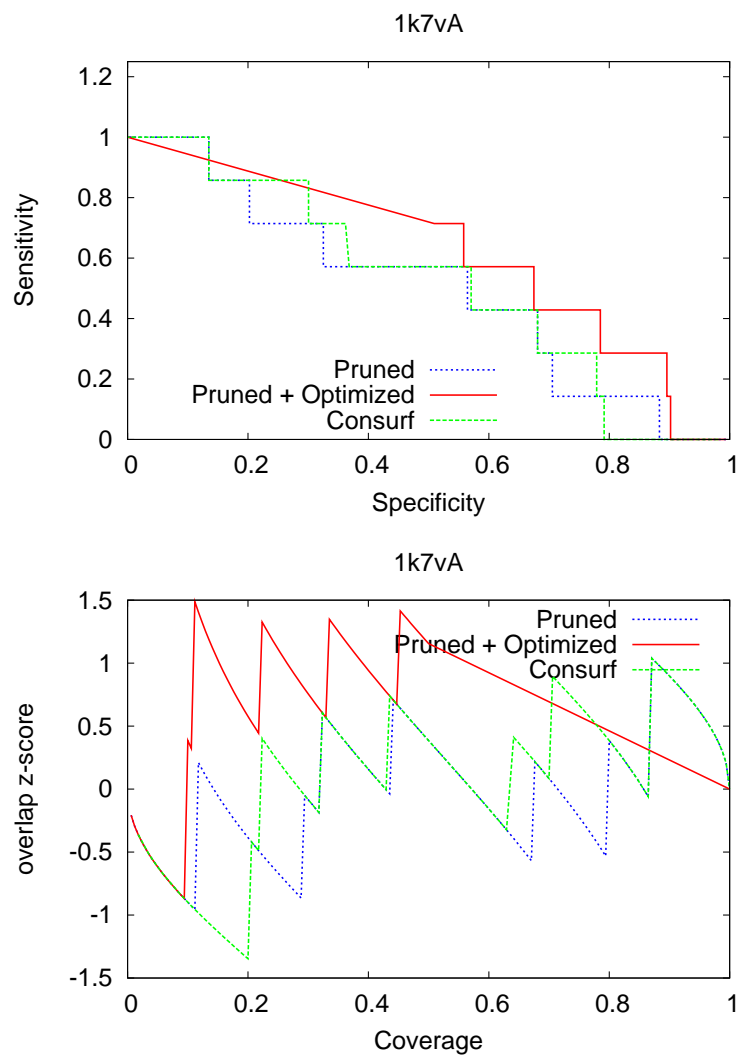

Figure 59: a) The sensitivity and specificity is shown for the pruned, pruned + optimized and the comparison method Consurf for PDBID 1k7vA. b) The overlap z-scores as a function of coverage for the three methods is shown.

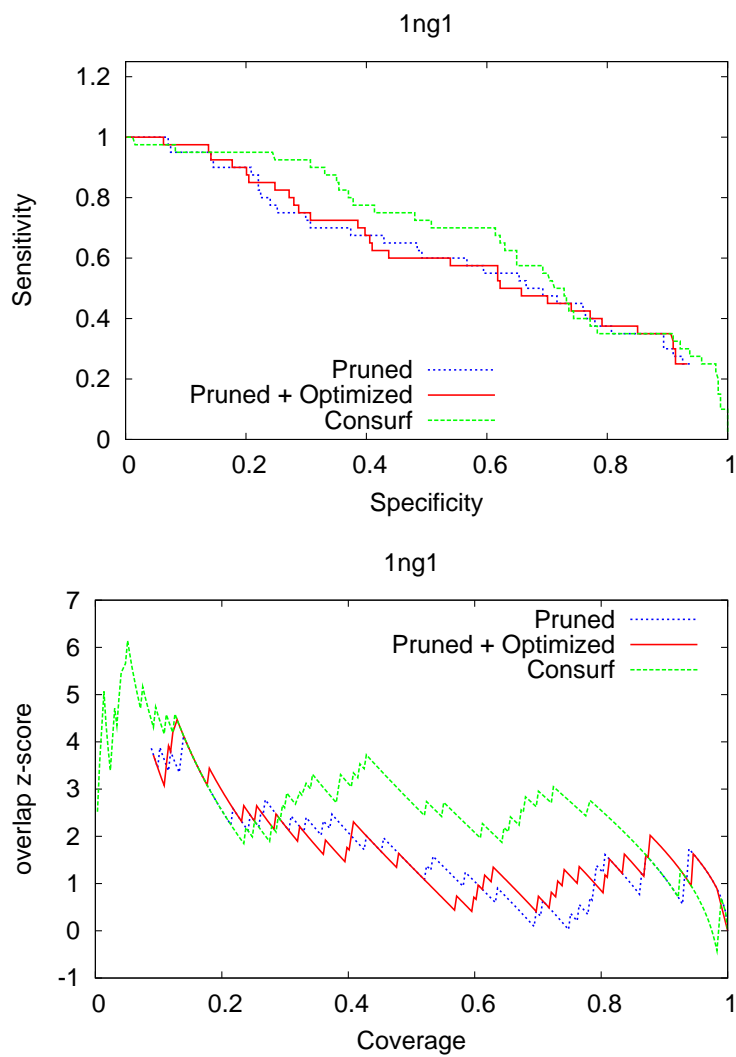

Figure 60: a) The sensitivity and specificity is shown for the pruned, pruned + optimized and the comparison method Consurf for PDBID 1ng1. b) The overlap z-scores as a function of coverage for the three methods is shown.

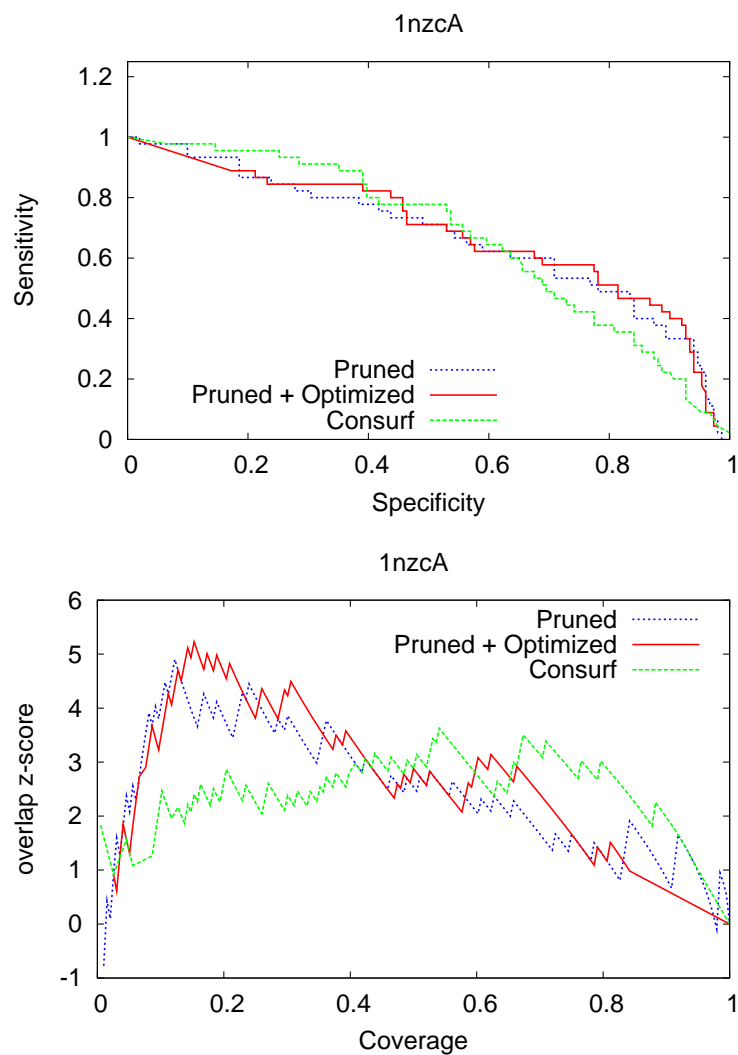

Figure 61: a) The sensitivity and specificity is shown for the pruned, pruned + optimized and the comparison method Consurf for PDBID 1nzcA. b) The overlap z-scores as a function of coverage for the three methods is shown.



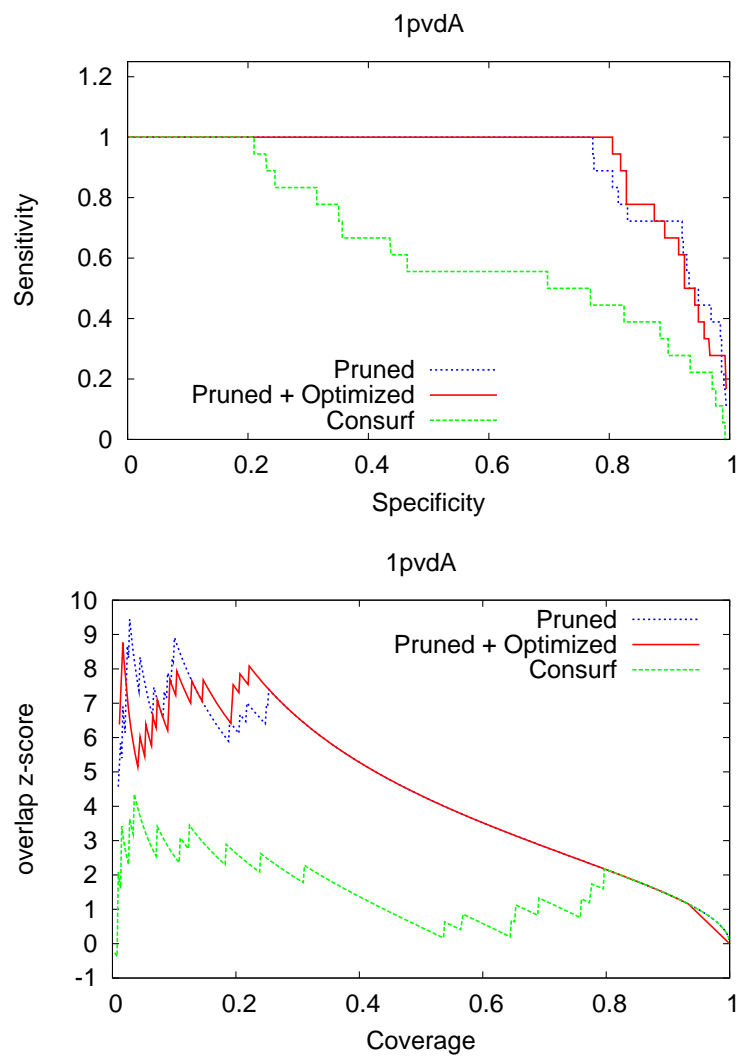

Figure 62: a) The sensitivity and specificity is shown for the pruned, pruned + optimized and the comparison method Consurf for PDBID 1pvdA. b) The overlap z-scores as a function of coverage for the three methods is shown.

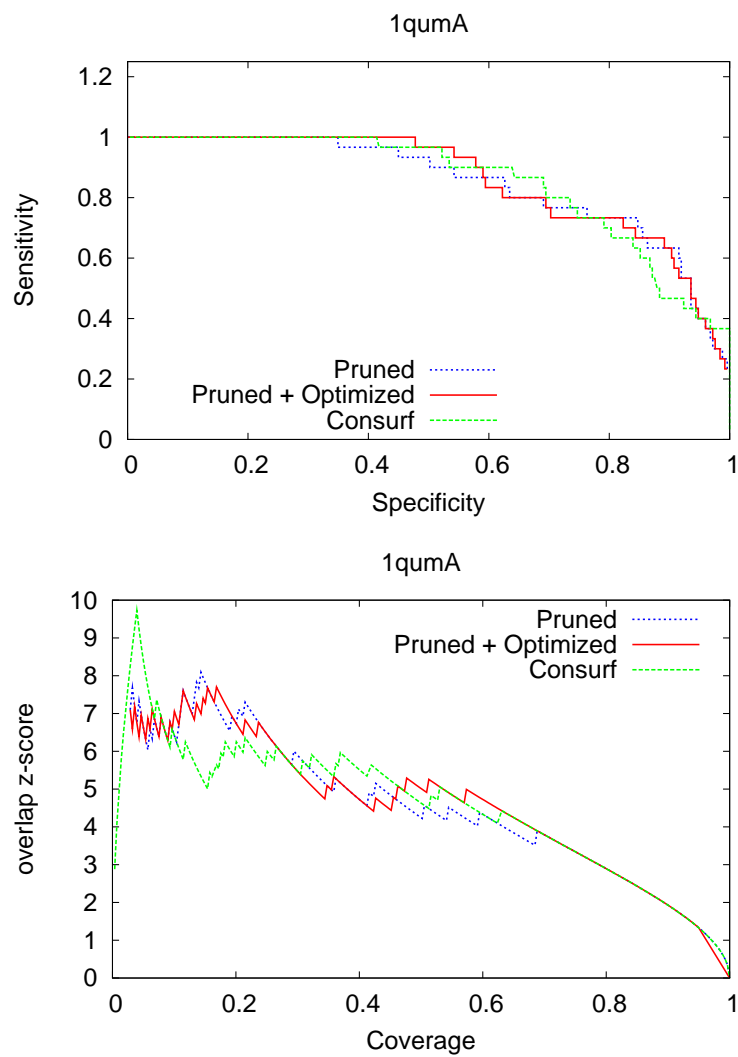

Figure 63: a) The sensitivity and specificity is shown for the pruned, pruned + optimized and the comparison method Consurf for PDBID 1qumA. b) The overlap z-scores as a function of coverage for the three methods is shown.

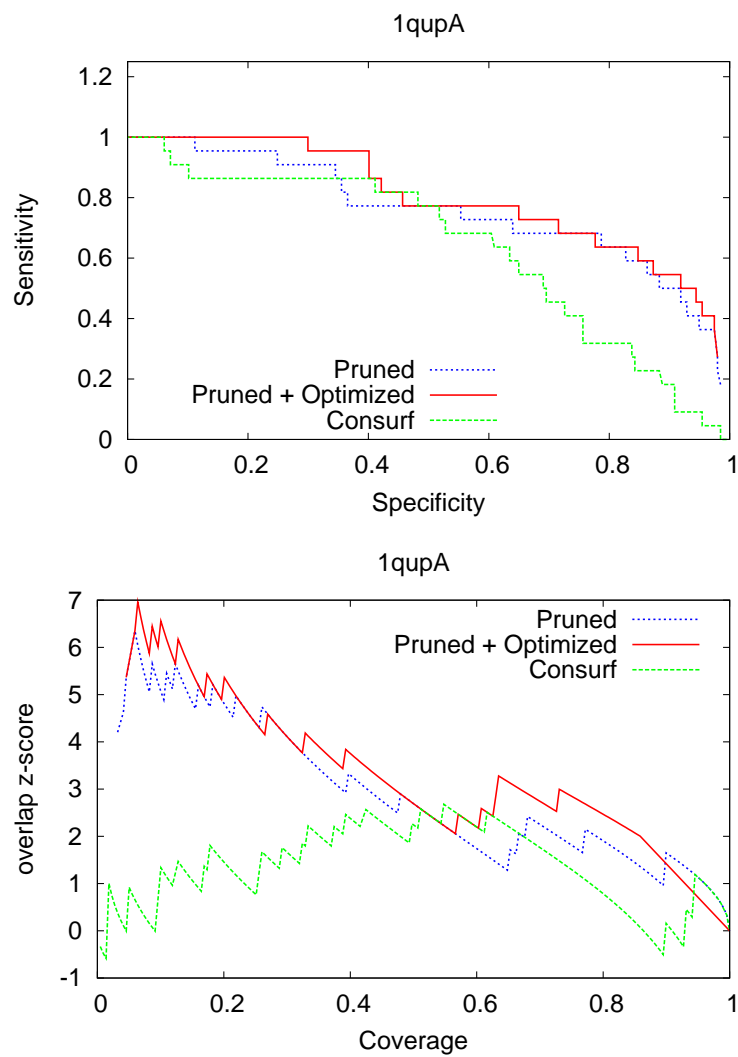

Figure 64: a) The sensitivity and specificity is shown for the pruned, pruned + optimized and the comparison method Consurf for PDBID 1qpA. b) The overlap z-scores as a function of coverage for the three methods is shown.

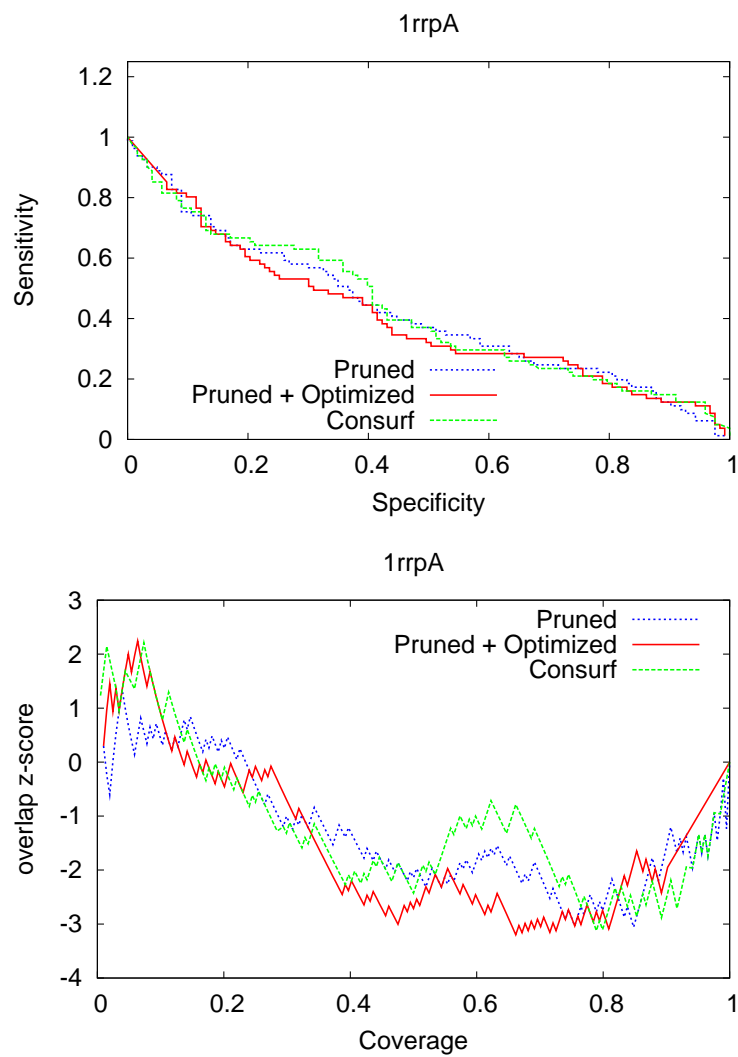

Figure 65: a) The sensitivity and specificity is shown for the pruned, pruned + optimized and the comparison method Consurf for PDBID 1rrpA. b) The overlap z-scores as a function of coverage for the three methods is shown.

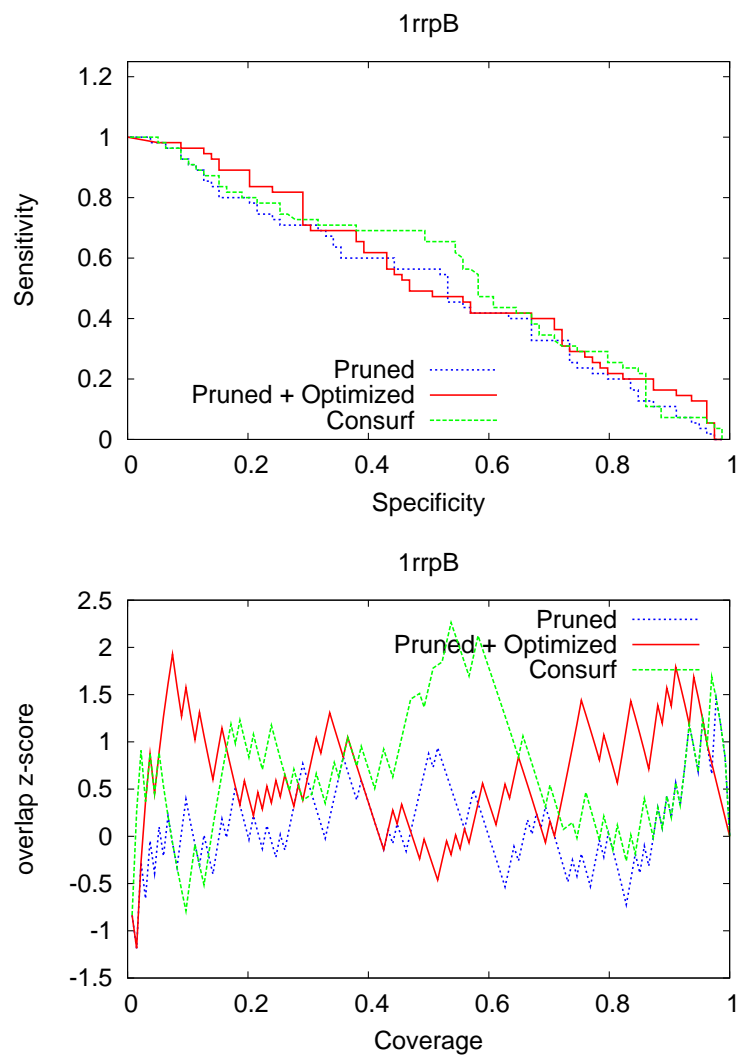

Figure 66: a) The sensitivity and specificity is shown for the pruned, pruned + optimized and the comparison method Consurf for PDBID 1rrpB. b) The overlap z-scores as a function of coverage for the three methods is shown.

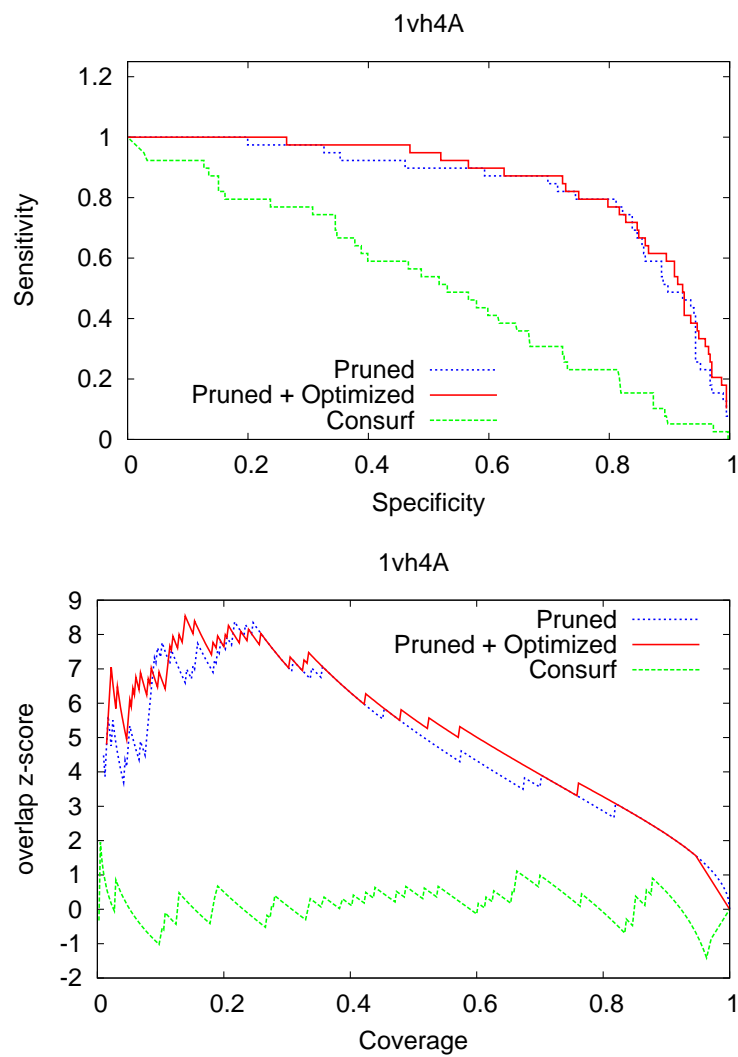

Figure 67: a) The sensitivity and specificity is shown for the pruned, pruned + optimized and the comparison method Consurf for PDBID 1vh4A. b) The overlap z-scores as a function of coverage for the three methods is shown.

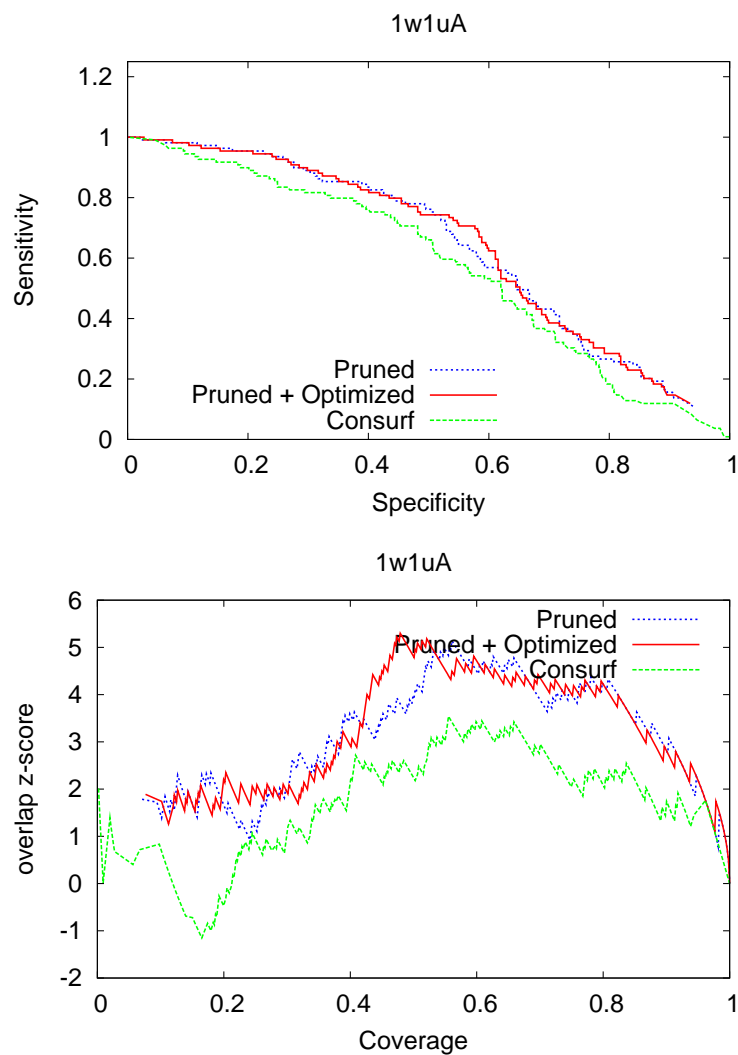

Figure 68: a) The sensitivity and specificity is shown for the pruned, pruned + optimized and the comparison method Consurf for PDBID 1w1uA. b) The overlap z-scores as a function of coverage for the three methods is shown.

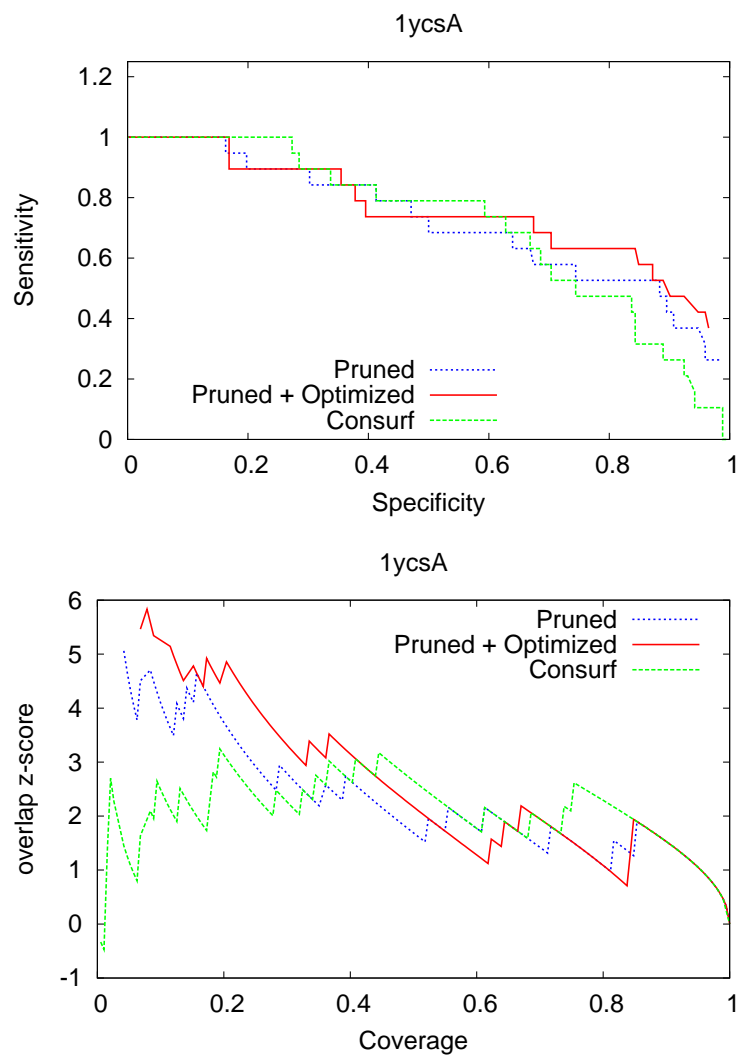

Figure 69: a) The sensitivity and specificity is shown for the pruned, pruned + optimized and the comparison method Consurf for PDBID 1ycsA. b) The overlap z-scores as a function of coverage for the three methods is shown.



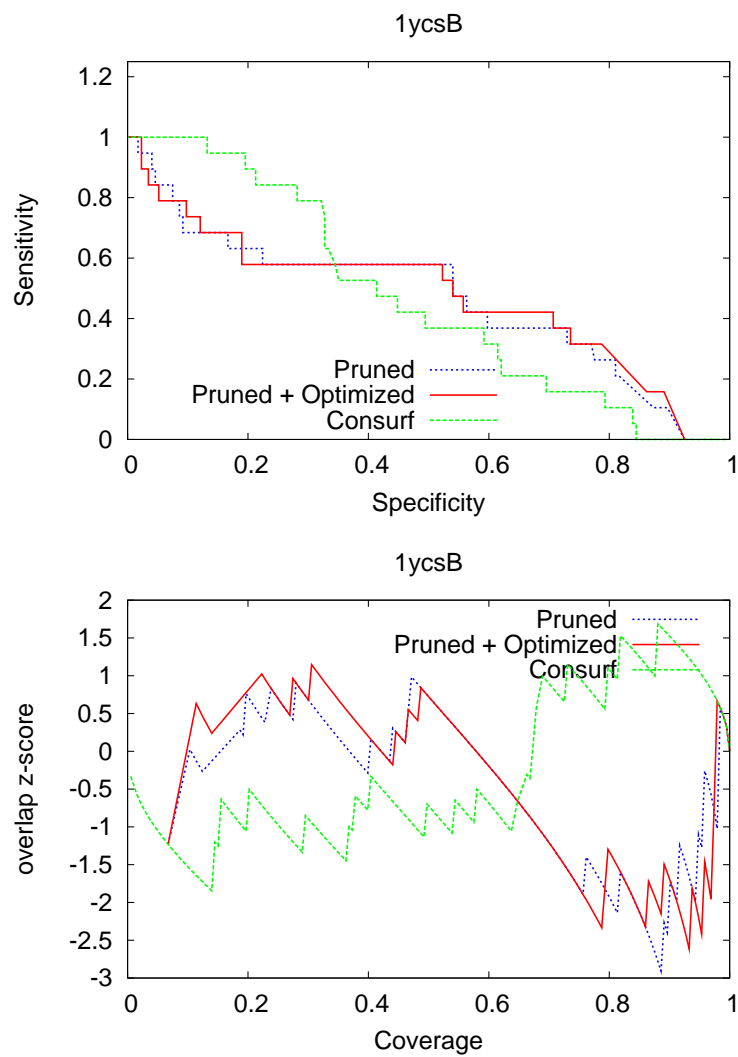

Figure 70: a) The sensitivity and specificity is shown for the pruned, pruned + optimized and the comparison method Consurf for PDBID 1ycsB. b) The overlap z-scores as a function of coverage for the three methods is shown.

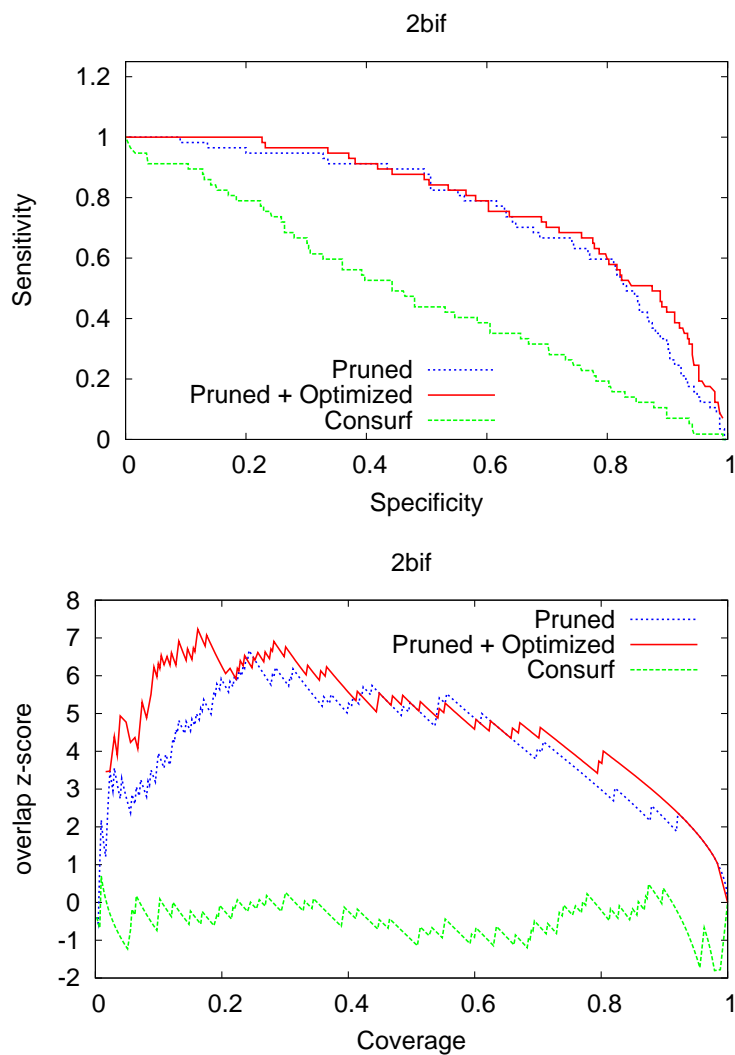

Figure 71: a) The sensitivity and specificity is shown for the pruned, pruned + optimized and the comparison method Consurf for PDBID 2bif. b) The overlap z-scores as a function of coverage for the three methods is shown.

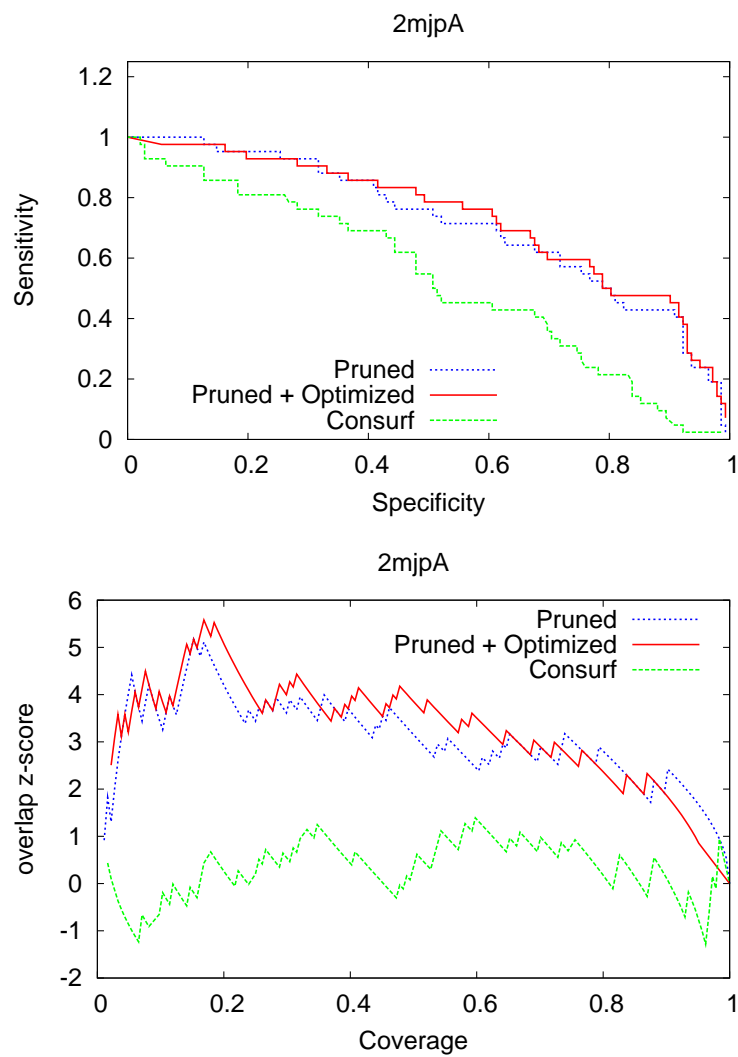

Figure 72: a) The sensitivity and specificity is shown for the pruned, pruned + optimized and the comparison method Consurf for PDBID 2mjpA. b) The overlap z-scores as a function of coverage for the three methods is shown.

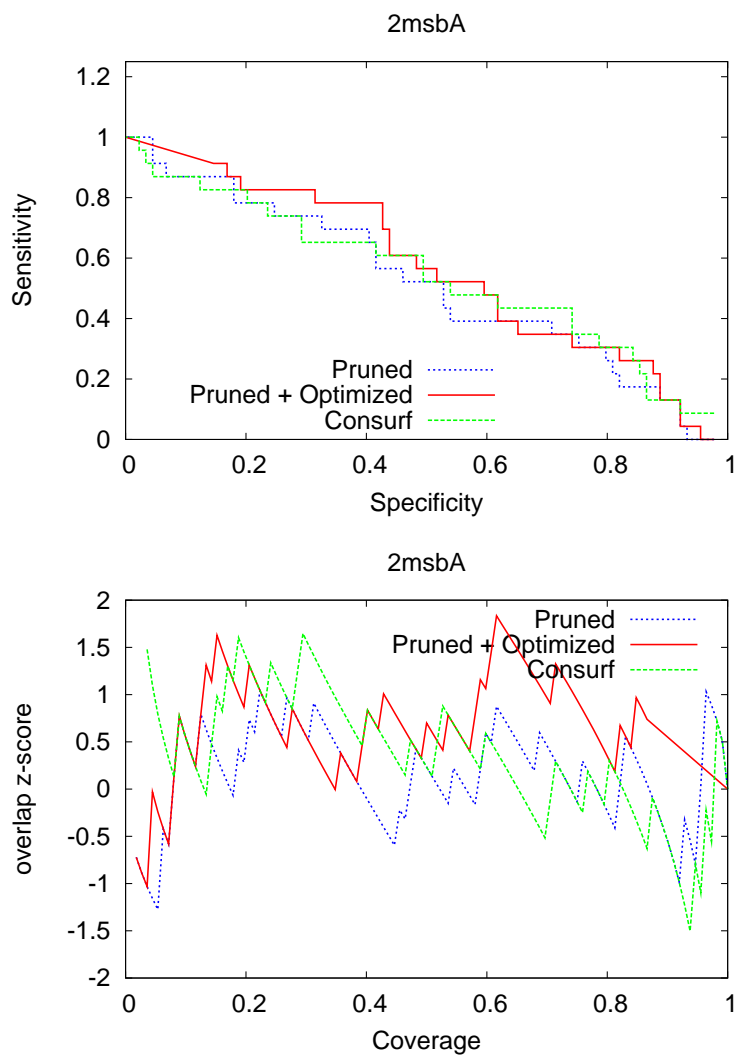

Figure 73: a) The sensitivity and specificity is shown for the pruned, pruned + optimized and the comparison method Consurf for PDBID 2msbA. b) The overlap z-scores as a function of coverage for the three methods is shown.

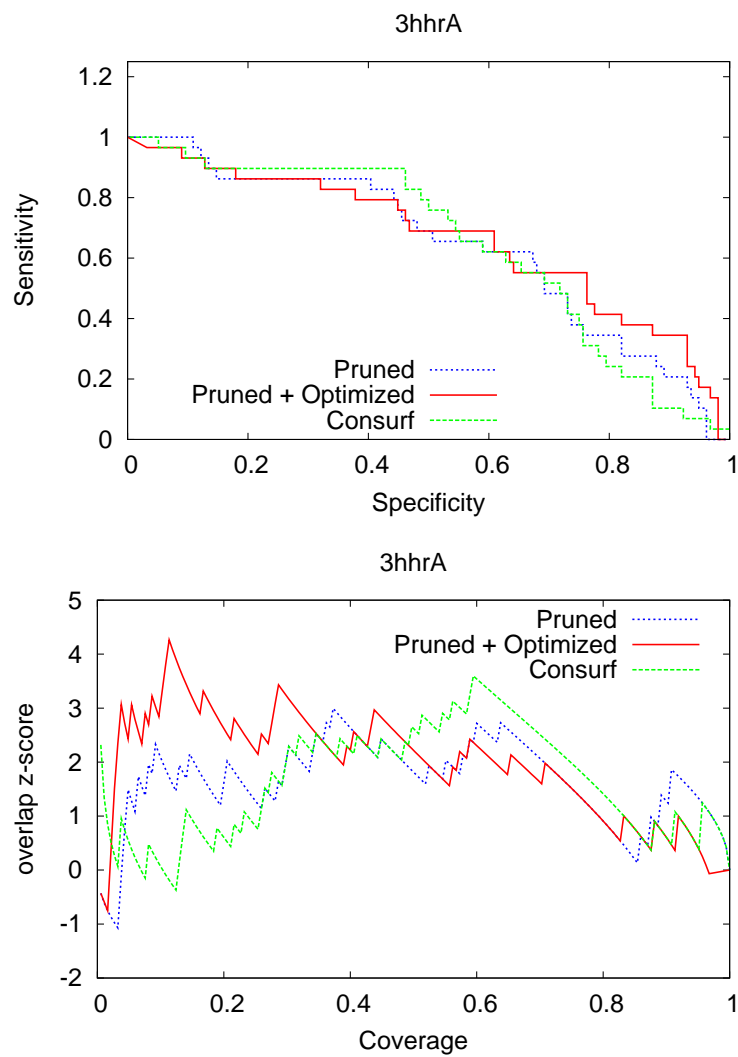

Figure 74: a) The sensitivity and specificity is shown for the pruned, pruned + optimized and the comparison method Consurf for PDBID 3hrA. b) The overlap z-scores as a function of coverage for the three methods is shown.

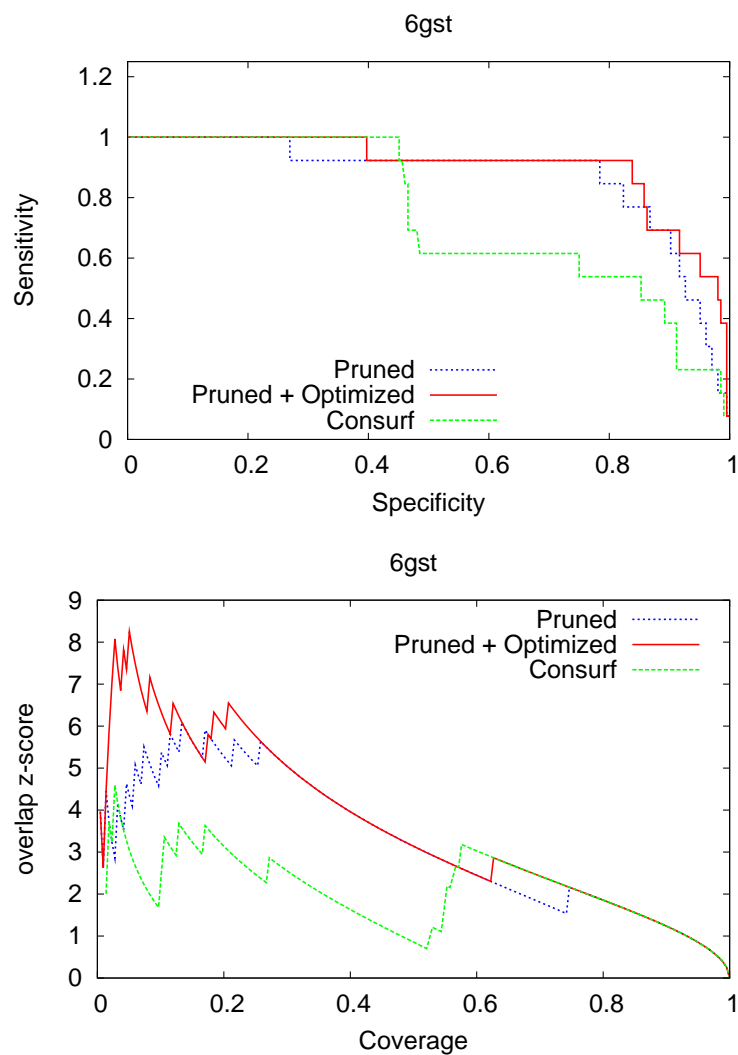

Figure 75: a) The sensitivity and specificity is shown for the pruned, pruned + optimized and the comparison method Consurf for PDBID 6gst. b) The overlap z-scores as a function of coverage for the three methods is shown.

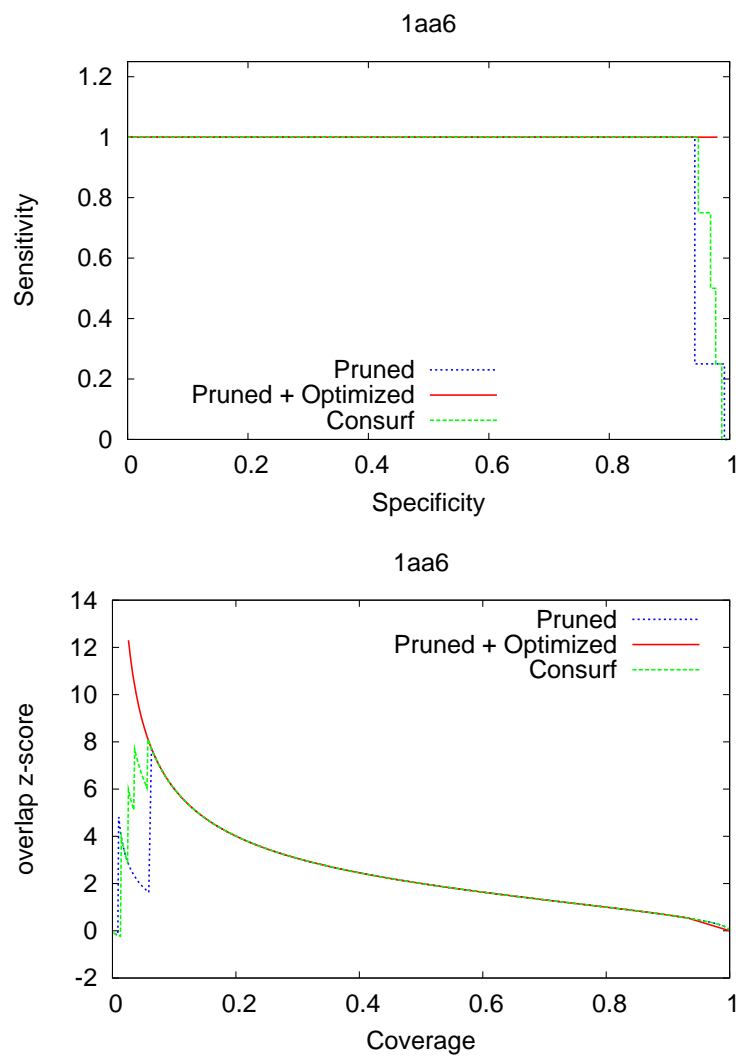

Figure 76: a) The sensitivity and specificity is shown for the pruned, pruned + optimized and the comparison method Consurf for PDBID 1aa6. b) The overlap z-scores as a function of rank coverage for the three methods is shown.

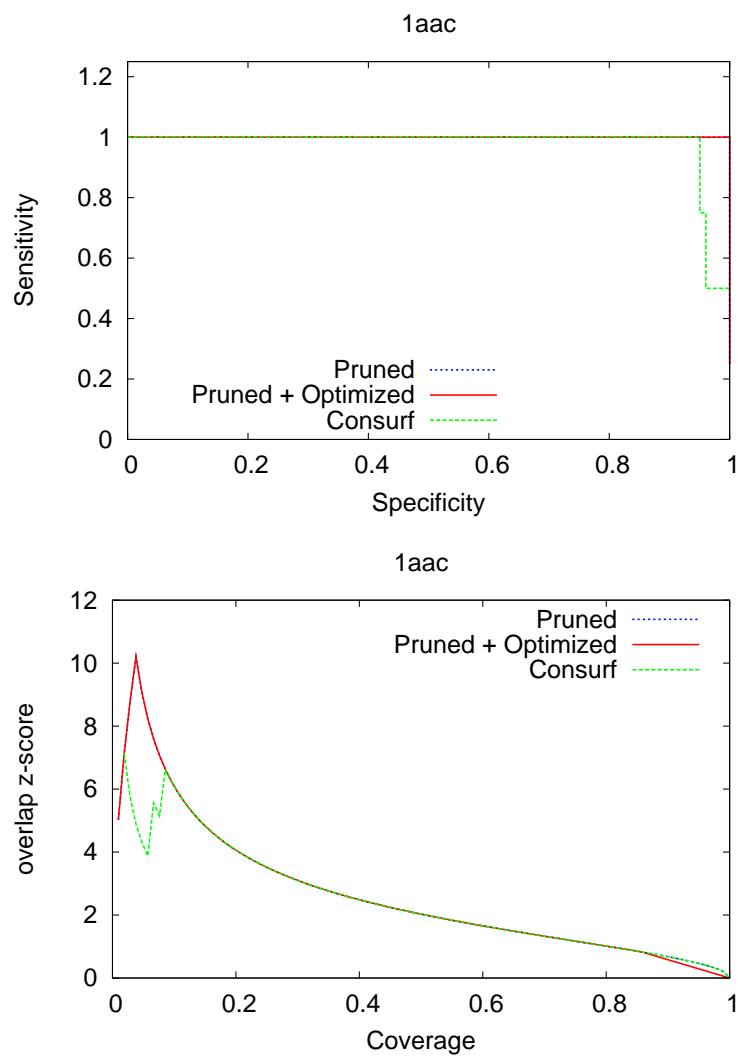

Figure 77: a) The sensitivity and specificity is shown for the pruned, pruned + optimized and the comparison method Consurf for PDBID 1aac. b) The overlap z-scores as a function of rank coverage for the three methods is shown.



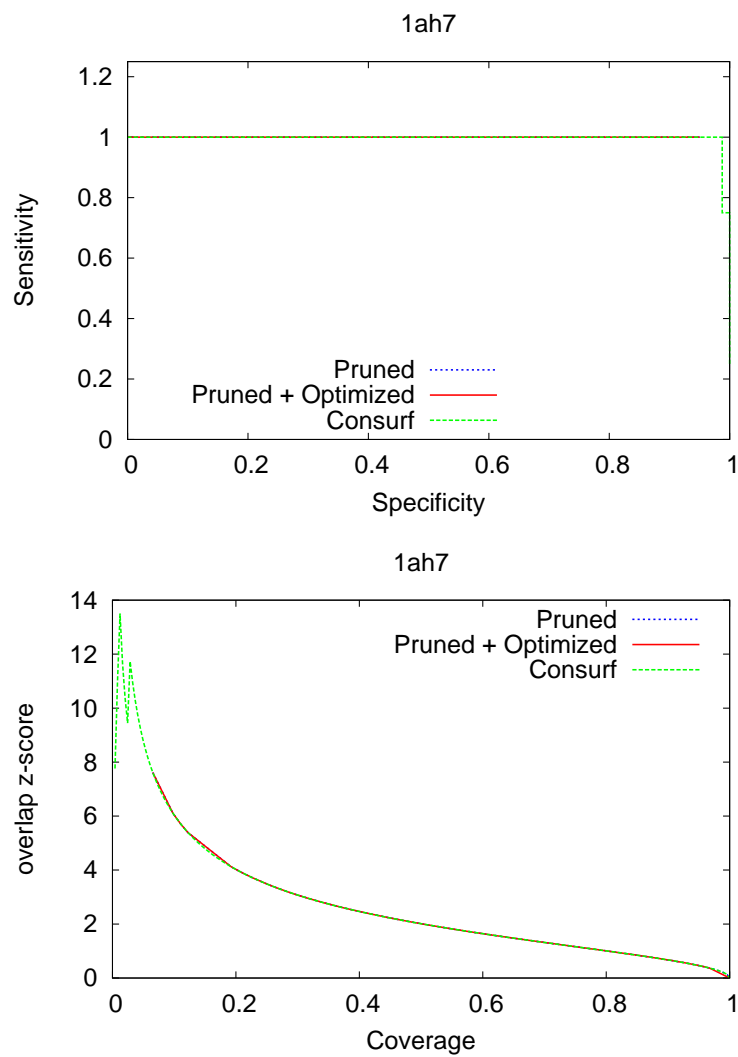

Figure 78: a) The sensitivity and specificity is shown for the pruned, pruned + optimized and the comparison method Consurf for PDBID 1ah7. b) The overlap z-scores as a function of rank coverage for the three methods is shown.

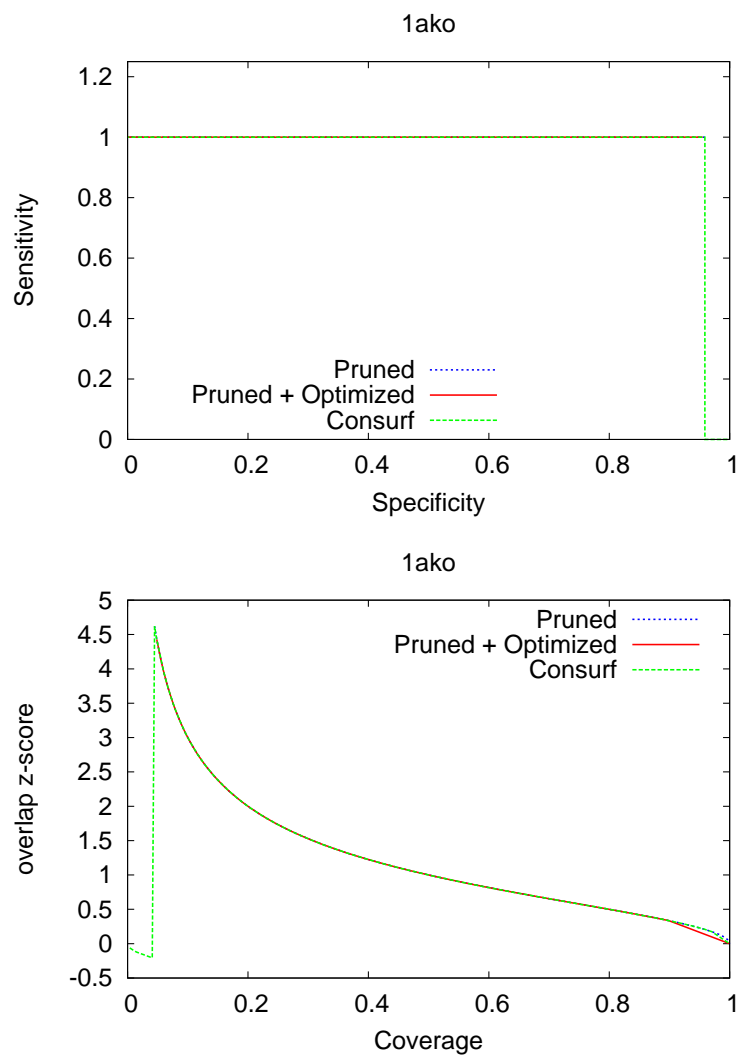

Figure 79: a) The sensitivity and specificity is shown for the pruned, pruned + optimized and the comparison method Consurf for PDBID 1ako. b) The overlap z-scores as a function of rank coverage for the three methods is shown.

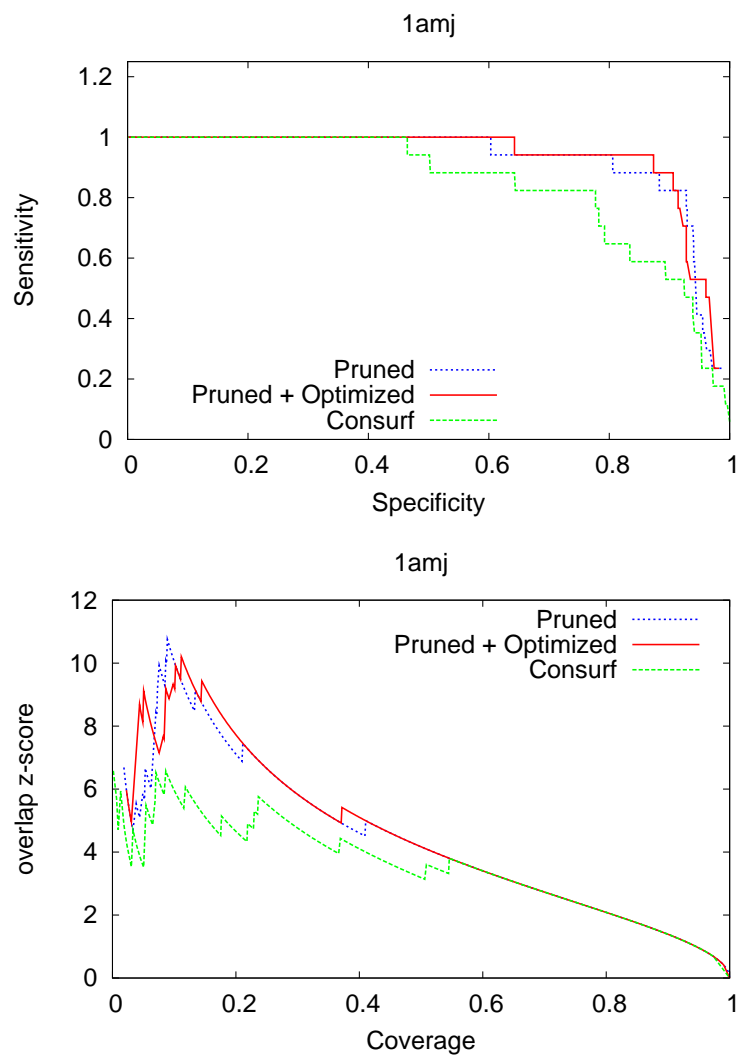

Figure 80: a) The sensitivity and specificity is shown for the pruned, pruned + optimized and the comparison method Consurf for PDBID 1amj. b) The overlap z-scores as a function of rank coverage for the three methods is shown.

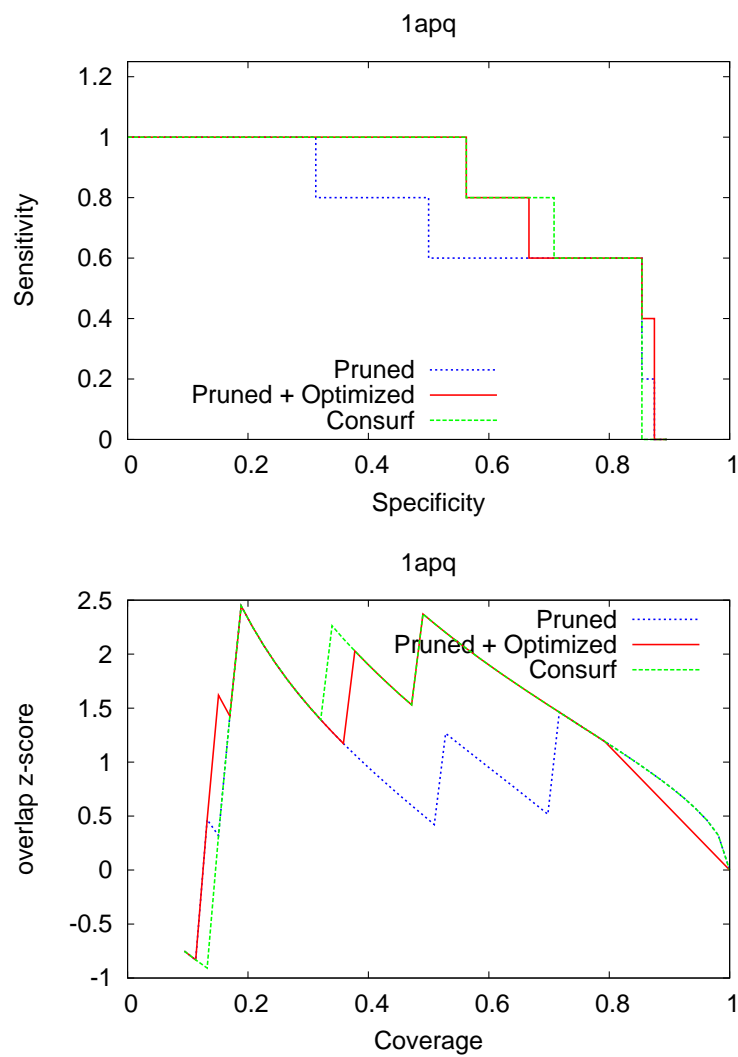

Figure 81: a) The sensitivity and specificity is shown for the pruned, pruned + optimized and the comparison method Consurf for PDBID 1apq. b) The overlap z-scores as a function of rank coverage for the three methods is shown.

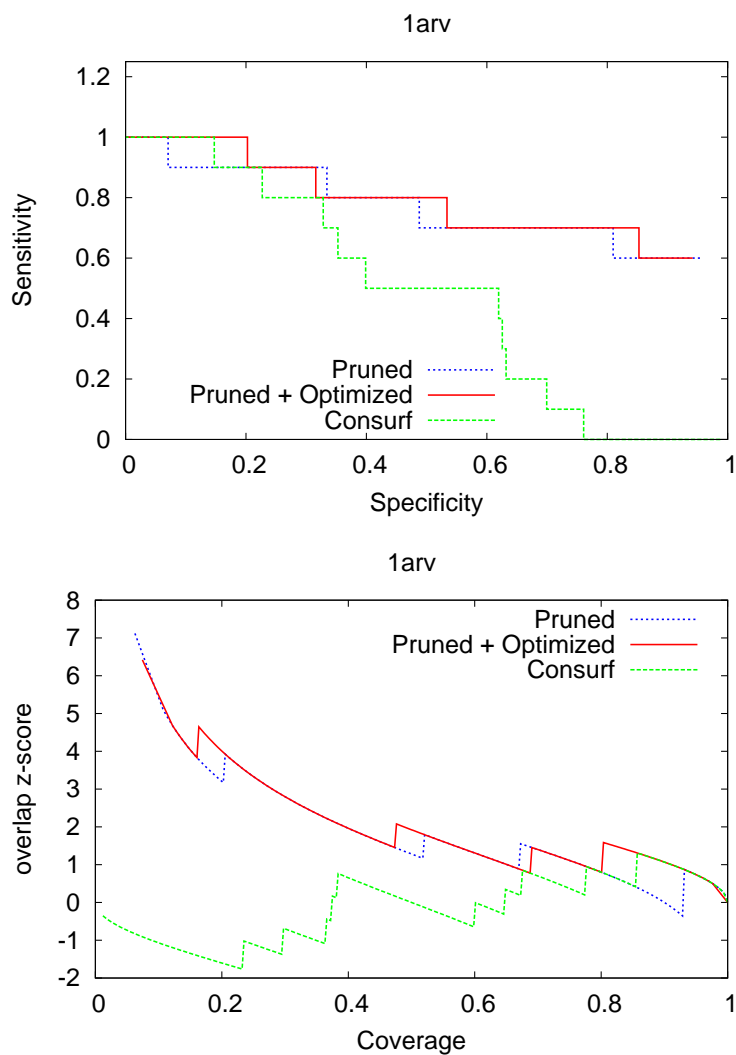

Figure 82: a) The sensitivity and specificity is shown for the pruned, pruned + optimized and the comparison method Consurf for PDBID 1arv. b) The overlap z-scores as a function of rank coverage for the three methods is shown.

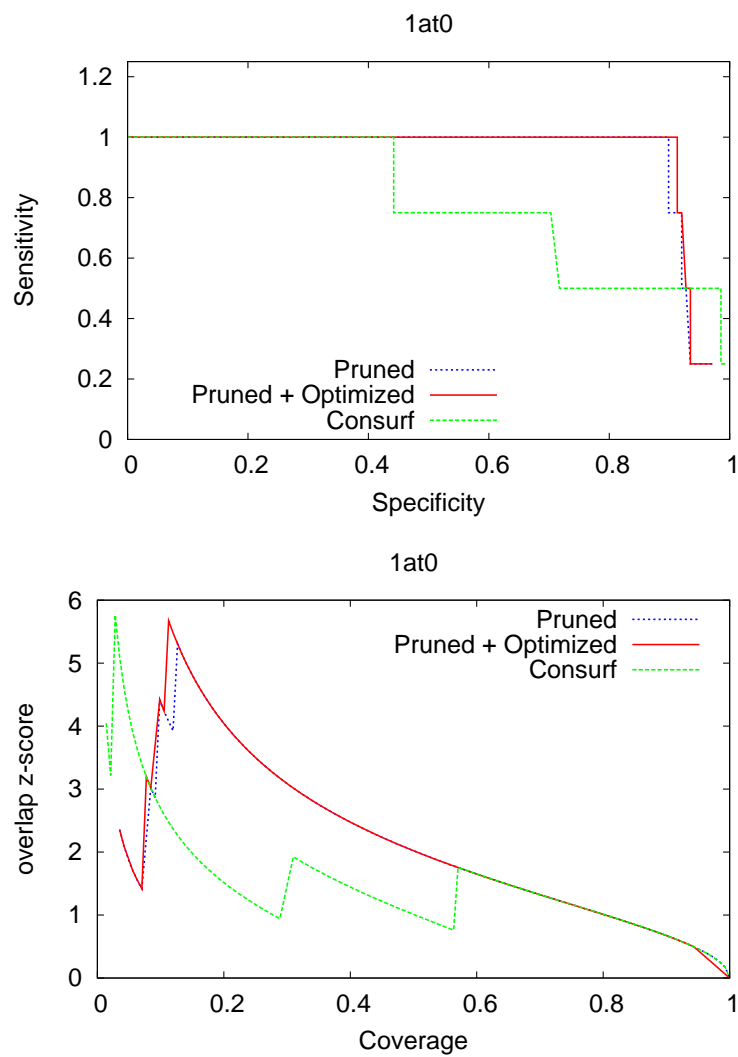

Figure 83: a) The sensitivity and specificity is shown for the pruned, pruned + optimized and the comparison method Consurf for PDBID 1at0. b) The overlap z-scores as a function of rank coverage for the three methods is shown.

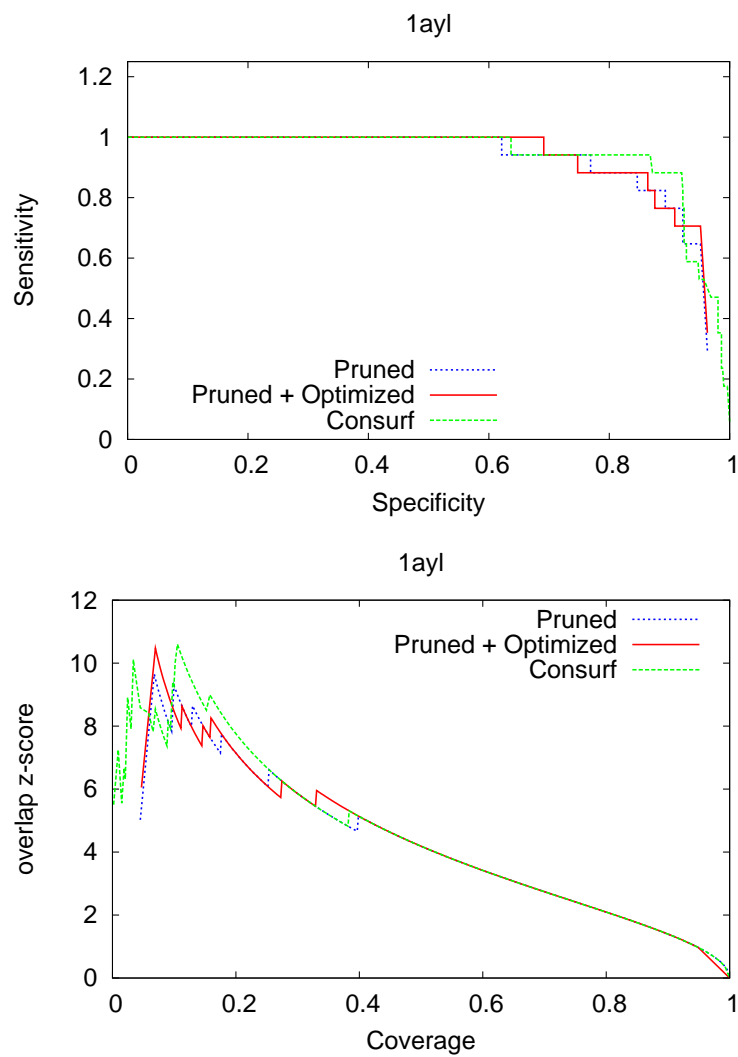

Figure 84: a) The sensitivity and specificity is shown for the pruned, pruned + optimized and the comparison method Consurf for PDBID 1ayl. b) The overlap z-scores as a function of rank coverage for the three methods is shown.

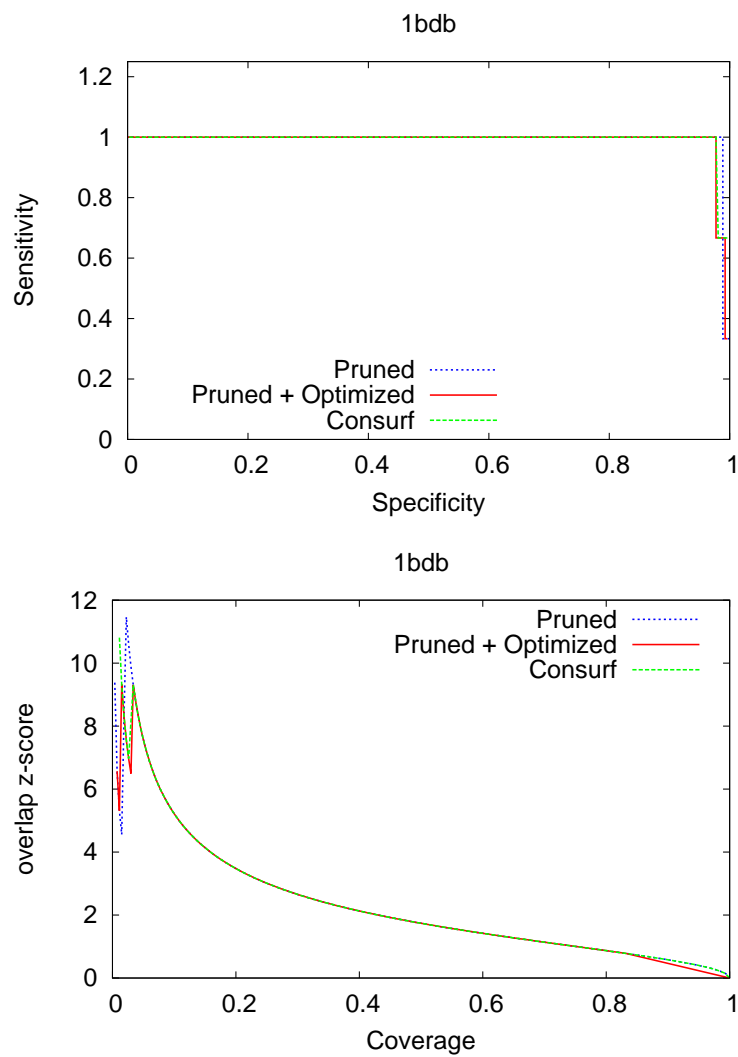

Figure 85: a) The sensitivity and specificity is shown for the pruned, pruned + optimized and the comparison method Consurf for PDBID 1bdb. b) The overlap z-scores as a function of rank coverage for the three methods is shown.



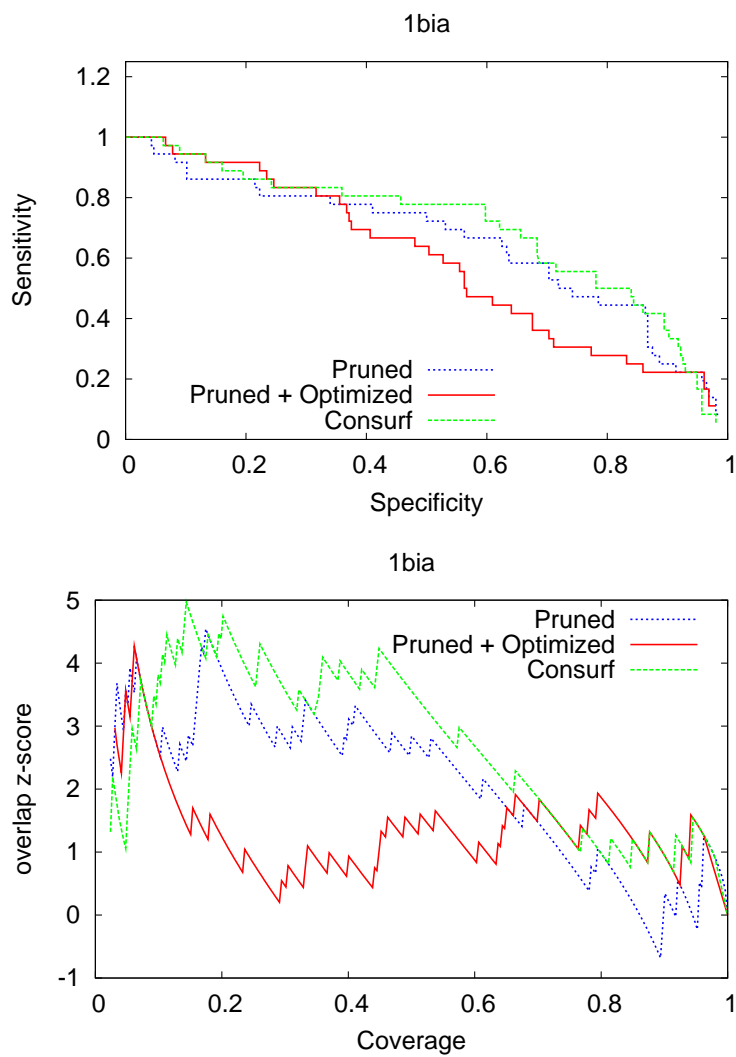

Figure 86: a) The sensitivity and specificity is shown for the pruned, pruned + optimized and the comparison method Consurf for PDBID 1bia. b) The overlap z-scores as a function of rank coverage for the three methods is shown.

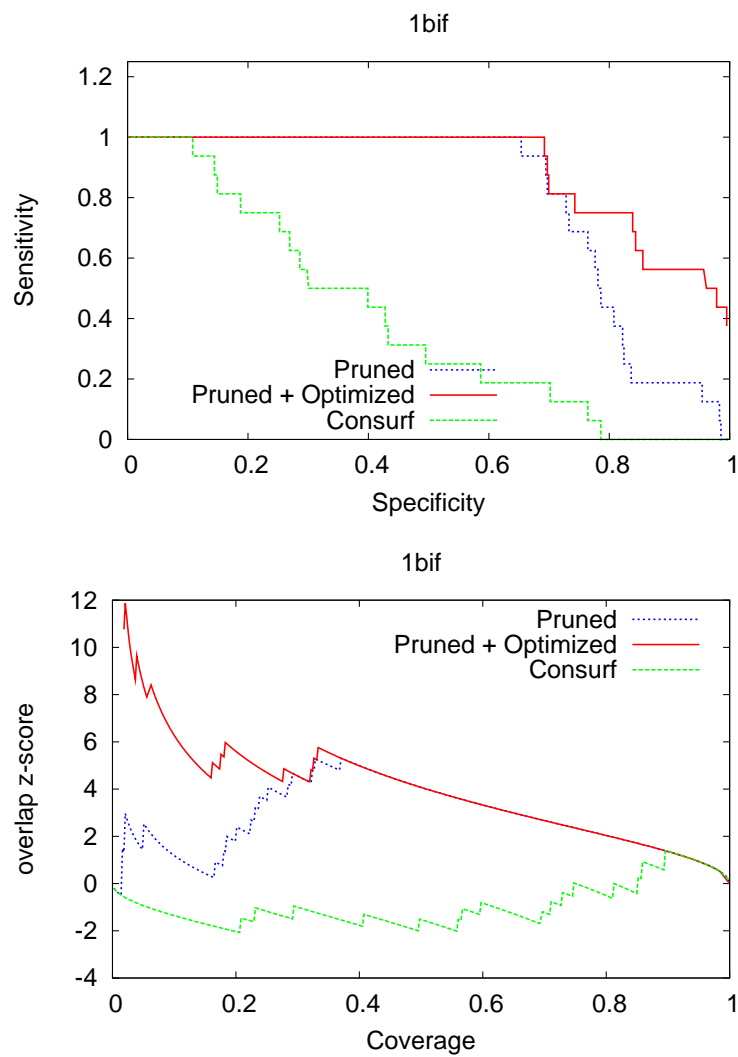

Figure 87: a) The sensitivity and specificity is shown for the pruned, pruned + optimized and the comparison method Consurf for PDBID 1bif. b) The overlap z-scores as a function of rank coverage for the three methods is shown.

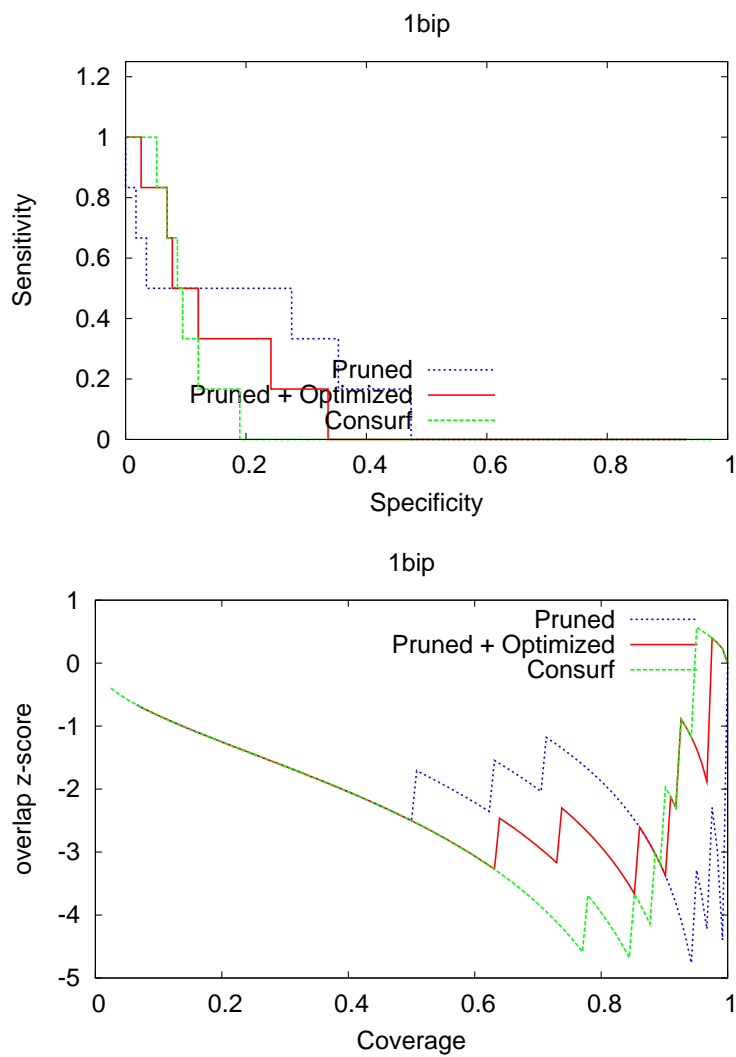

Figure 88: a) The sensitivity and specificity is shown for the pruned, pruned + optimized and the comparison method Consurf for PDBID 1bip. b) The overlap z-scores as a function of rank coverage for the three methods is shown.

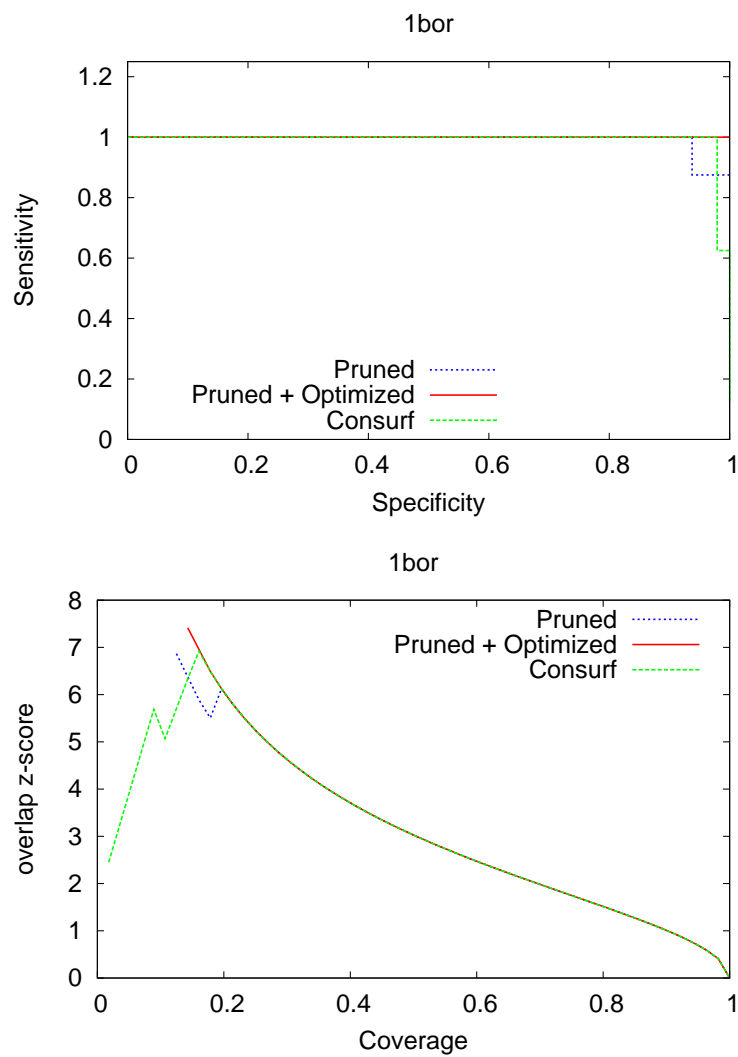

Figure 89: a) The sensitivity and specificity is shown for the pruned, pruned + optimized and the comparison method Consurf for PDBID 1bor. b) The overlap z-scores as a function of rank coverage for the three methods is shown.

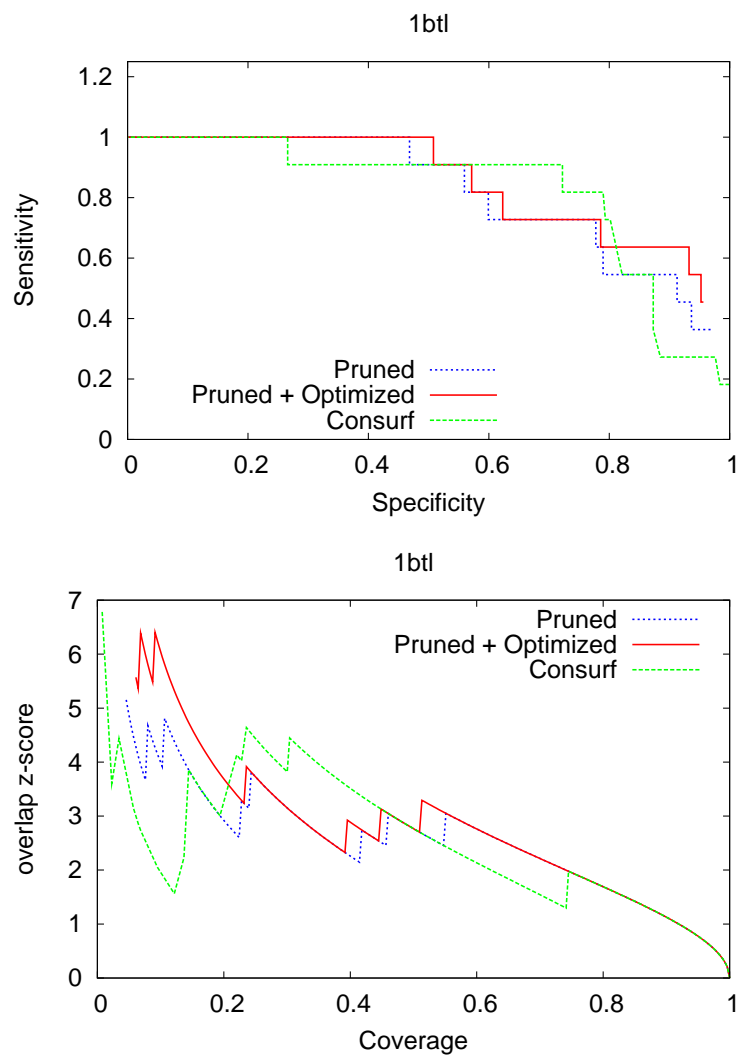

Figure 90: a) The sensitivity and specificity is shown for the pruned, pruned + optimized and the comparison method Consurf for PDBID 1btl. b) The overlap z-scores as a function of rank coverage for the three methods is shown.

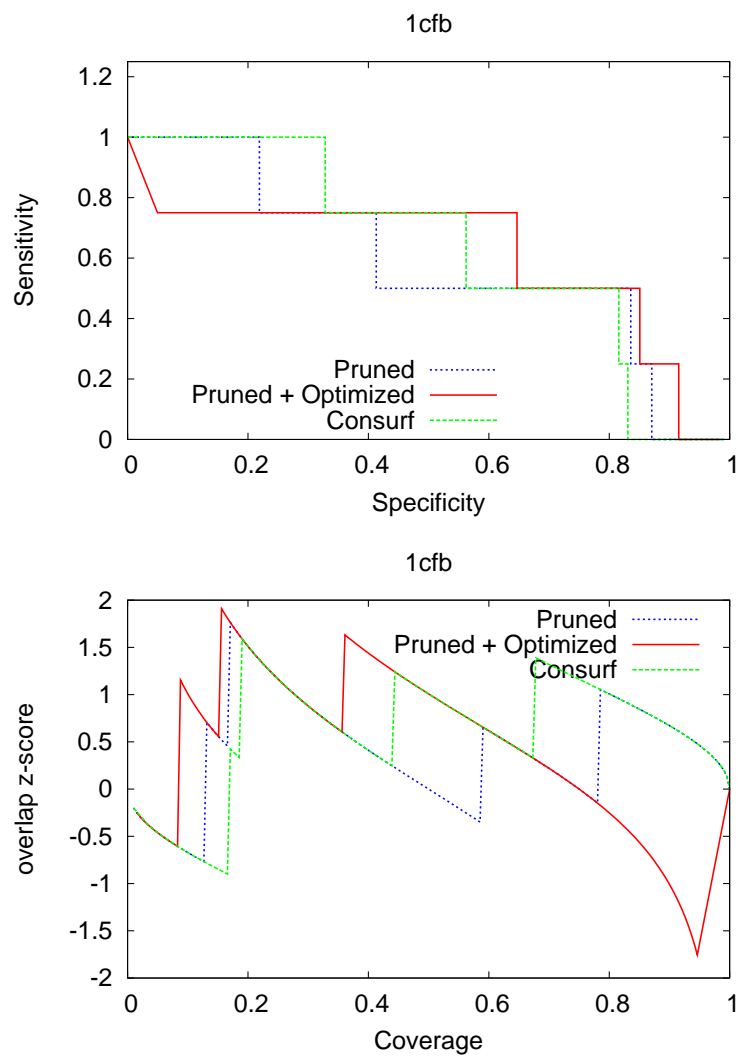

Figure 91: a) The sensitivity and specificity is shown for the pruned, pruned + optimized and the comparison method Consurf for PDBID 1cfb. b) The overlap z-scores as a function of rank coverage for the three methods is shown.

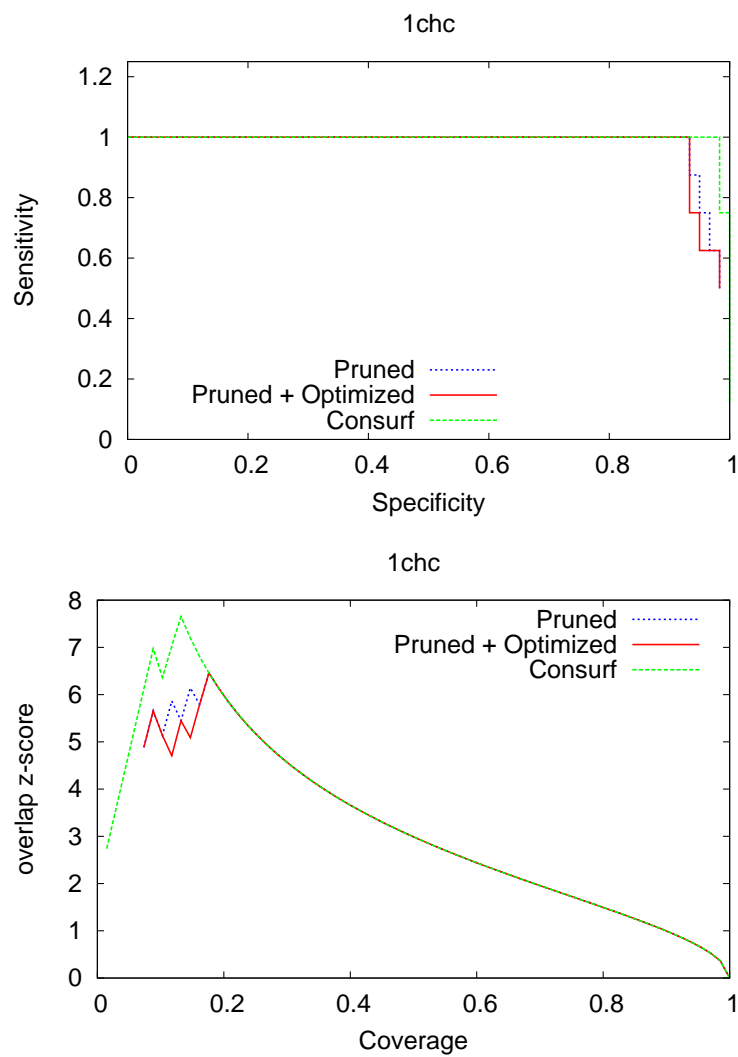

Figure 92: a) The sensitivity and specificity is shown for the pruned, pruned + optimized and the comparison method Consurf for PDBID 1chc. b) The overlap z-scores as a function of rank coverage for the three methods is shown.

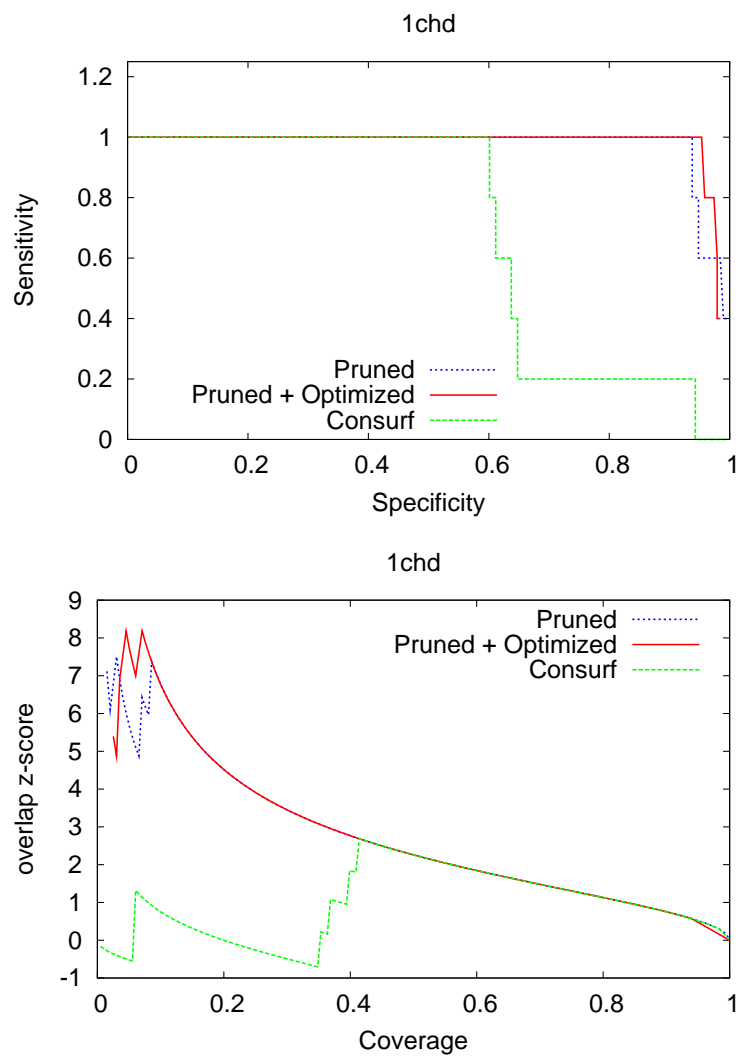

Figure 93: a) The sensitivity and specificity is shown for the pruned, pruned + optimized and the comparison method Consurf for PDBID 1chd. b) The overlap z-scores as a function of rank coverage for the three methods is shown.



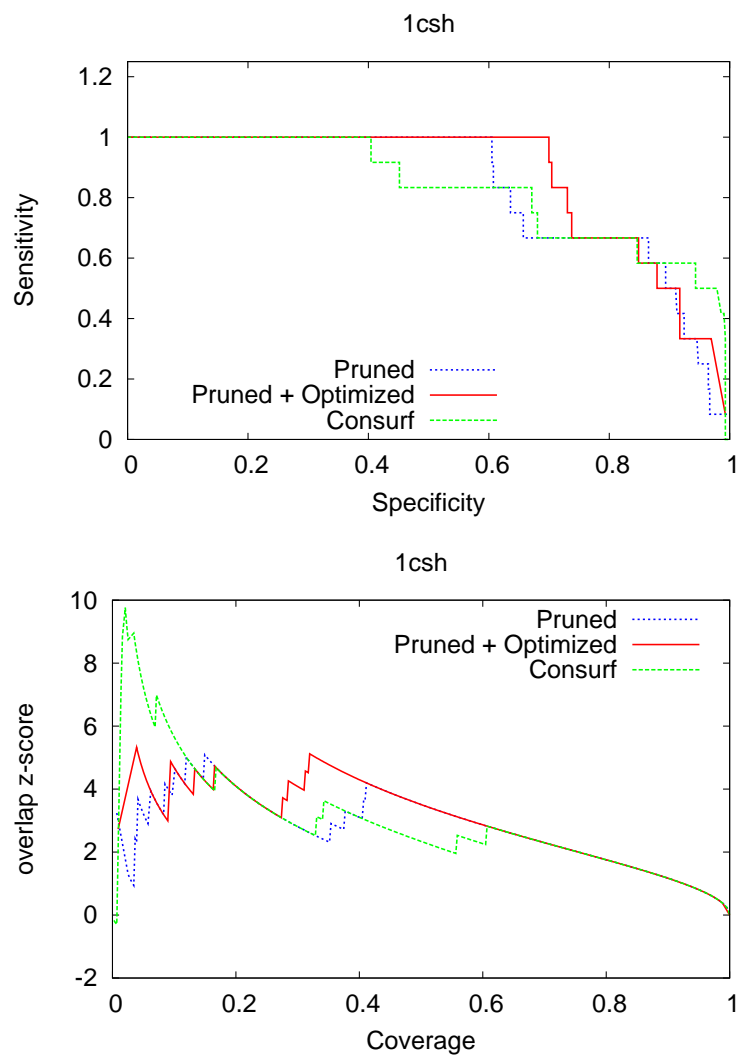

Figure 94: a) The sensitivity and specificity is shown for the pruned, pruned + optimized and the comparison method Consurf for PDBID 1csh. b) The overlap z-scores as a function of rank coverage for the three methods is shown.

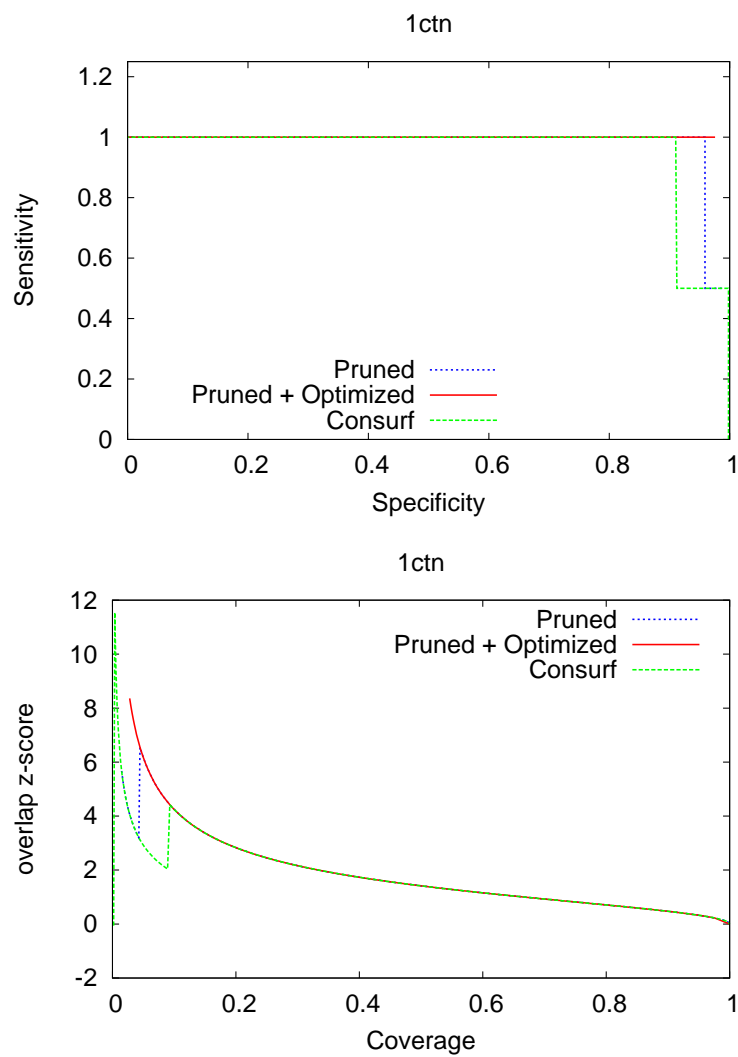

Figure 95: a) The sensitivity and specificity is shown for the pruned, pruned + optimized and the comparison method Consurf for PDBID 1ctn. b) The overlap z-scores as a function of rank coverage for the three methods is shown.

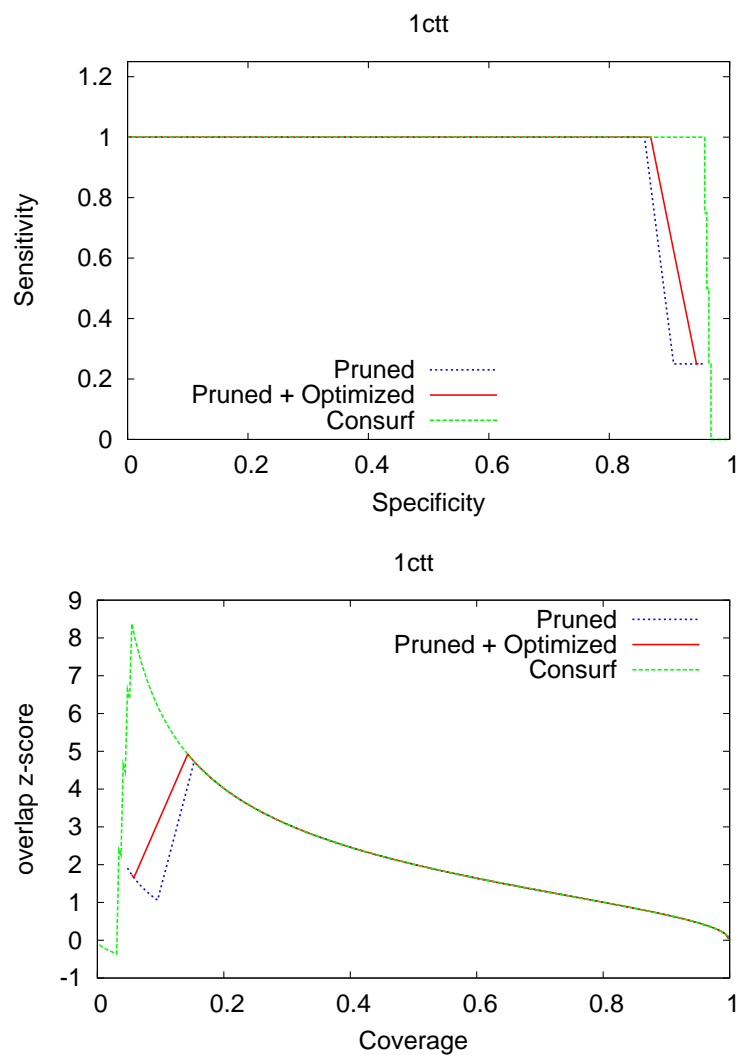

Figure 96: a) The sensitivity and specificity is shown for the pruned, pruned + optimized and the comparison method Consurf for PDBID 1ctt. b) The overlap z-scores as a function of rank coverage for the three methods is shown.

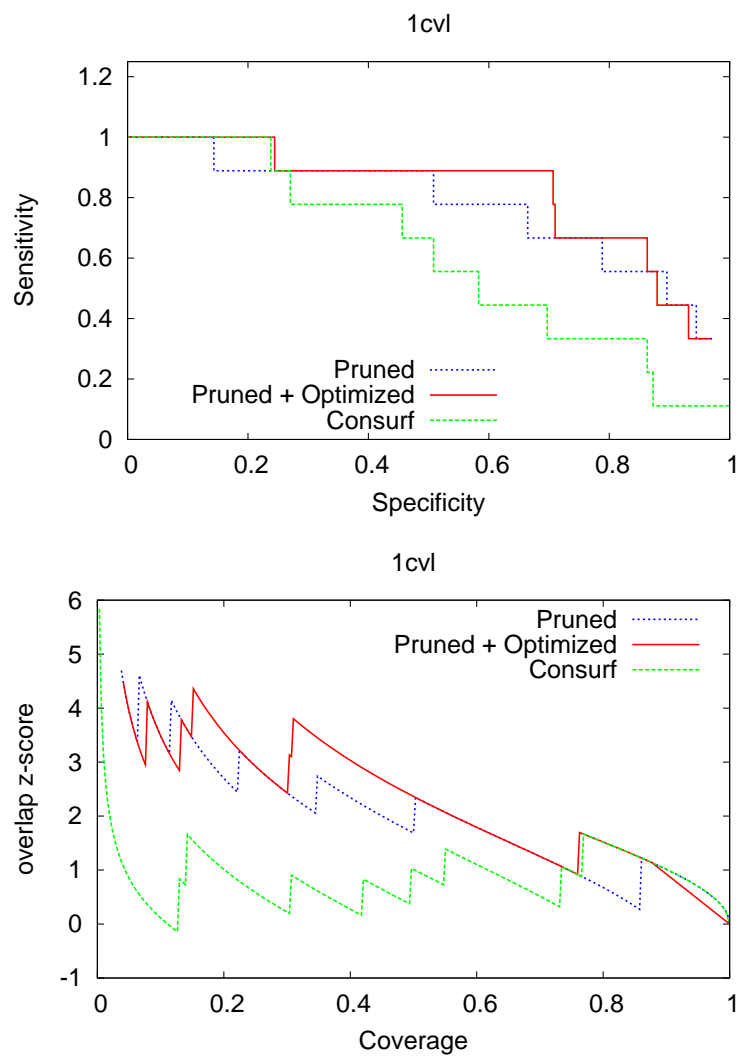

Figure 97: a) The sensitivity and specificity is shown for the pruned, pruned + optimized and the comparison method Consurf for PDBID 1cvl. b) The overlap z-scores as a function of rank coverage for the three methods is shown.

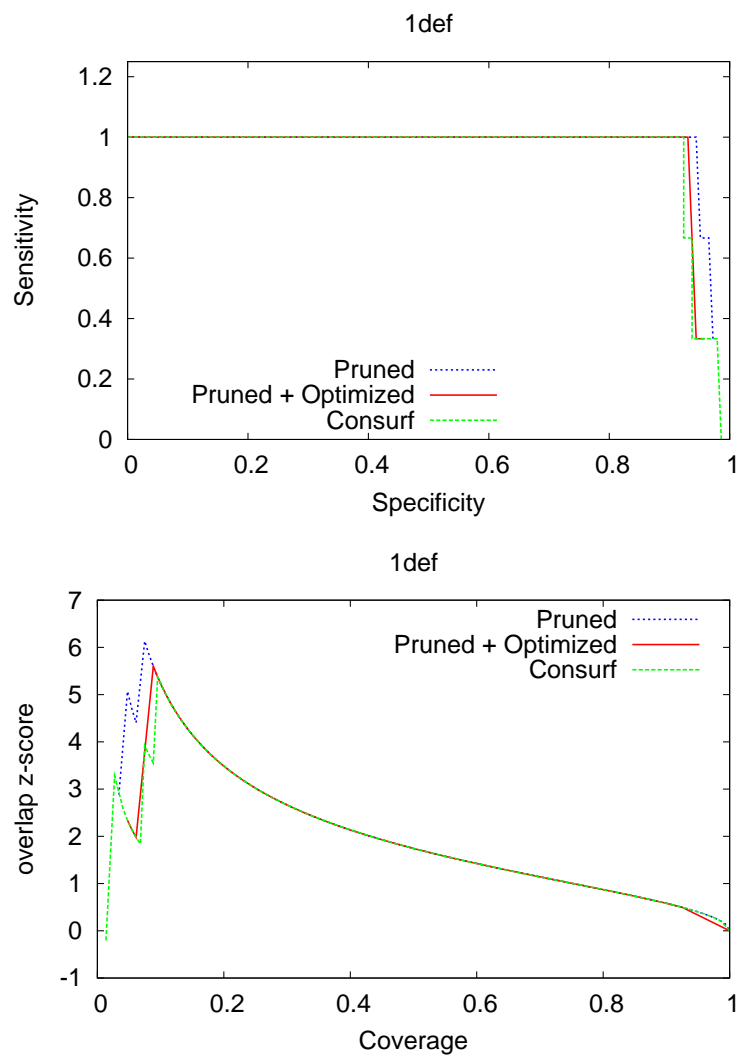

Figure 98: a) The sensitivity and specificity is shown for the pruned, pruned + optimized and the comparison method Consurf for PDBID 1def. b) The overlap z-scores as a function of rank coverage for the three methods is shown.

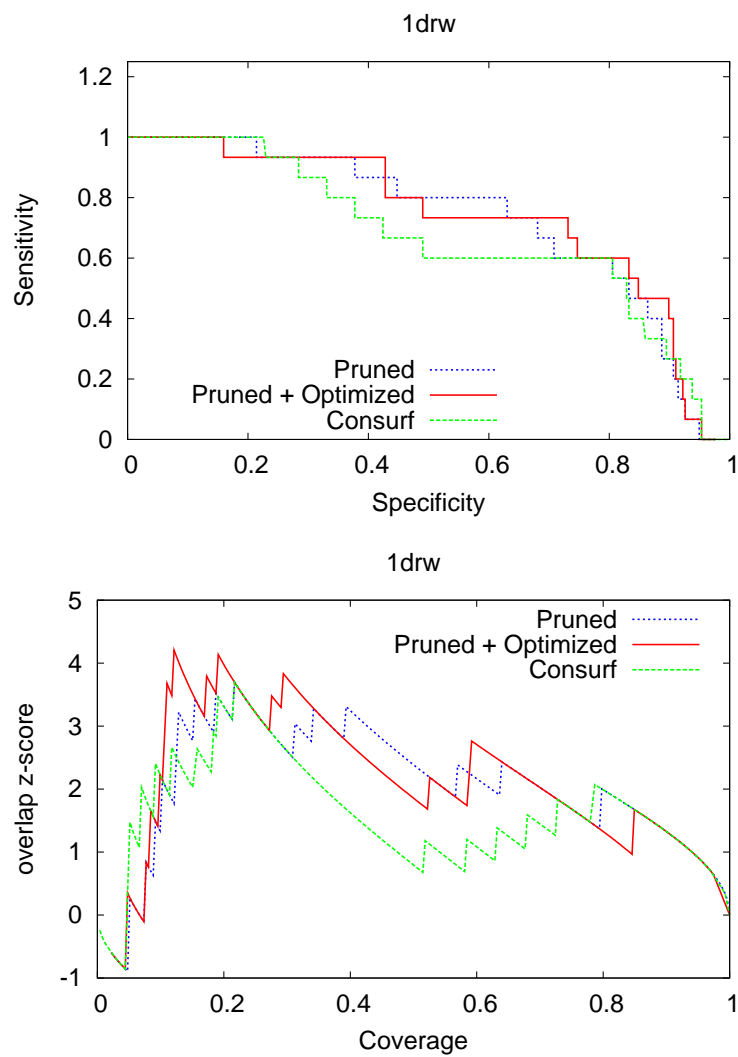

Figure 99: a) The sensitivity and specificity is shown for the pruned, pruned + optimized and the comparison method Consurf for PDBID 1drw. b) The overlap z-scores as a function of rank coverage for the three methods is shown.

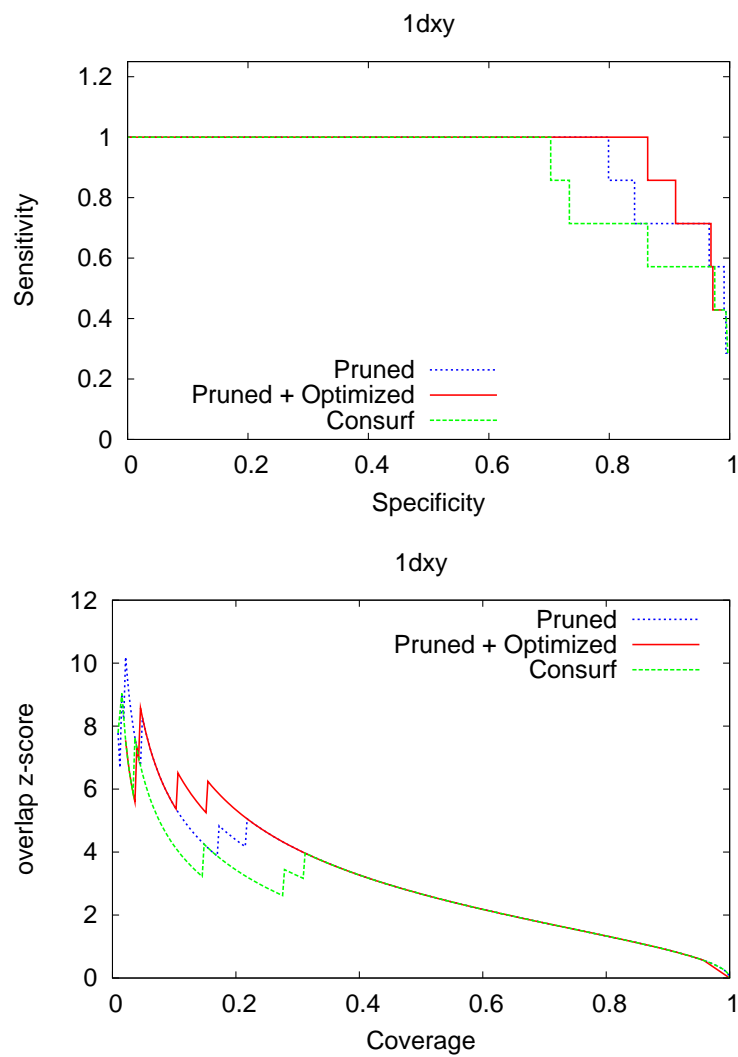

Figure 100: a) The sensitivity and specificity is shown for the pruned, pruned + optimized and the comparison method Consurf for PDBID 1dxy. b) The overlap z-scores as a function of rank coverage for the three methods is shown.

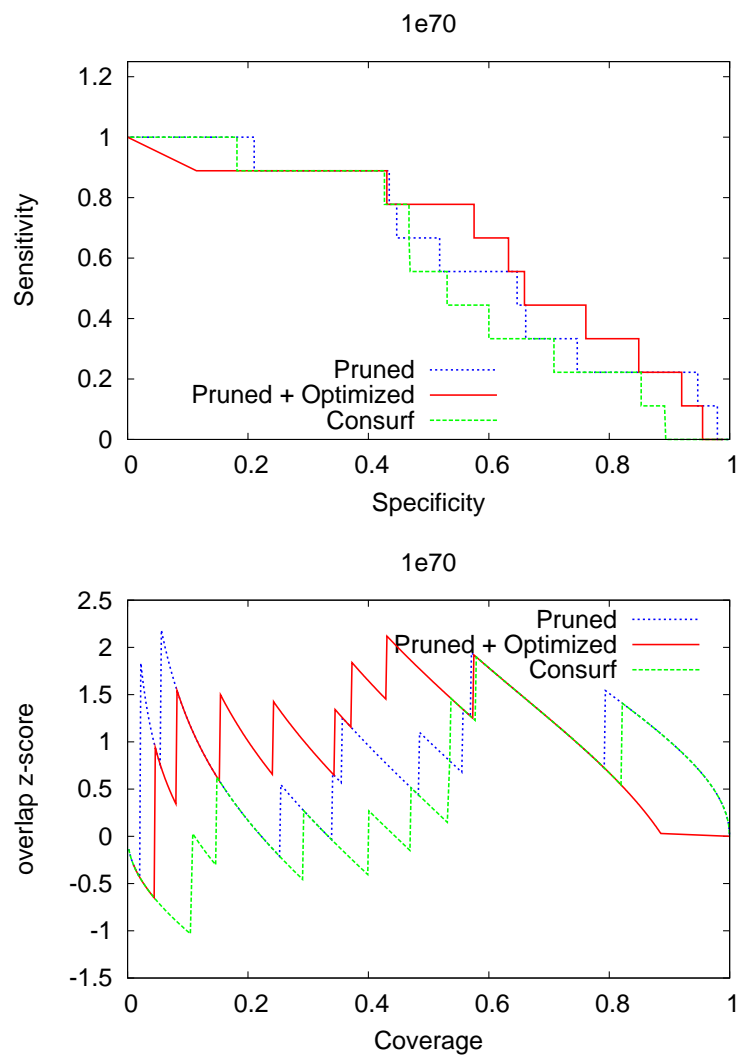

Figure 101: a) The sensitivity and specificity is shown for the pruned, pruned + optimized and the comparison method Consurf for PDBID 1e70. b) The overlap z-scores as a function of rank coverage for the three methods is shown.



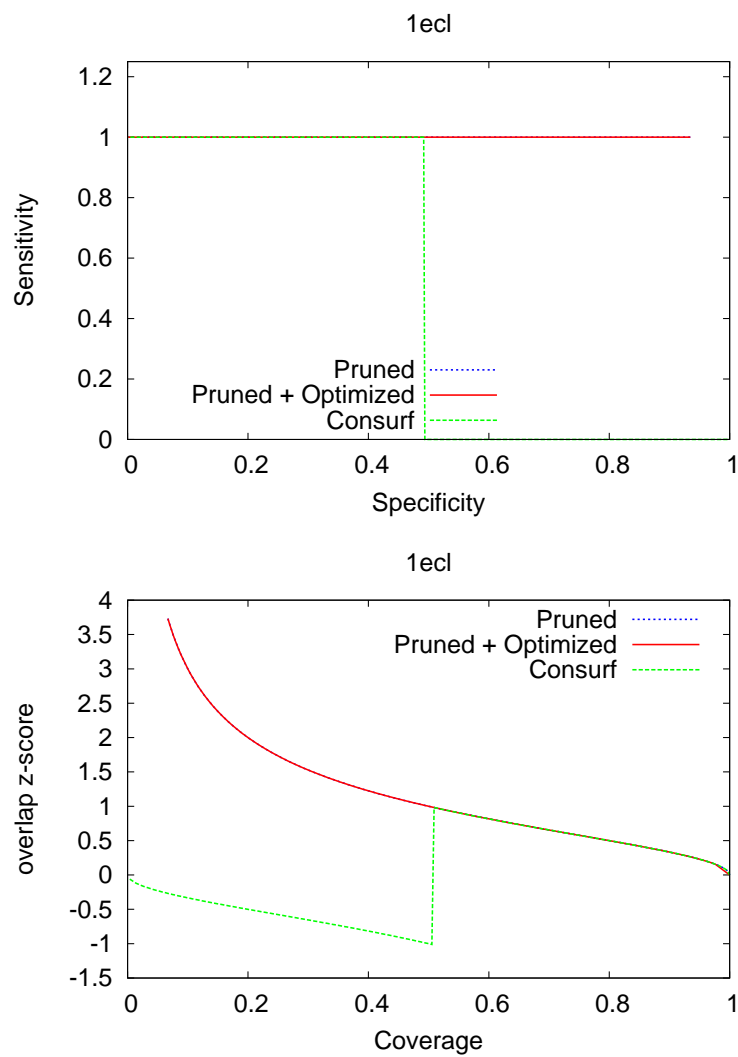

Figure 102: a) The sensitivity and specificity is shown for the pruned, pruned + optimized and the comparison method Consurf for PDBID 1ecl. b) The overlap z-scores as a function of rank coverage for the three methods is shown.

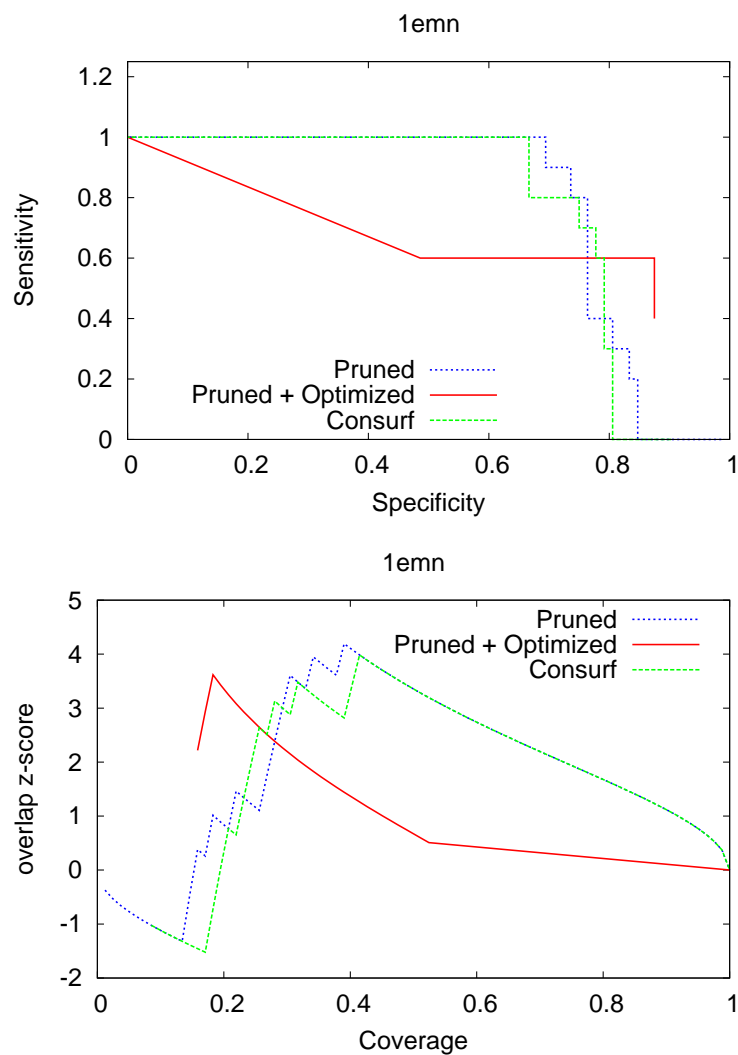

Figure 103: a) The sensitivity and specificity is shown for the pruned, pruned + optimized and the comparison method Consurf for PDBID 1emn. b) The overlap z-scores as a function of rank coverage for the three methods is shown.

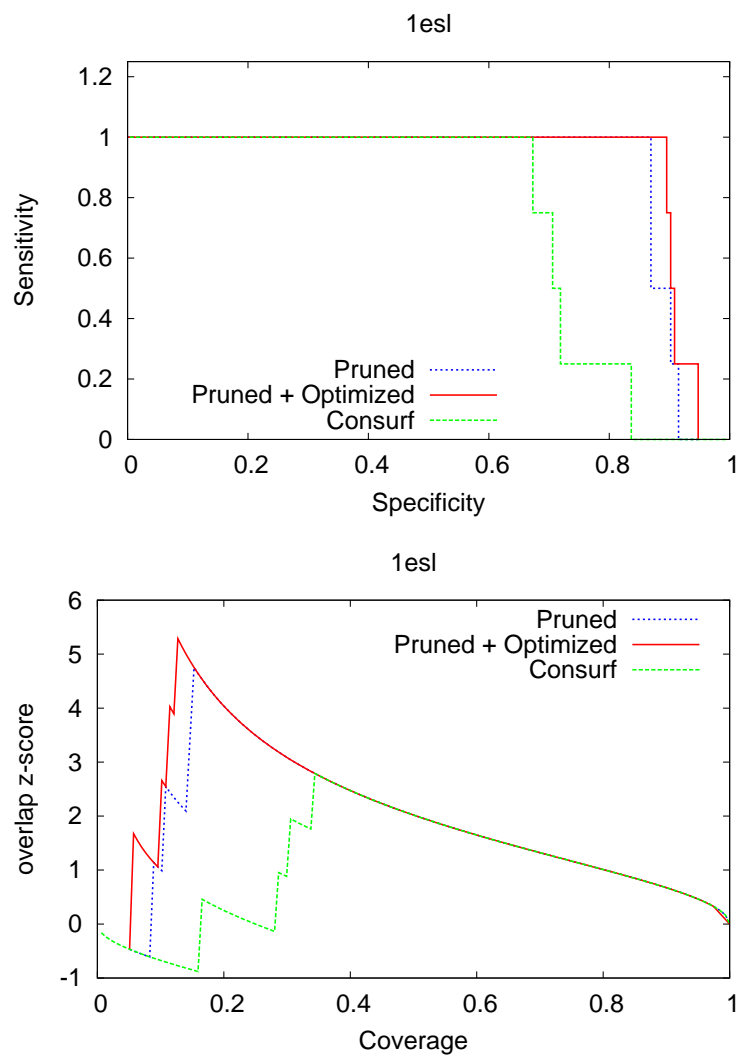

Figure 104: a) The sensitivity and specificity is shown for the pruned, pruned + optimized and the comparison method Consurf for PDBID 1esl. b) The overlap z-scores as a function of rank coverage for the three methods is shown.

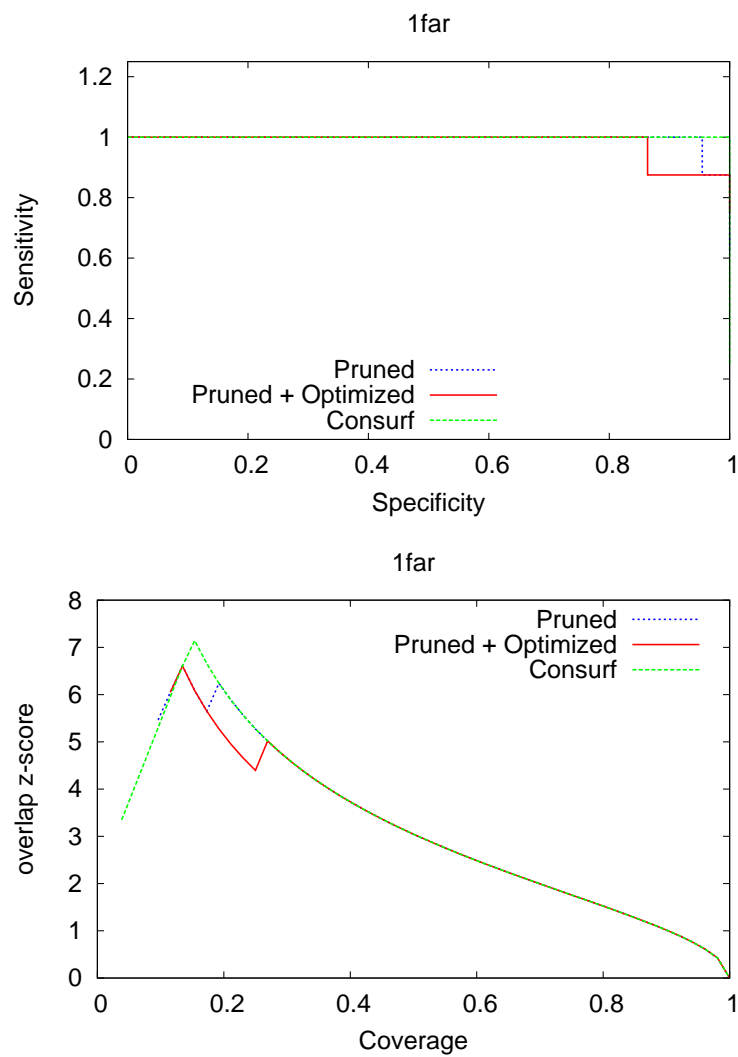

Figure 105: a) The sensitivity and specificity is shown for the pruned, pruned + optimized and the comparison method Consurf for PDBID 1far. b) The overlap z-scores as a function of rank coverage for the three methods is shown.

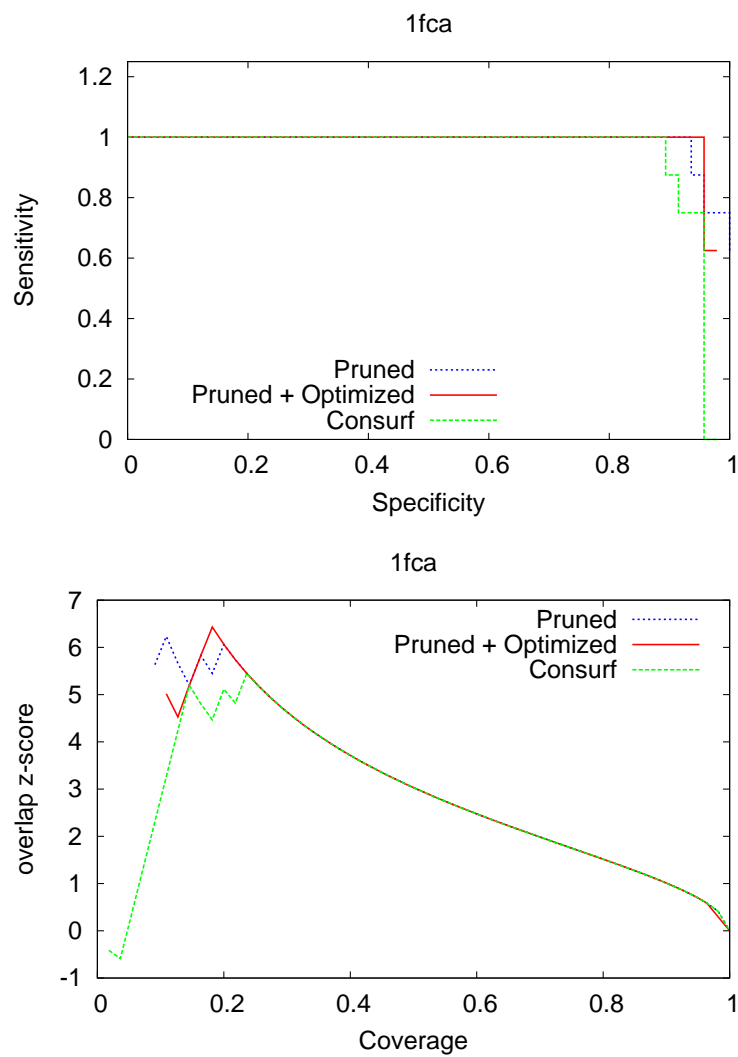

Figure 106: a) The sensitivity and specificity is shown for the pruned, pruned + optimized and the comparison method Consurf for PDBID 1fca. b) The overlap z-scores as a function of rank coverage for the three methods is shown.

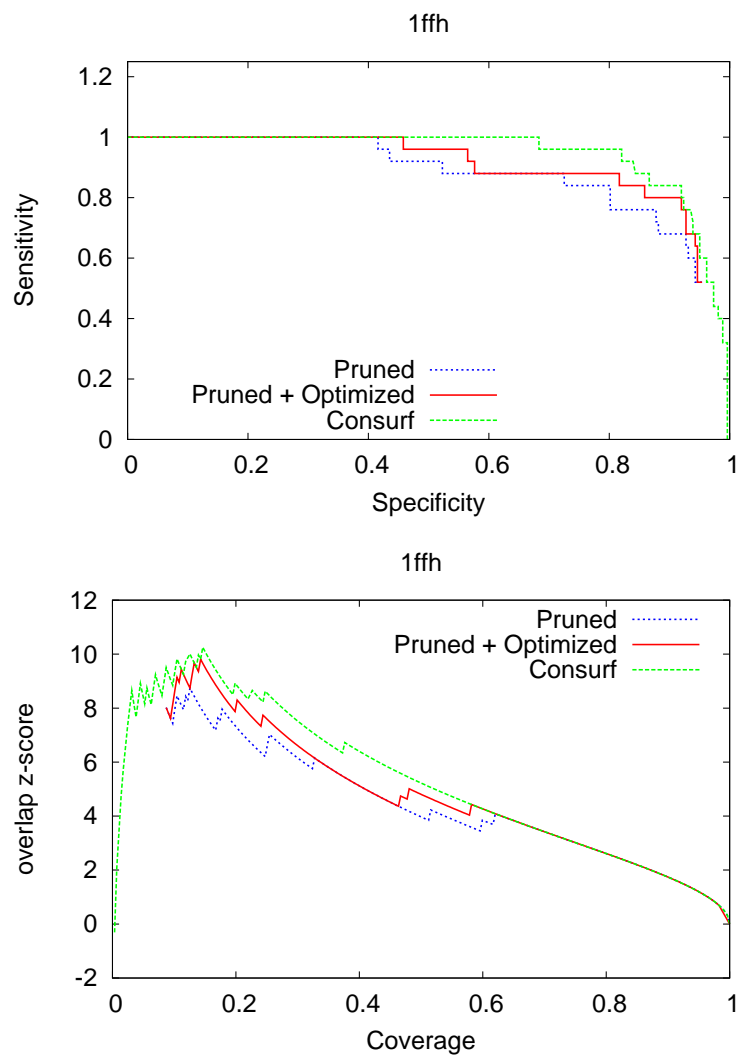

Figure 107: a) The sensitivity and specificity is shown for the pruned, pruned + optimized and the comparison method Consurf for PDBID 1ffh. b) The overlap z-scores as a function of rank coverage for the three methods is shown.

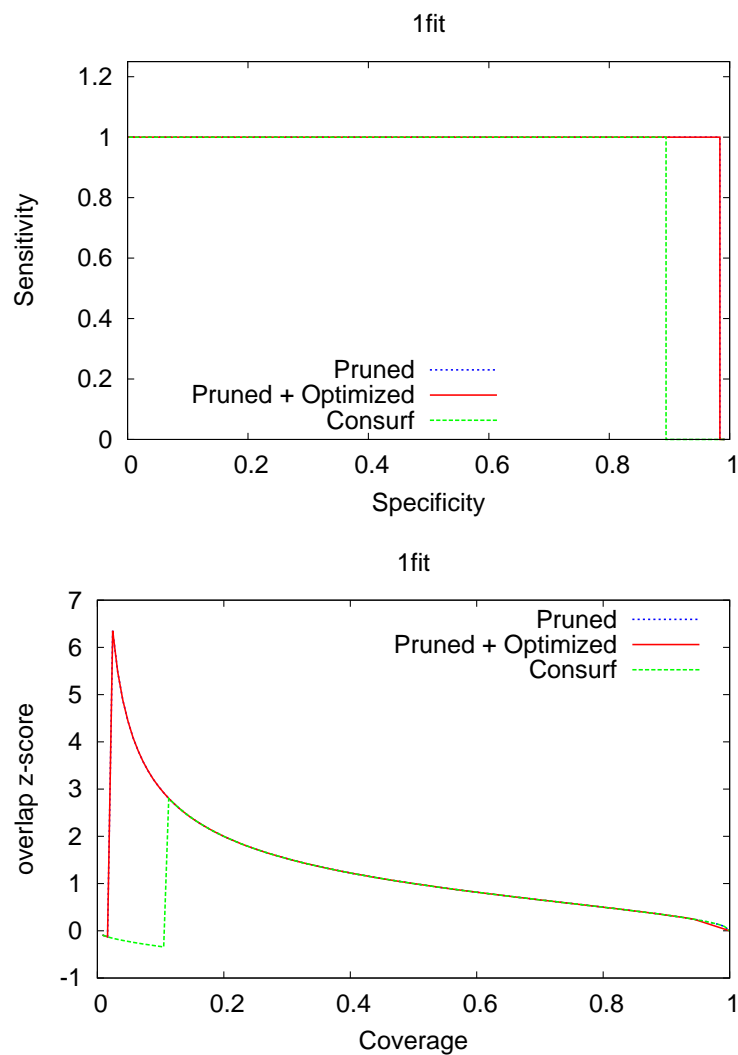

Figure 108: a) The sensitivity and specificity is shown for the pruned, pruned + optimized and the comparison method Consurf for PDBID 1fit. b) The overlap z-scores as a function of rank coverage for the three methods is shown.

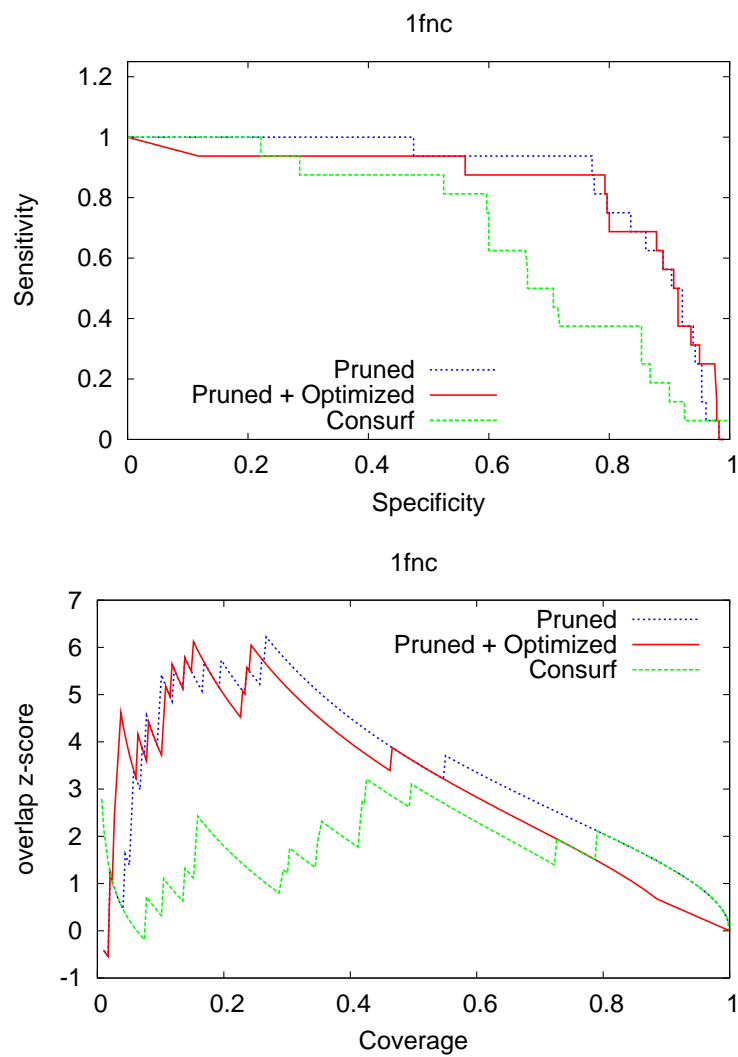

Figure 109: a) The sensitivity and specificity is shown for the pruned, pruned + optimized and the comparison method Consurf for PDBID 1fnc. b) The overlap z-scores as a function of rank coverage for the three methods is shown.



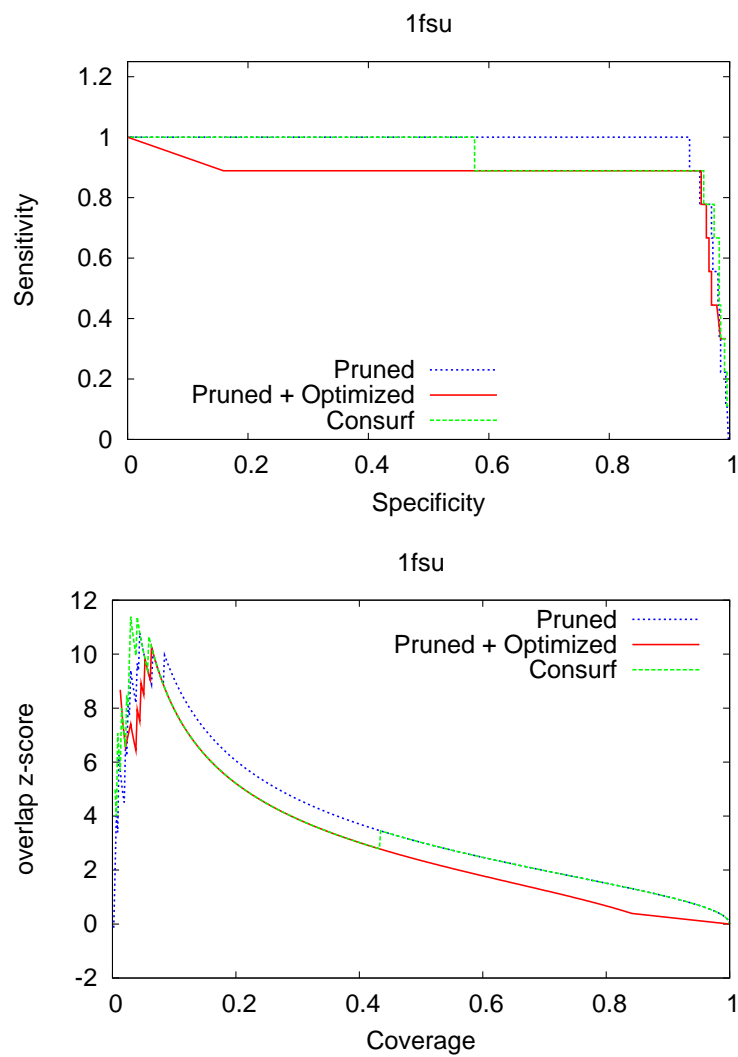

Figure 110: a) The sensitivity and specificity is shown for the pruned, pruned + optimized and the comparison method Consurf for PDBID 1fsu. b) The overlap z-scores as a function of rank coverage for the three methods is shown.

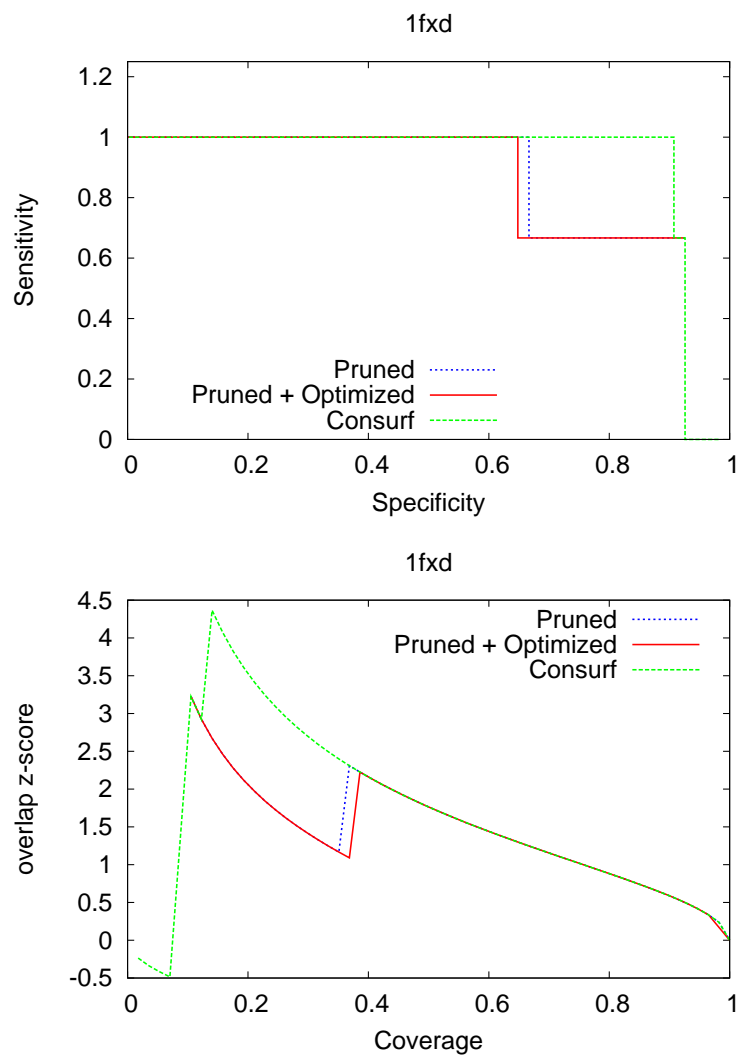

Figure 111: a) The sensitivity and specificity is shown for the pruned, pruned + optimized and the comparison method Consurf for PDBID 1fxd. b) The overlap z-scores as a function of rank coverage for the three methods is shown.

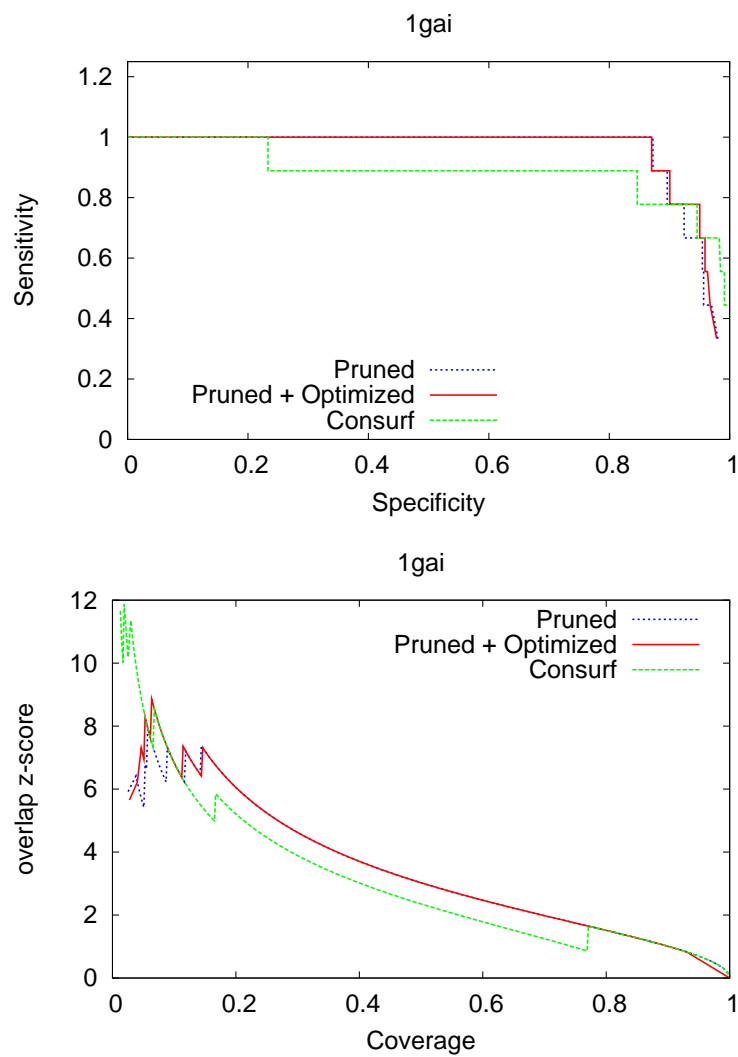

Figure 112: a) The sensitivity and specificity is shown for the pruned, pruned + optimized and the comparison method Consurf for PDBID 1gai. b) The overlap z-scores as a function of rank coverage for the three methods is shown.

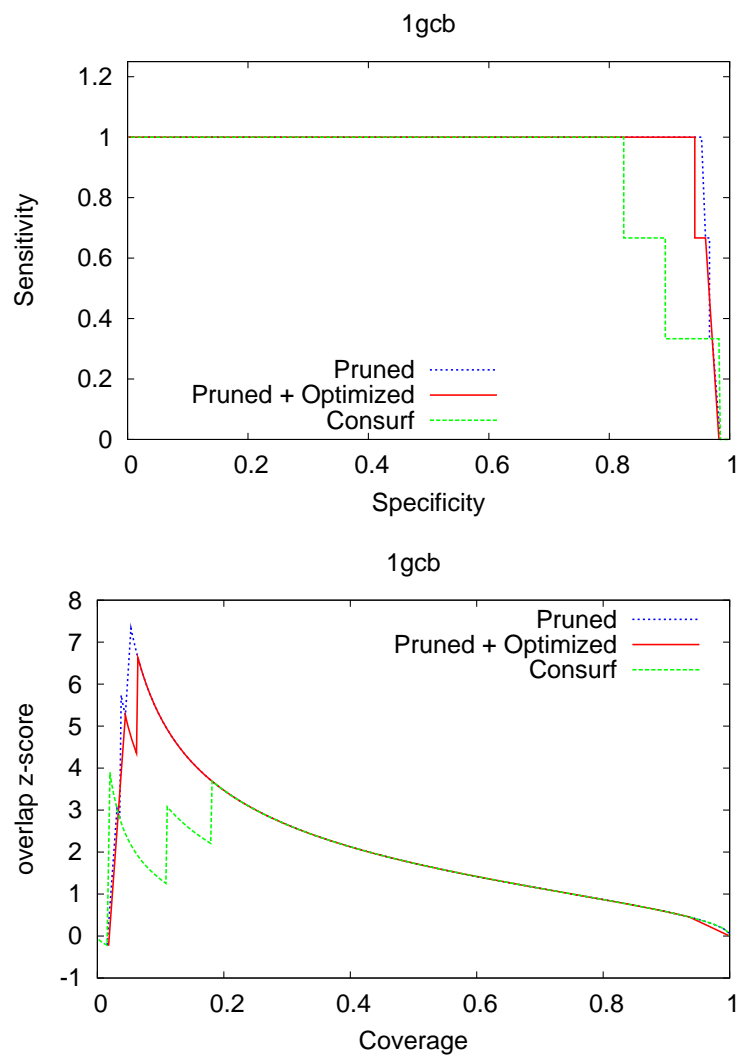

Figure 113: a) The sensitivity and specificity is shown for the pruned, pruned + optimized and the comparison method Consurf for PDBID 1gcb. b) The overlap z-scores as a function of rank coverage for the three methods is shown.

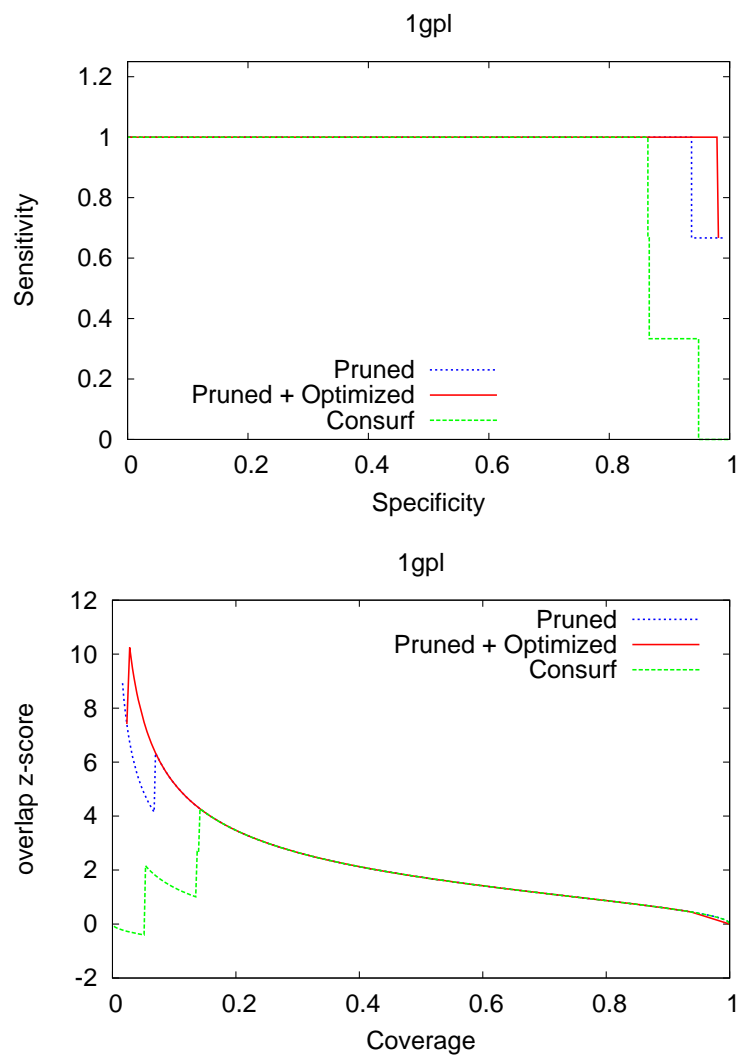

Figure 114: a) The sensitivity and specificity is shown for the pruned, pruned + optimized and the comparison method Consurf for PDBID 1gpl. b) The overlap z-scores as a function of rank coverage for the three methods is shown.

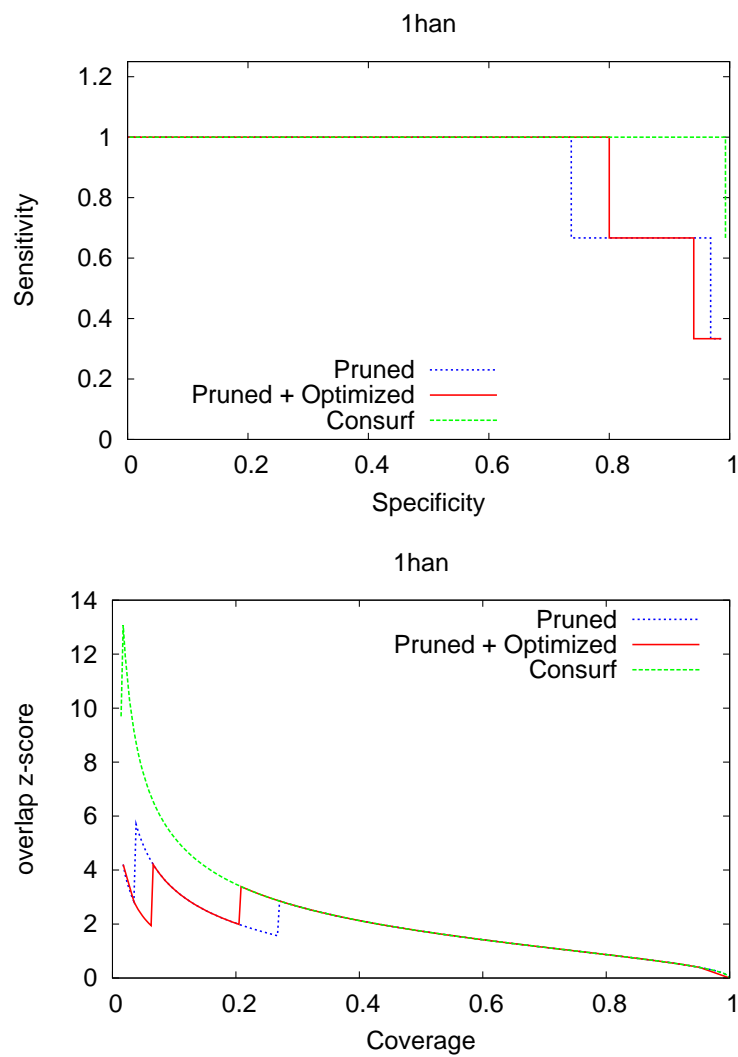

Figure 115: a) The sensitivity and specificity is shown for the pruned, pruned + optimized and the comparison method Consurf for PDBID 1han. b) The overlap z-scores as a function of rank coverage for the three methods is shown.

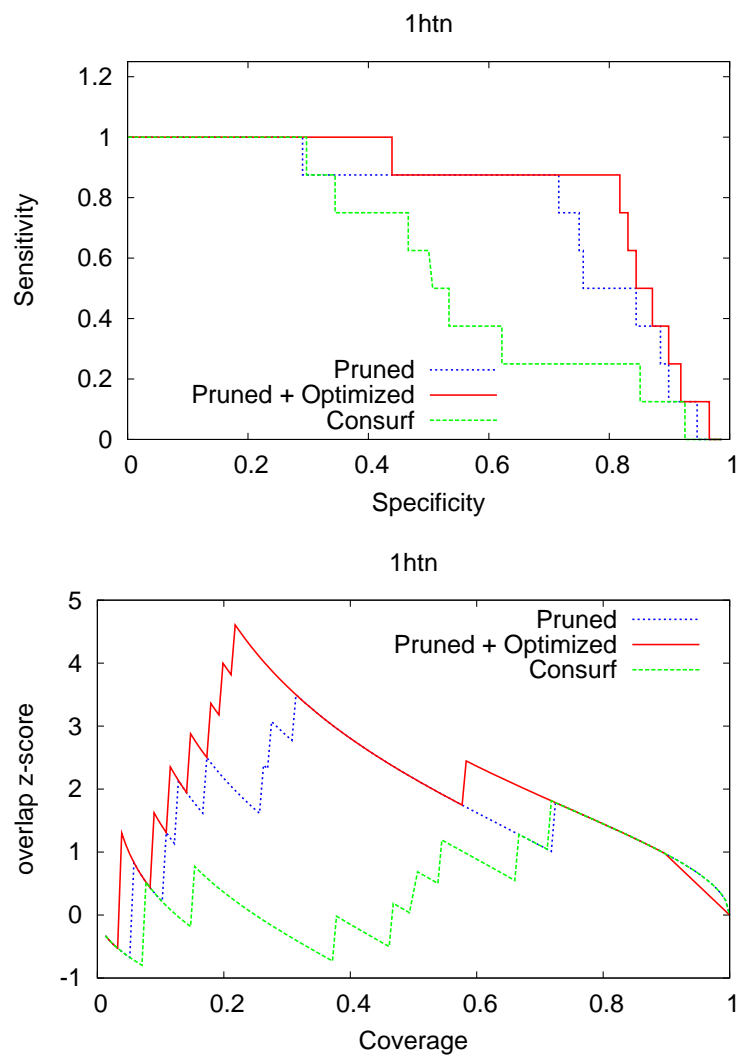

Figure 116: a) The sensitivity and specificity is shown for the pruned, pruned + optimized and the comparison method Consurf for PDBID 1htn. b) The overlap z-scores as a function of rank coverage for the three methods is shown.

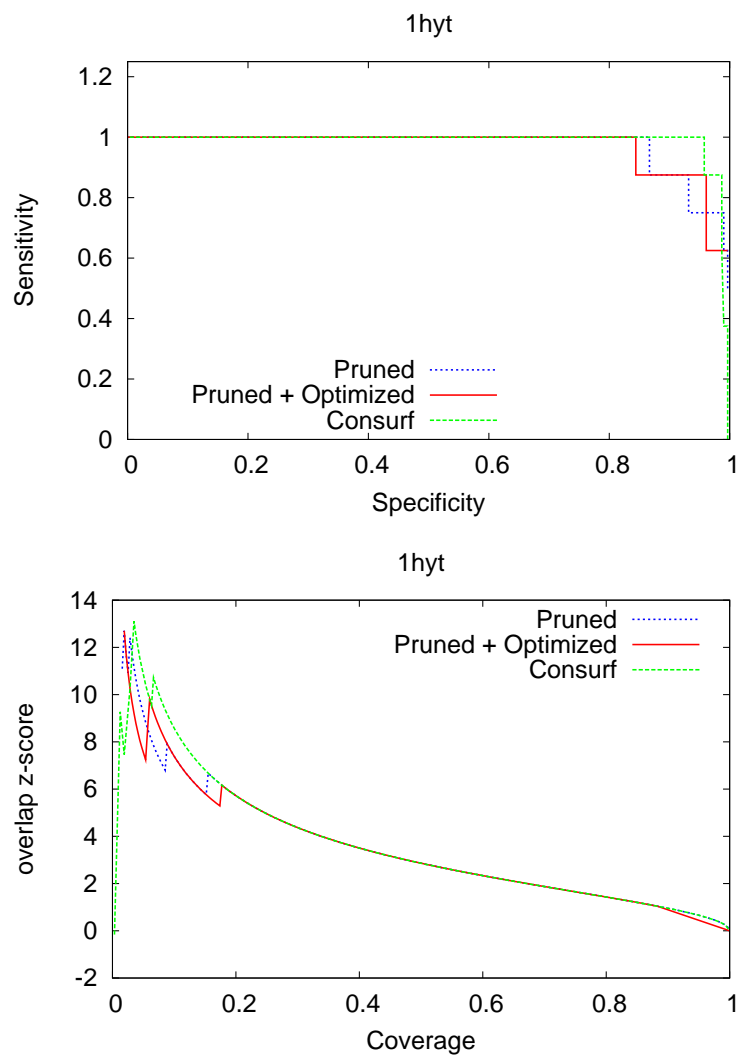

Figure 117: a) The sensitivity and specificity is shown for the pruned, pruned + optimized and the comparison method Consurf for PDBID 1hyt. b) The overlap z-scores as a function of rank coverage for the three methods is shown.



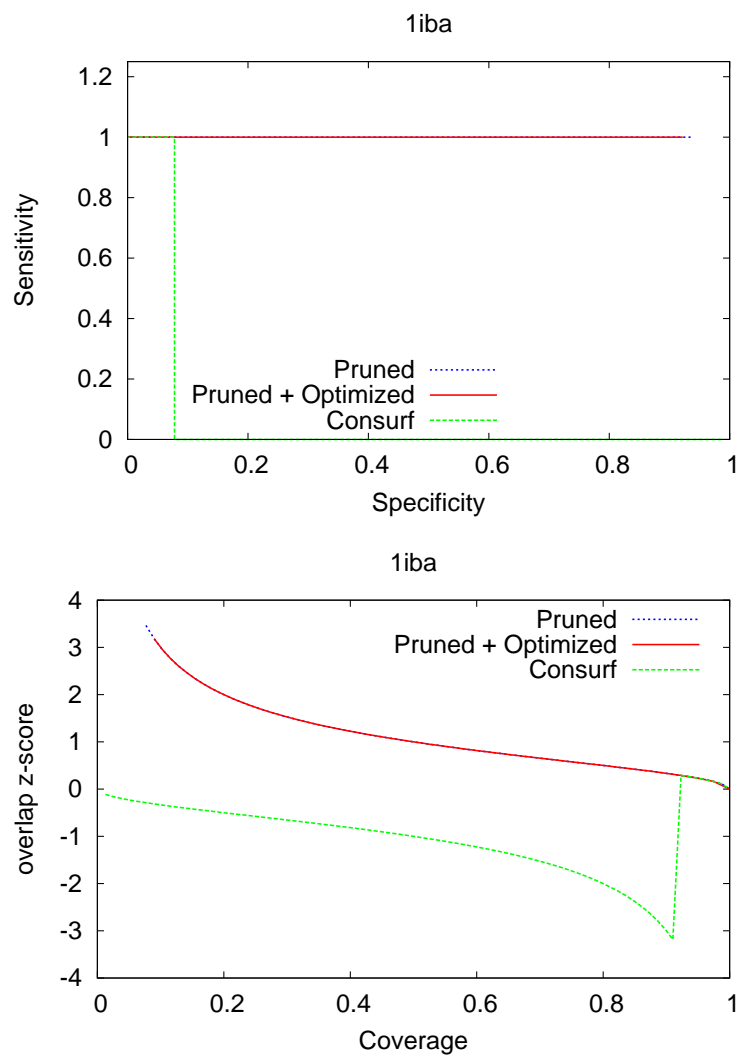

Figure 118: a) The sensitivity and specificity is shown for the pruned, pruned + optimized and the comparison method Consurf for PDBID 1iba. b) The overlap z-scores as a function of rank coverage for the three methods is shown.

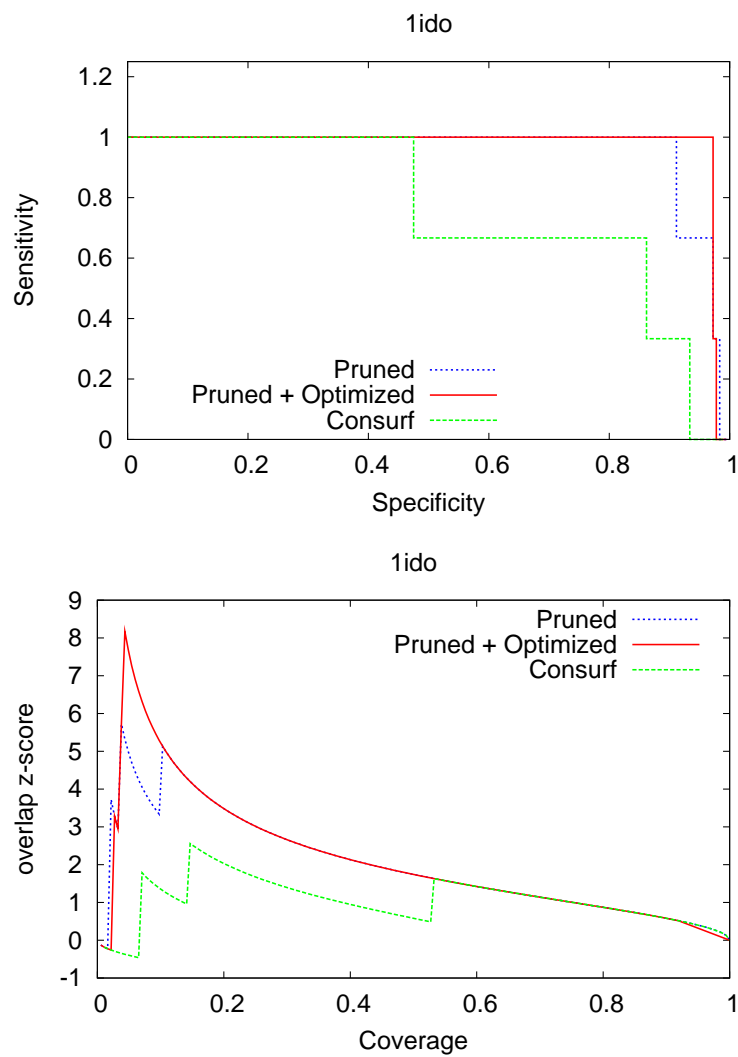

Figure 119: a) The sensitivity and specificity is shown for the pruned, pruned + optimized and the comparison method Consurf for PDBID 1ido. b) The overlap z-scores as a function of rank coverage for the three methods is shown.

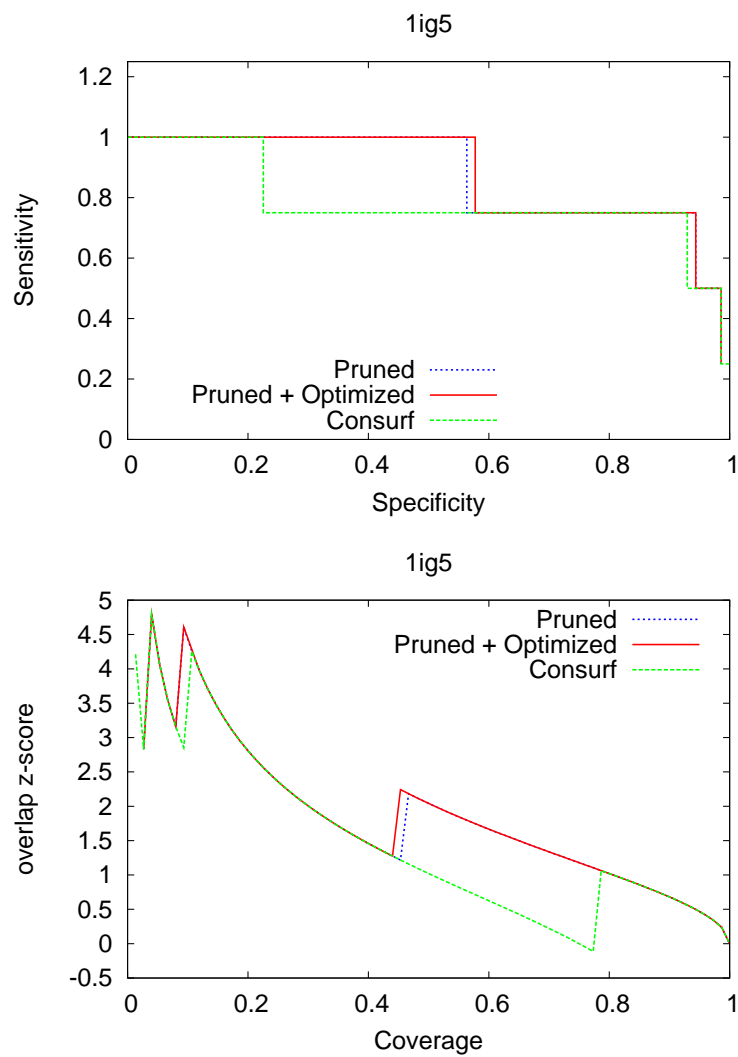

Figure 120: a) The sensitivity and specificity is shown for the pruned, pruned + optimized and the comparison method Consurf for PDBID 1ig5. b) The overlap z-scores as a function of rank coverage for the three methods is shown.

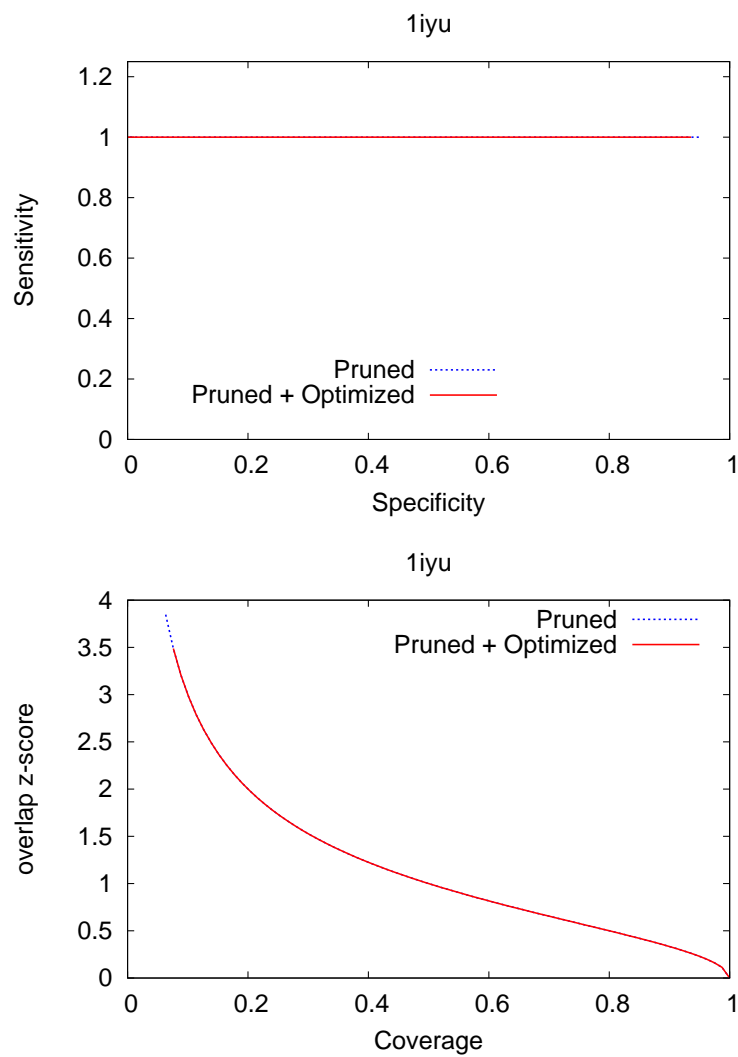

Figure 121: a) The sensitivity and specificity is shown for the pruned, pruned + optimized and the comparison method Consurf for PDBID 1iyu. b) The overlap z-scores as a function of rank coverage for the three methods is shown.

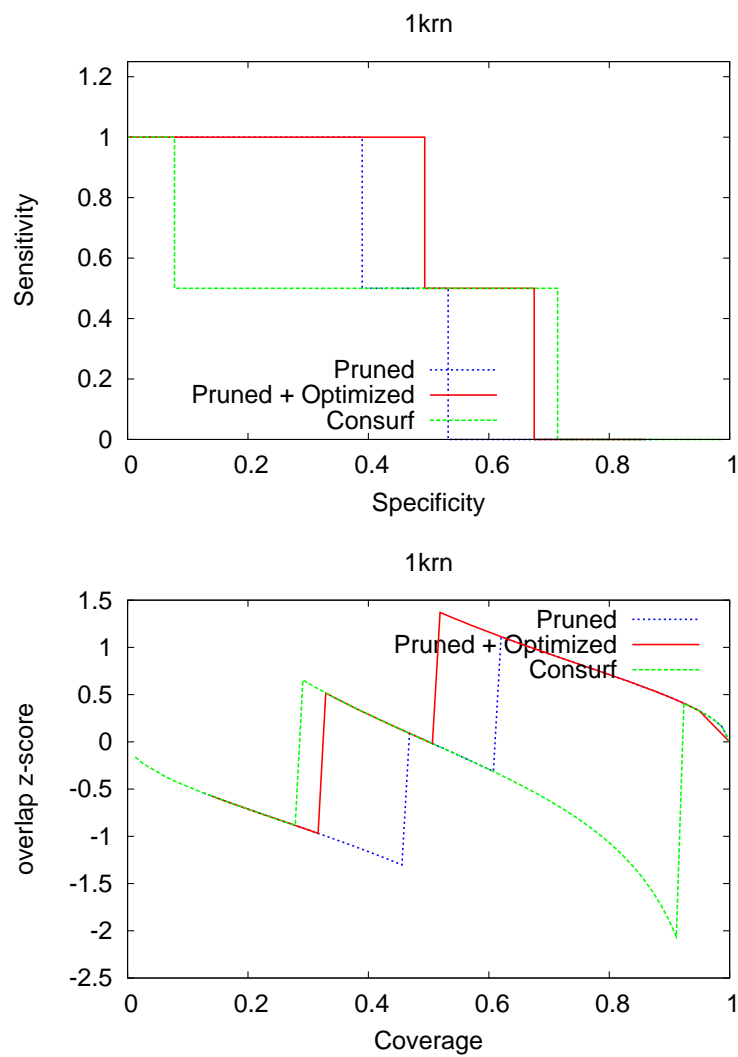

Figure 122: a) The sensitivity and specificity is shown for the pruned, pruned + optimized and the comparison method Consurf for PDBID 1krm. b) The overlap z-scores as a function of rank coverage for the three methods is shown.

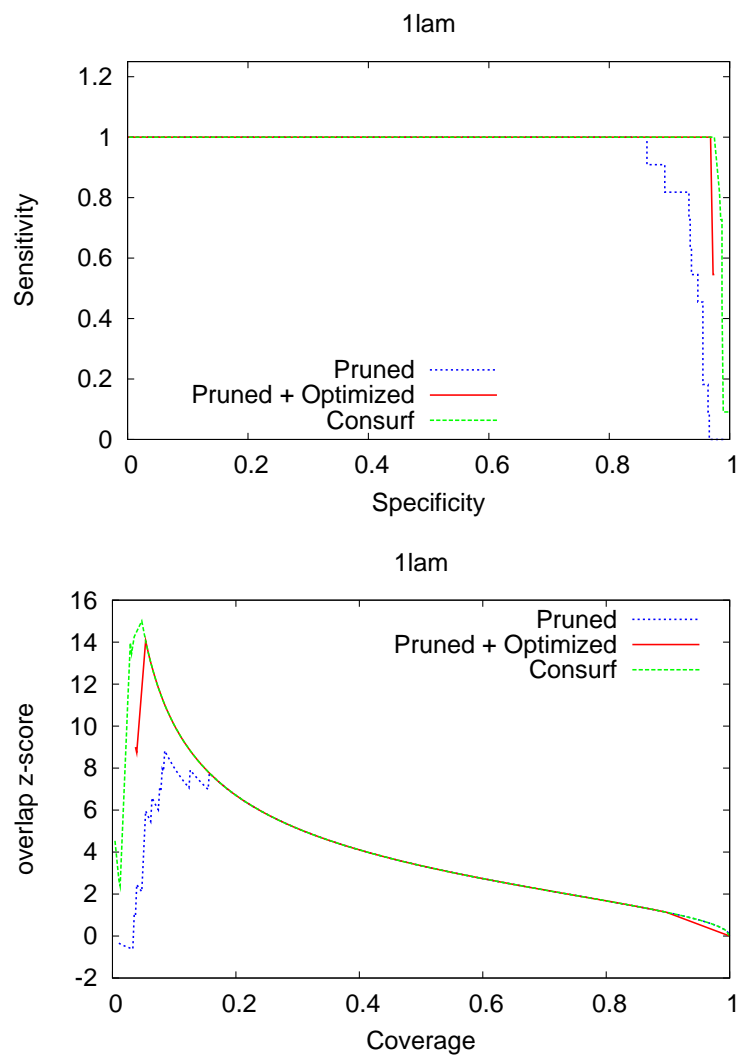

Figure 123: a) The sensitivity and specificity is shown for the pruned, pruned + optimized and the comparison method Consurf for PDBID 1lam. b) The overlap z-scores as a function of rank coverage for the three methods is shown.

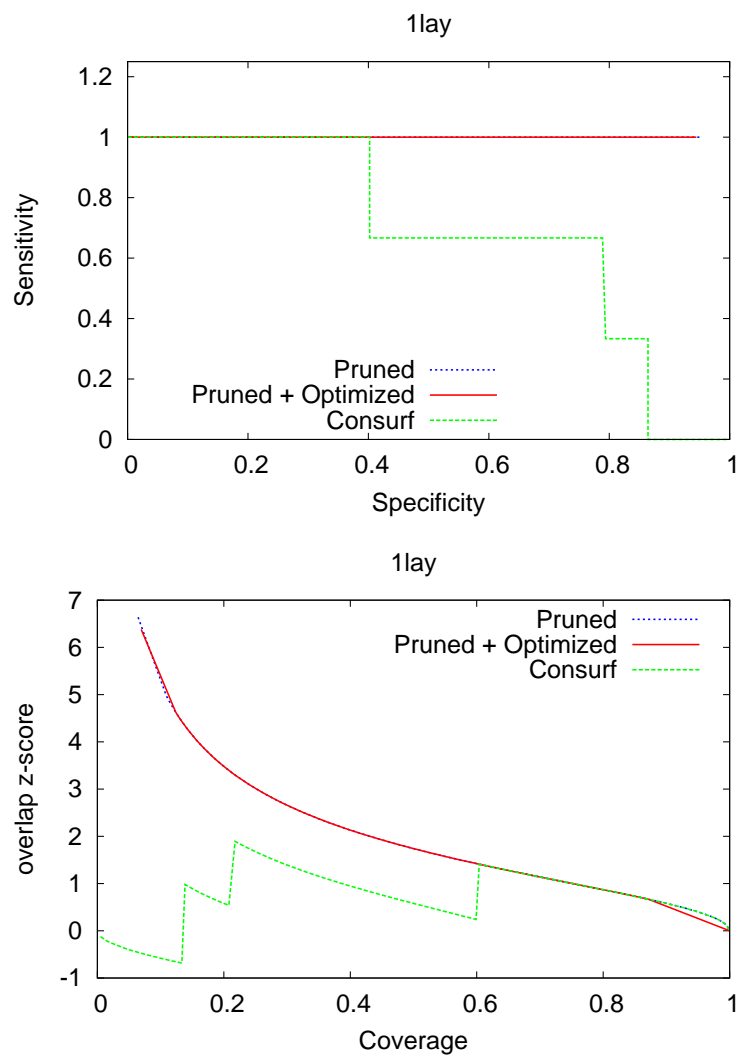

Figure 124: a) The sensitivity and specificity is shown for the pruned, pruned + optimized and the comparison method Consurf for PDBID 1lay. b) The overlap z-scores as a function of rank coverage for the three methods is shown.

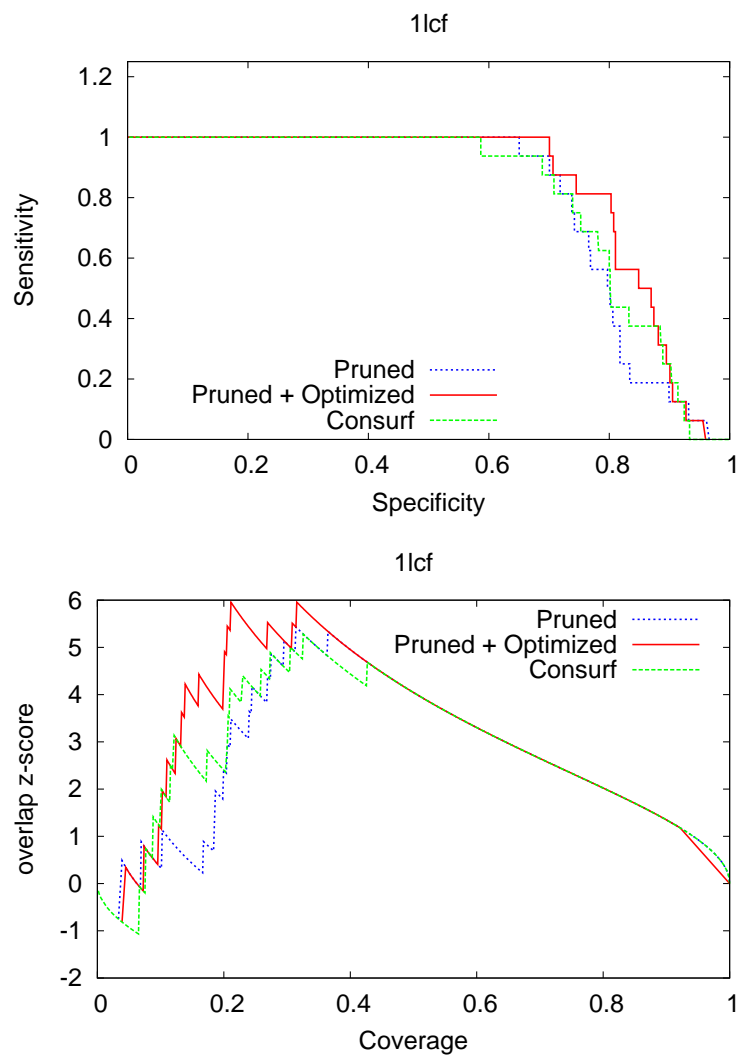

Figure 125: a) The sensitivity and specificity is shown for the pruned, pruned + optimized and the comparison method Consurf for PDBID 1lcf. b) The overlap z-scores as a function of rank coverage for the three methods is shown.



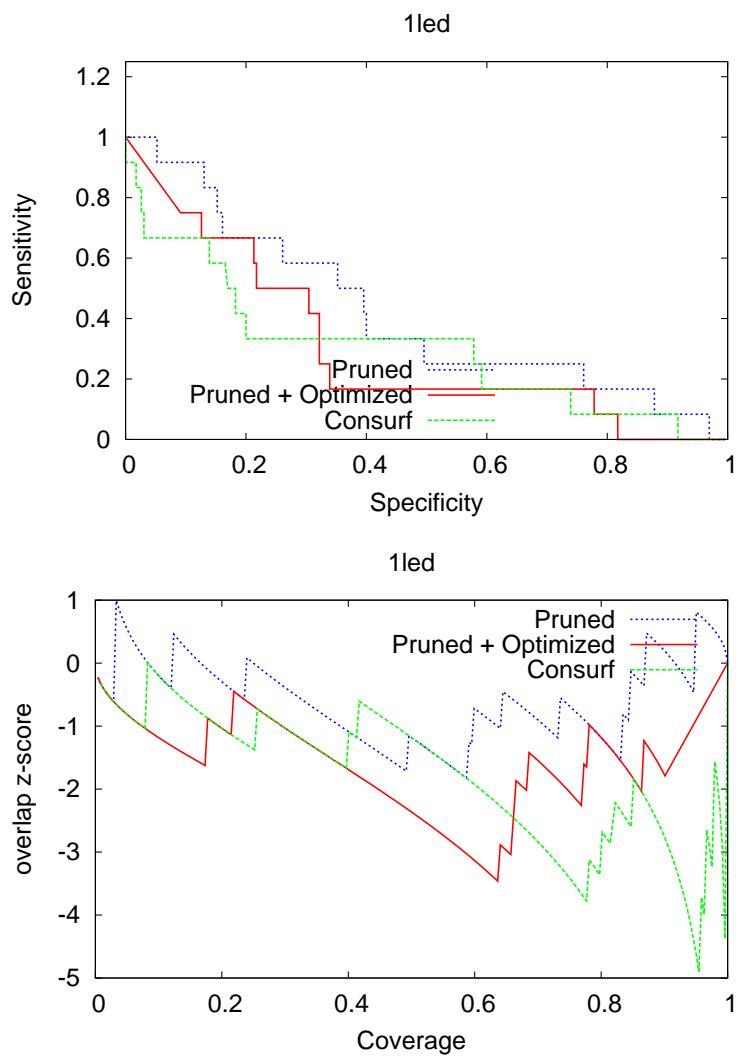

Figure 126: a) The sensitivity and specificity is shown for the pruned, pruned + optimized and the comparison method Consurf for PDBID 1led. b) The overlap z-scores as a function of rank coverage for the three methods is shown.

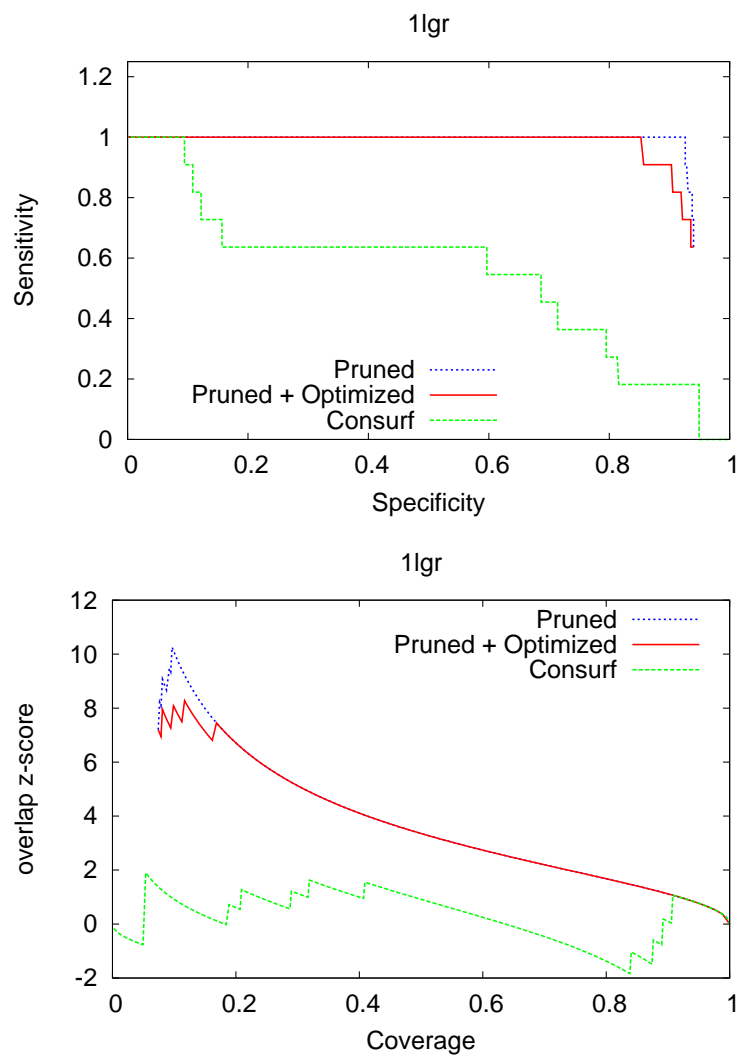

Figure 127: a) The sensitivity and specificity is shown for the pruned, pruned + optimized and the comparison method Consurf for PDBID 1lgr. b) The overlap z-scores as a function of rank coverage for the three methods is shown.

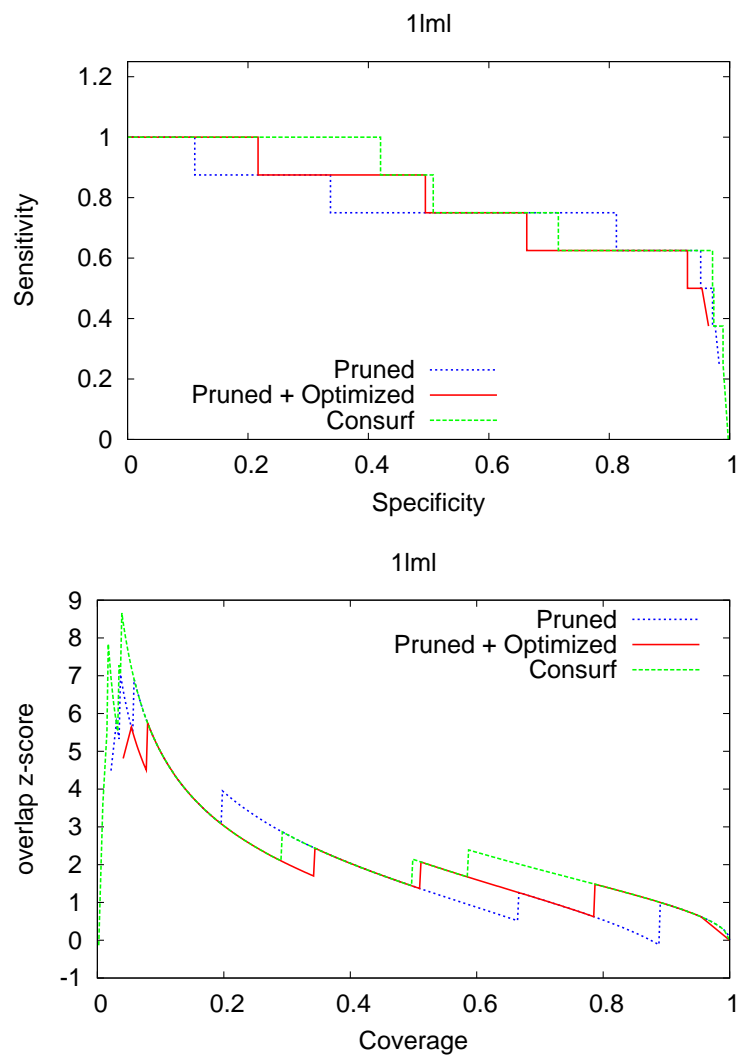

Figure 128: a) The sensitivity and specificity is shown for the pruned, pruned + optimized and the comparison method Consurf for PDBID 1ml. b) The overlap z-scores as a function of rank coverage for the three methods is shown.

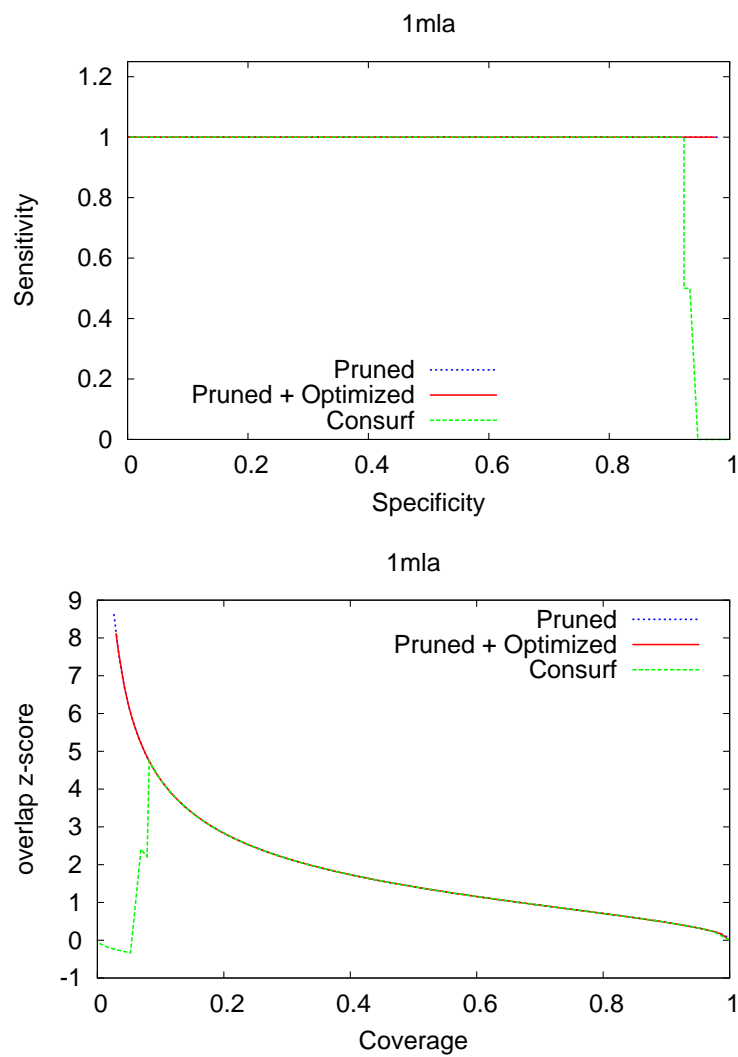

Figure 129: a) The sensitivity and specificity is shown for the pruned, pruned + optimized and the comparison method Consurf for PDBID 1mla. b) The overlap z-scores as a function of rank coverage for the three methods is shown.

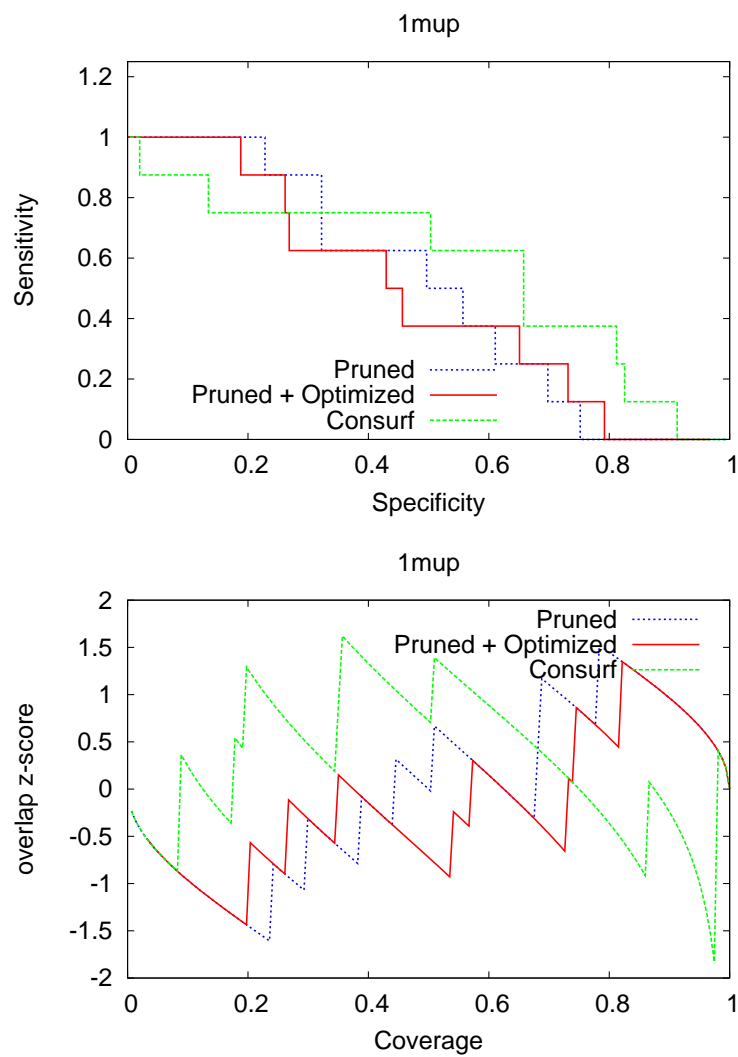

Figure 130: a) The sensitivity and specificity is shown for the pruned, pruned + optimized and the comparison method Consurf for PDBID 1mup. b) The overlap z-scores as a function of rank coverage for the three methods is shown.

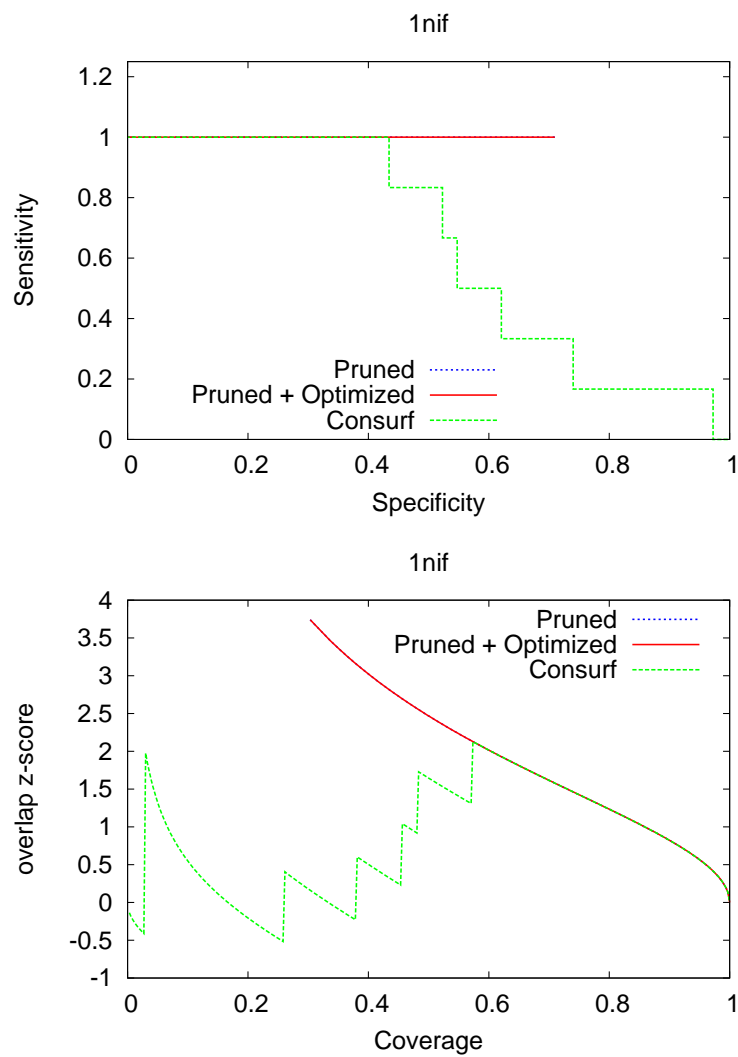

Figure 131: a) The sensitivity and specificity is shown for the pruned, pruned + optimized and the comparison method Consurf for PDBID 1nif. b) The overlap z-scores as a function of rank coverage for the three methods is shown.

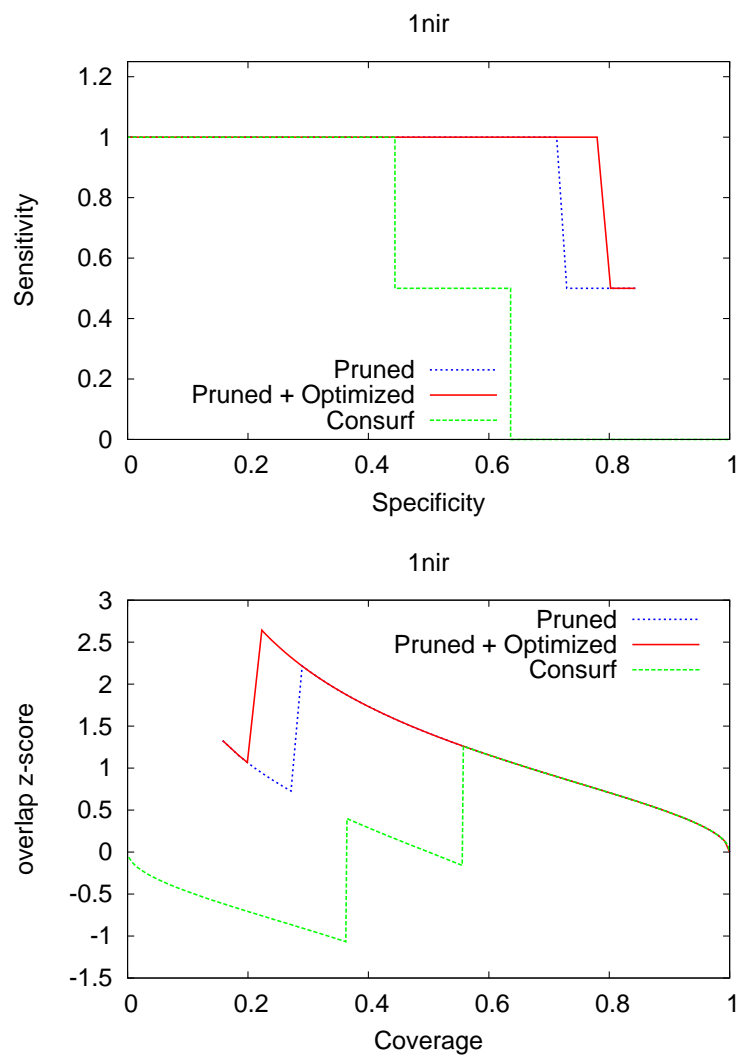

Figure 132: a) The sensitivity and specificity is shown for the pruned, pruned + optimized and the comparison method Consurf for PDBID 1nir. b) The overlap z-scores as a function of rank coverage for the three methods is shown.

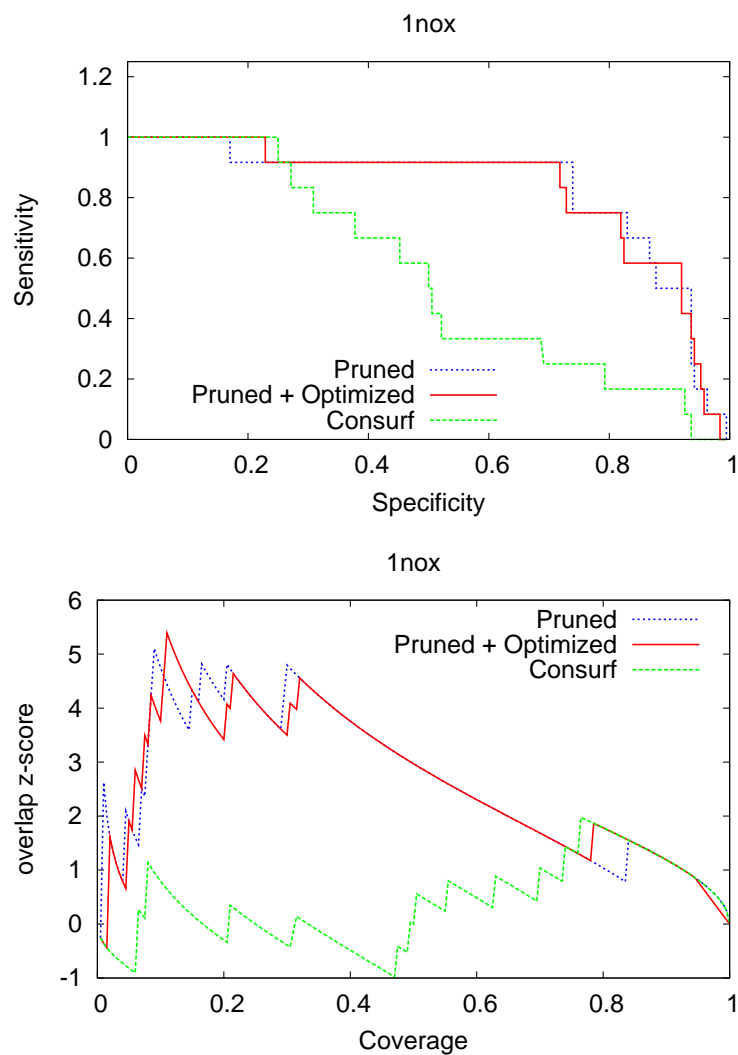

Figure 133: a) The sensitivity and specificity is shown for the pruned, pruned + optimized and the comparison method Consurf for PDBID 1nox. b) The overlap z-scores as a function of rank coverage for the three methods is shown.



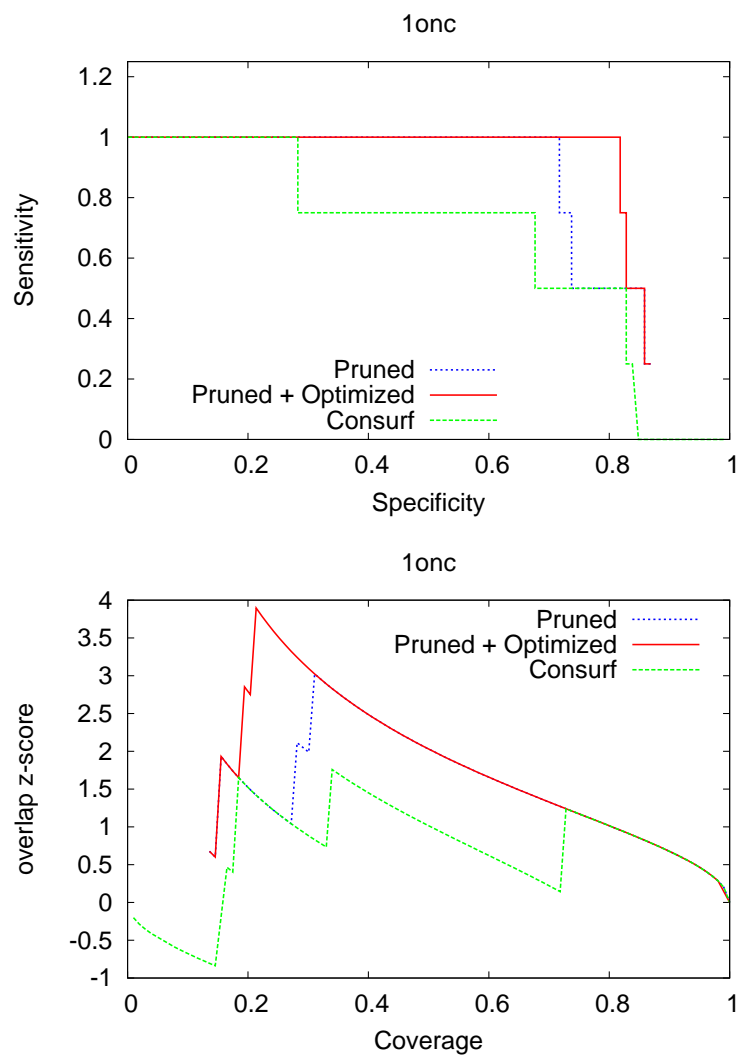

Figure 134: a) The sensitivity and specificity is shown for the pruned, pruned + optimized and the comparison method Consurf for PDBID 1onc. b) The overlap z-scores as a function of rank coverage for the three methods is shown.

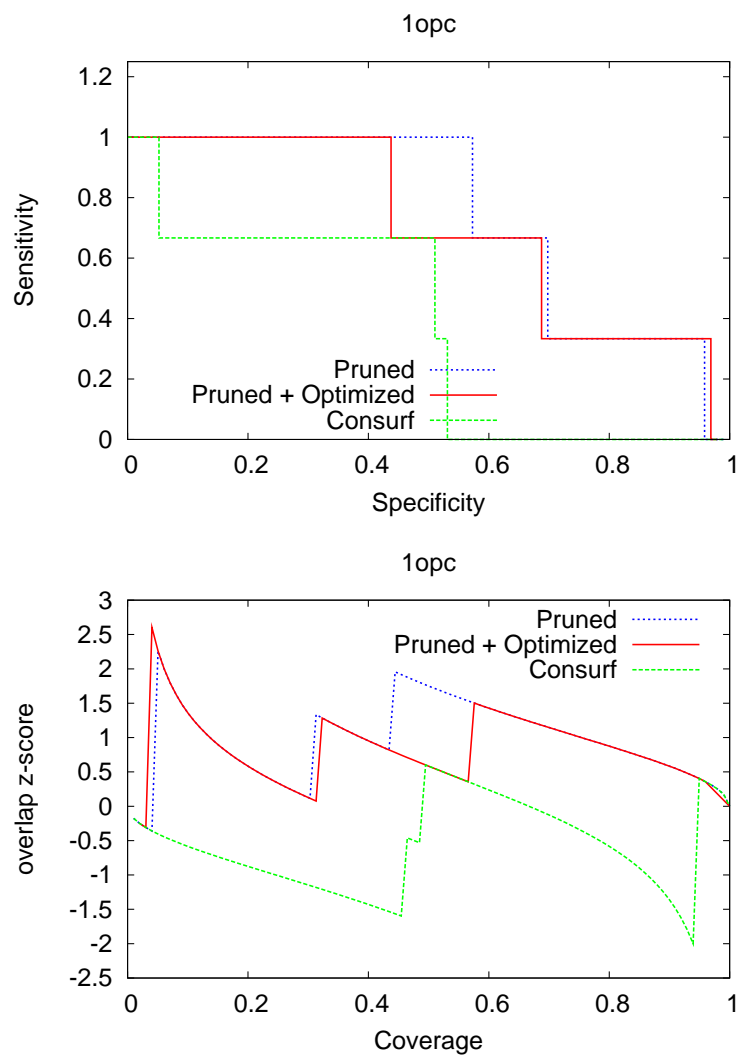

Figure 135: a) The sensitivity and specificity is shown for the pruned, pruned + optimized and the comparison method Consurf for PDBID 1opc. b) The overlap z-scores as a function of rank coverage for the three methods is shown.

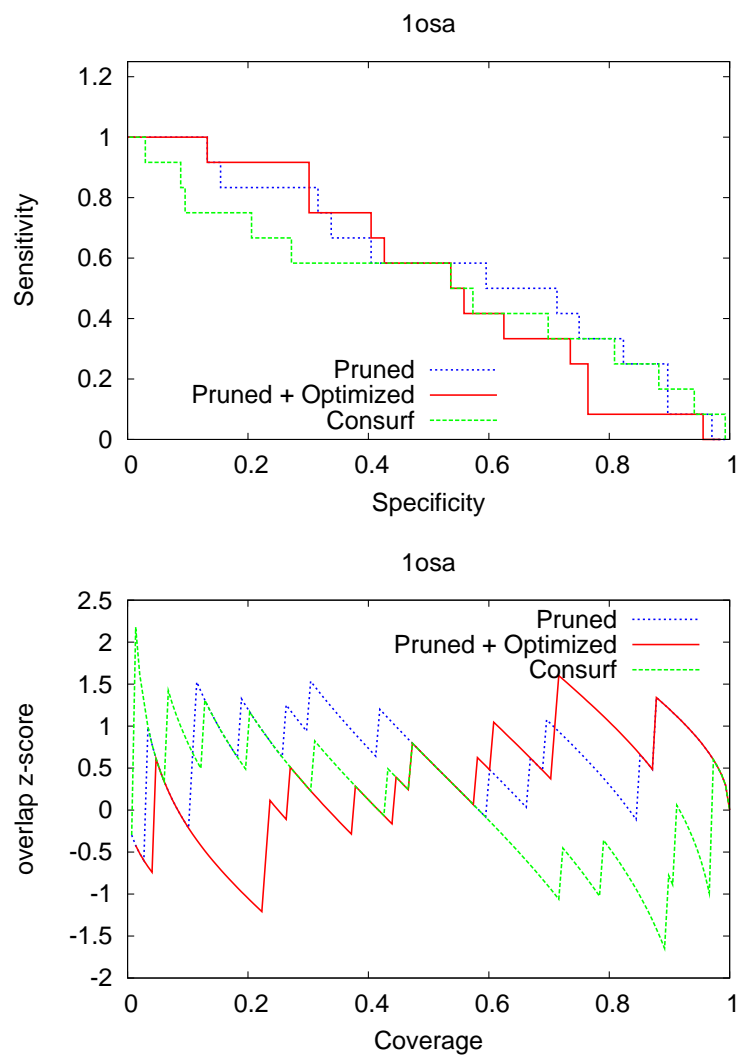

Figure 136: a) The sensitivity and specificity is shown for the pruned, pruned + optimized and the comparison method Consurf for PDBID 1osa. b) The overlap z-scores as a function of rank coverage for the three methods is shown.

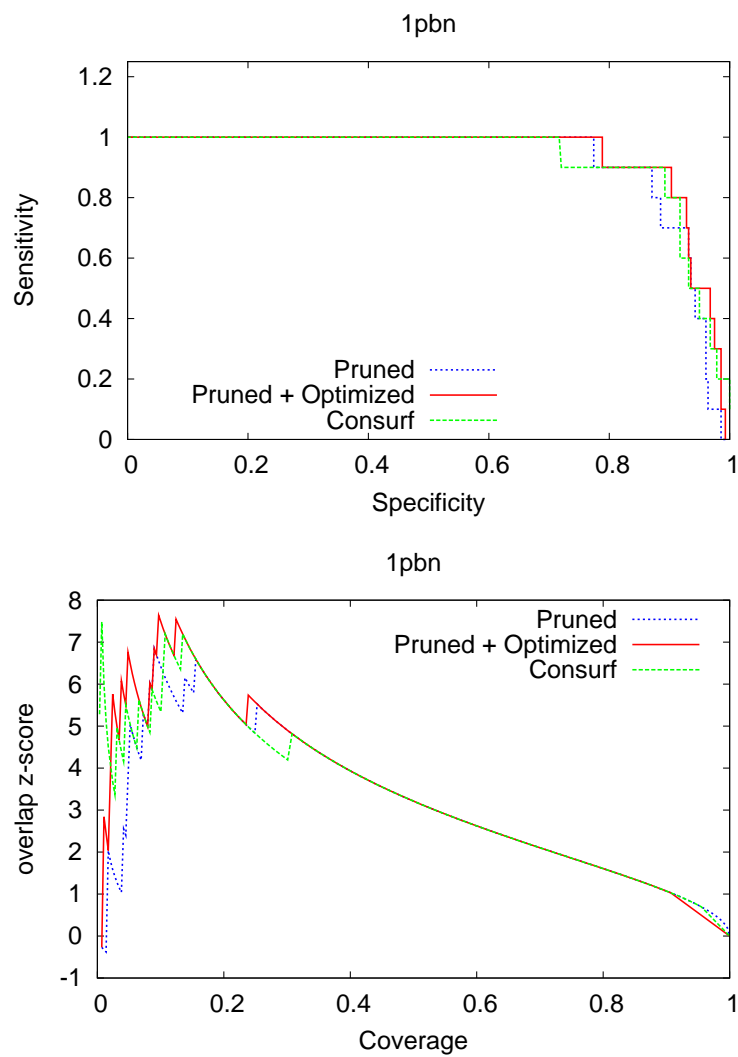

Figure 137: a) The sensitivity and specificity is shown for the pruned, pruned + optimized and the comparison method Consurf for PDBID 1pbn. b) The overlap z-scores as a function of rank coverage for the three methods is shown.

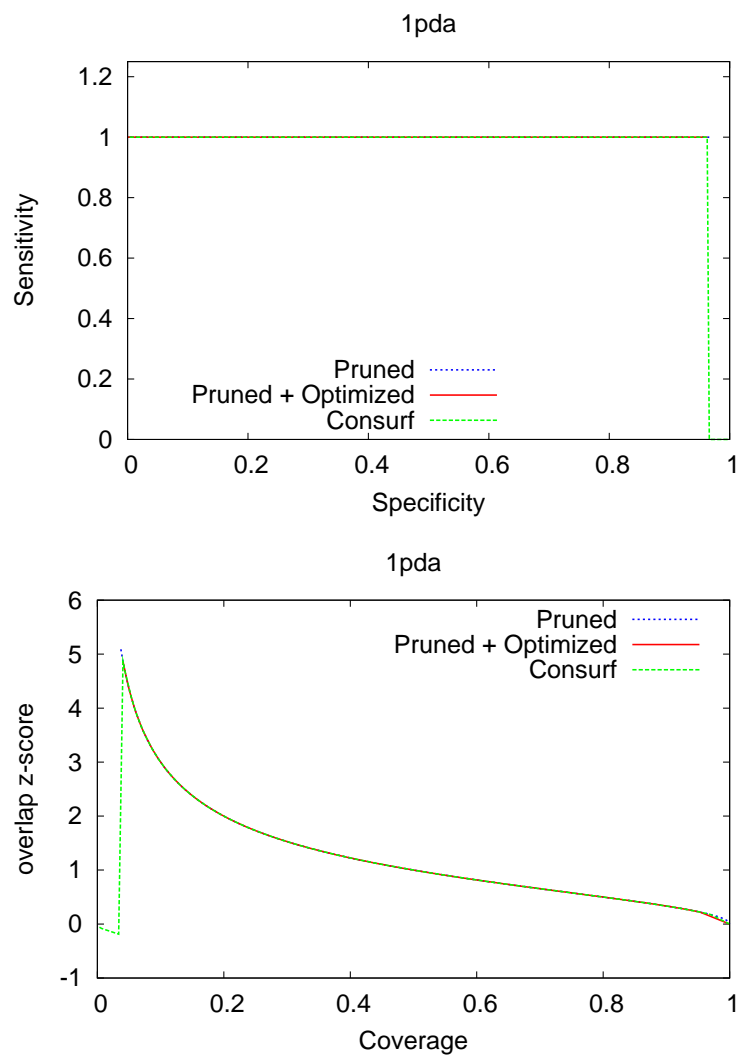

Figure 138: a) The sensitivity and specificity is shown for the pruned, pruned + optimized and the comparison method Consurf for PDBID 1pda. b) The overlap z-scores as a function of rank coverage for the three methods is shown.

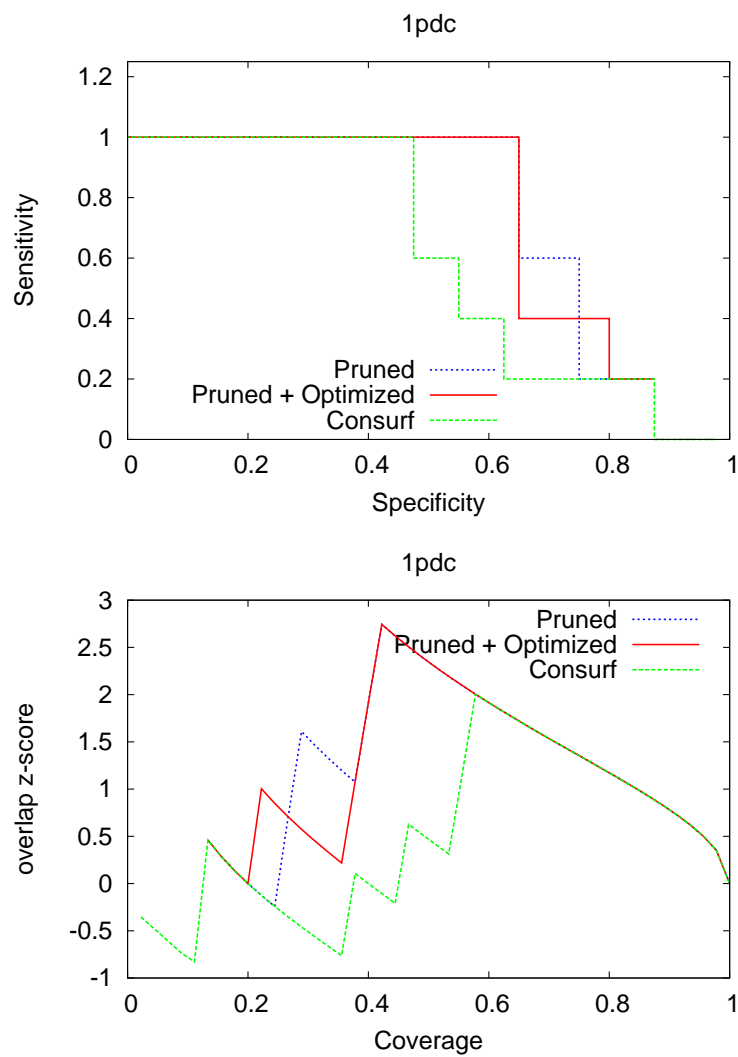

Figure 139: a) The sensitivity and specificity is shown for the pruned, pruned + optimized and the comparison method Consurf for PDBID 1pdc. b) The overlap z-scores as a function of rank coverage for the three methods is shown.

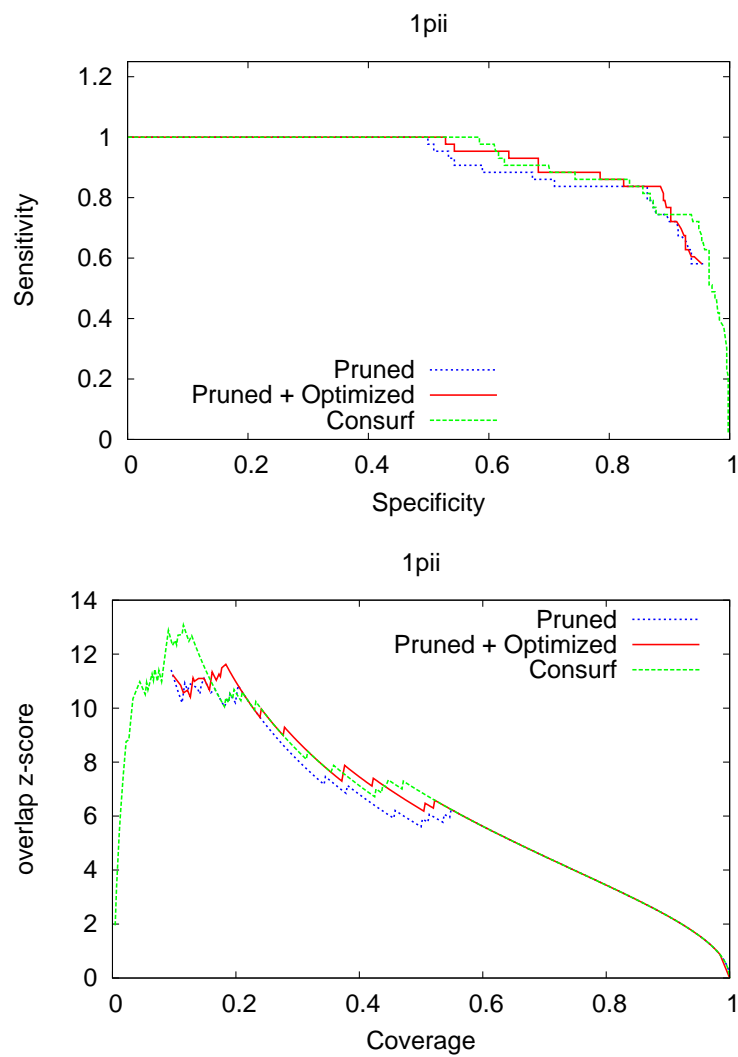

Figure 140: a) The sensitivity and specificity is shown for the pruned, pruned + optimized and the comparison method Consurf for PDBID 1pii. b) The overlap z-scores as a function of rank coverage for the three methods is shown.

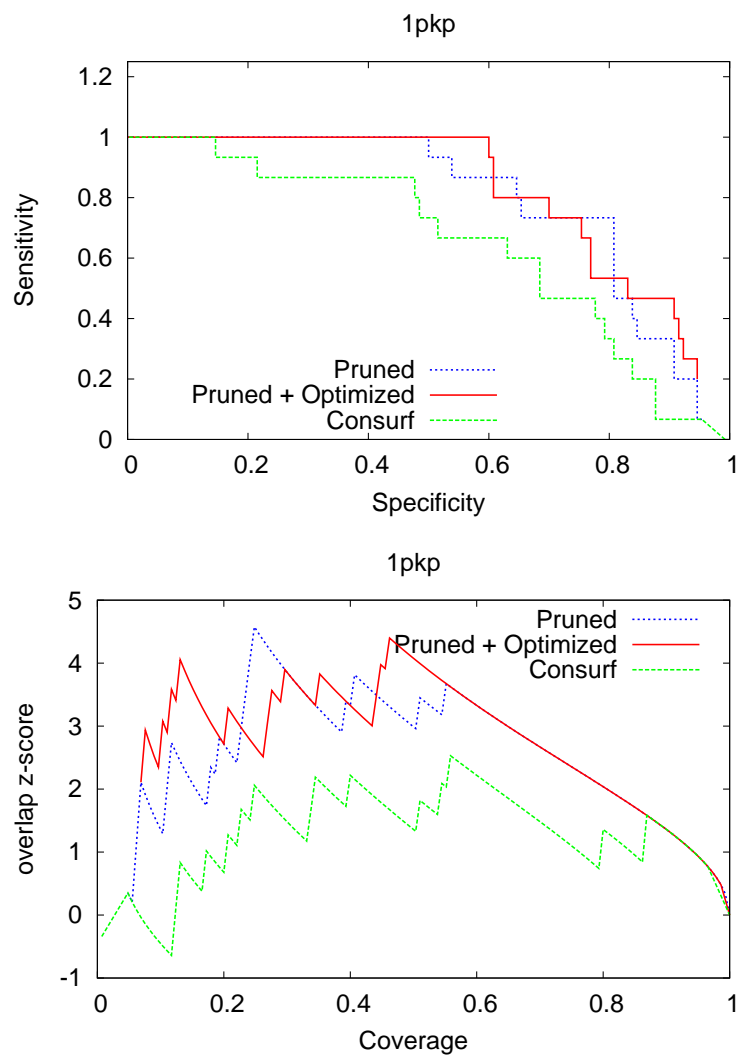

Figure 141: a) The sensitivity and specificity is shown for the pruned, pruned + optimized and the comparison method Consurf for PDBID 1pkp. b) The overlap z-scores as a function of rank coverage for the three methods is shown.



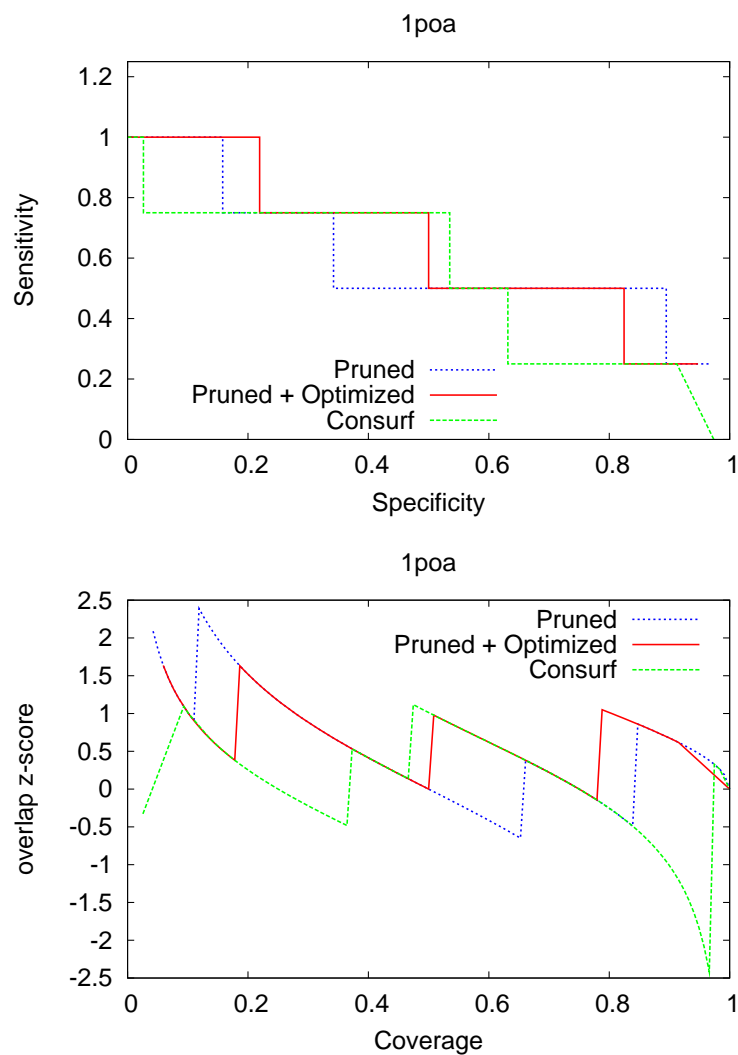

Figure 142: a) The sensitivity and specificity is shown for the pruned, pruned + optimized and the comparison method Consurf for PDBID 1poa. b) The overlap z-scores as a function of rank coverage for the three methods is shown.

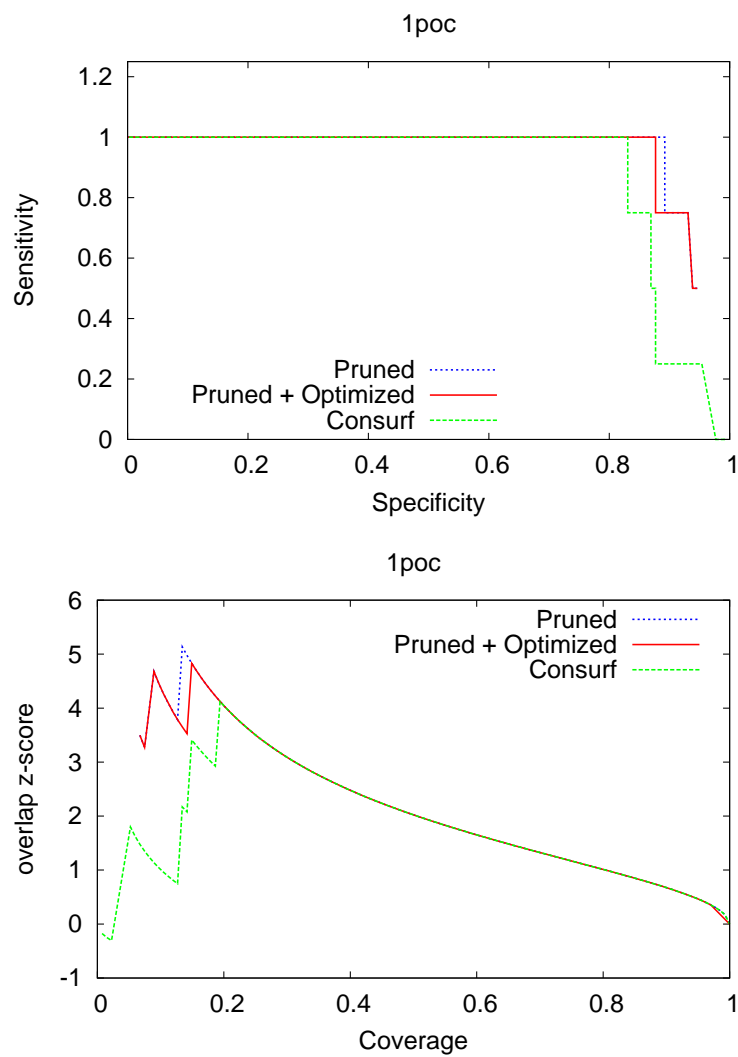

Figure 143: a) The sensitivity and specificity is shown for the pruned, pruned + optimized and the comparison method Consurf for PDBID 1poc. b) The overlap z-scores as a function of rank coverage for the three methods is shown.

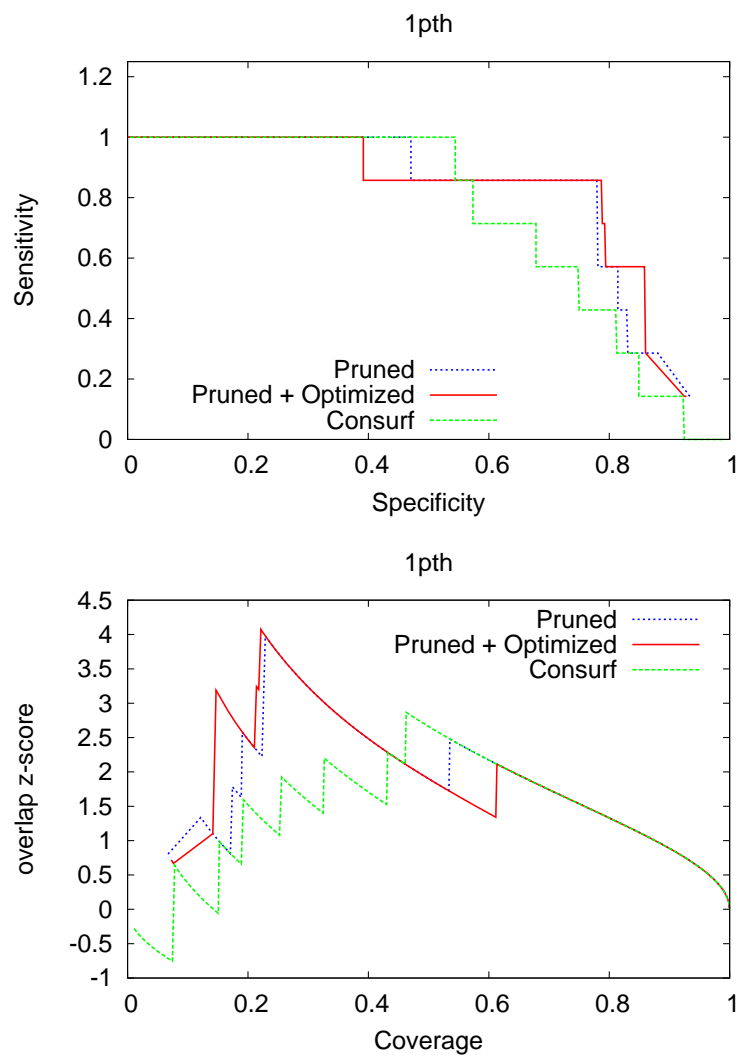

Figure 144: a) The sensitivity and specificity is shown for the pruned, pruned + optimized and the comparison method Consurf for PDBID 1pth. b) The overlap z-scores as a function of rank coverage for the three methods is shown.

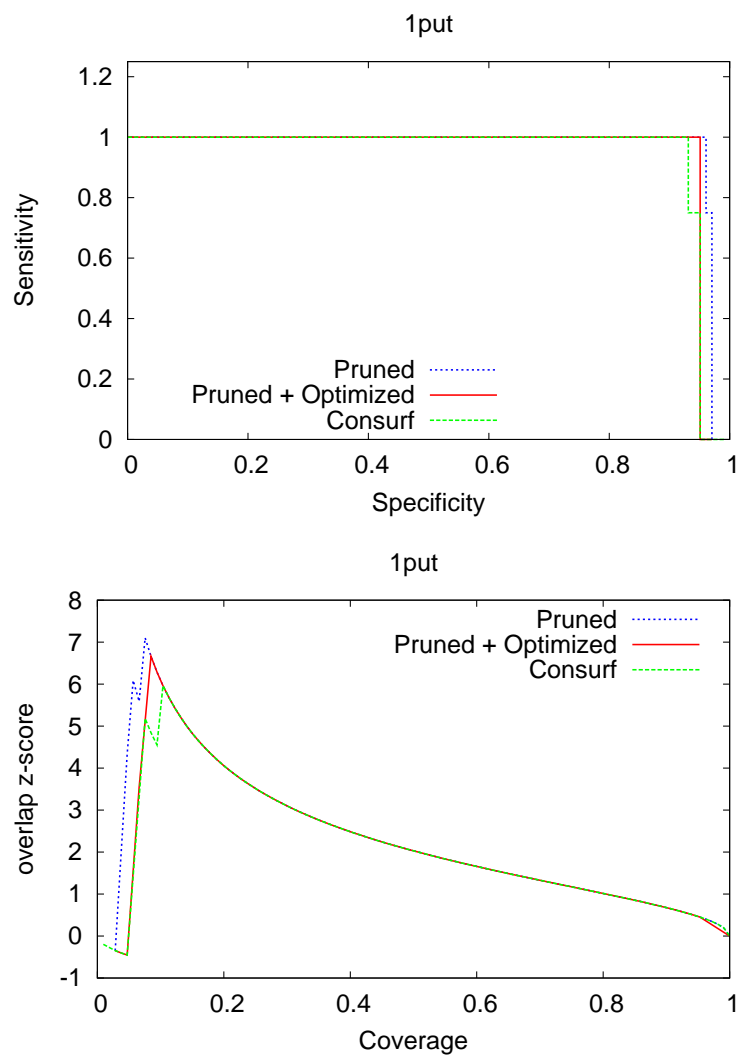

Figure 145: a) The sensitivity and specificity is shown for the pruned, pruned + optimized and the comparison method Consurf for PDBID 1put. b) The overlap z-scores as a function of rank coverage for the three methods is shown.

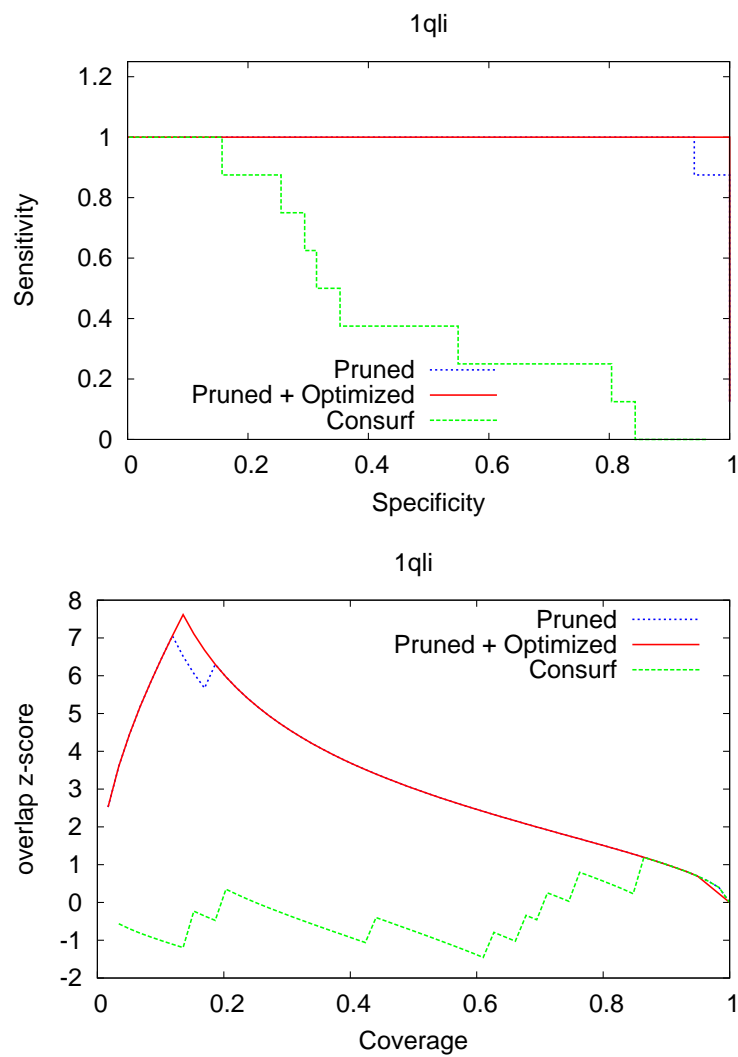

Figure 146: a) The sensitivity and specificity is shown for the pruned, pruned + optimized and the comparison method Consurf for PDBID 1qli. b) The overlap z-scores as a function of rank coverage for the three methods is shown.

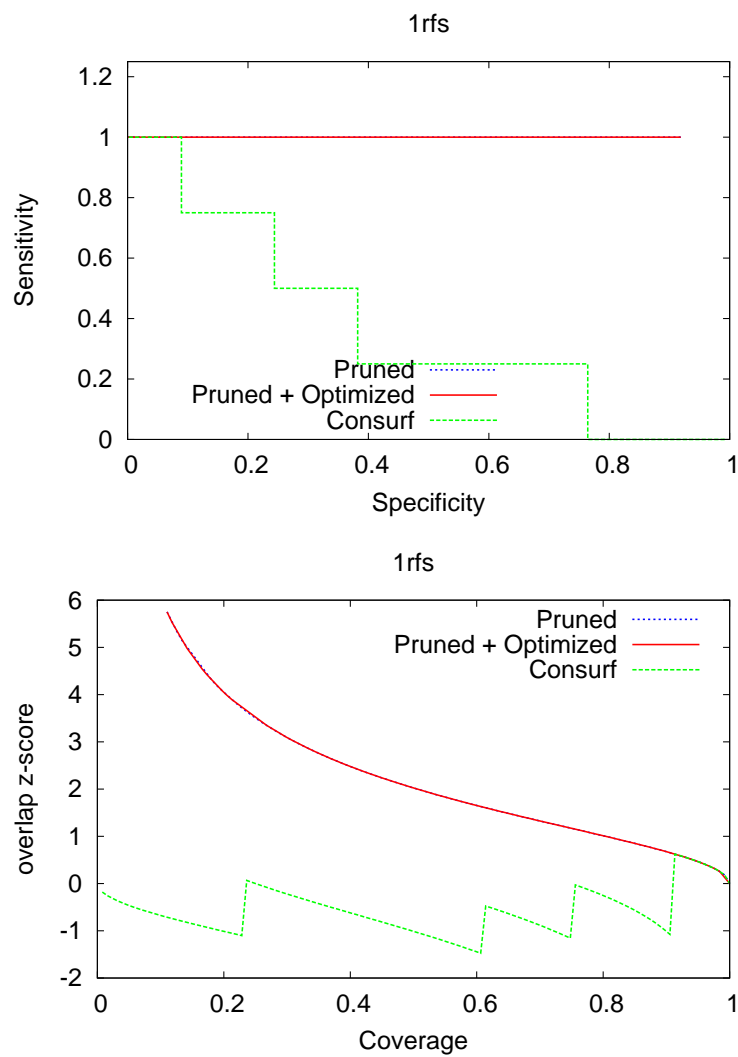

Figure 147: a) The sensitivity and specificity is shown for the pruned, pruned + optimized and the comparison method Consurf for PDBID 1rfs. b) The overlap z-scores as a function of rank coverage for the three methods is shown.

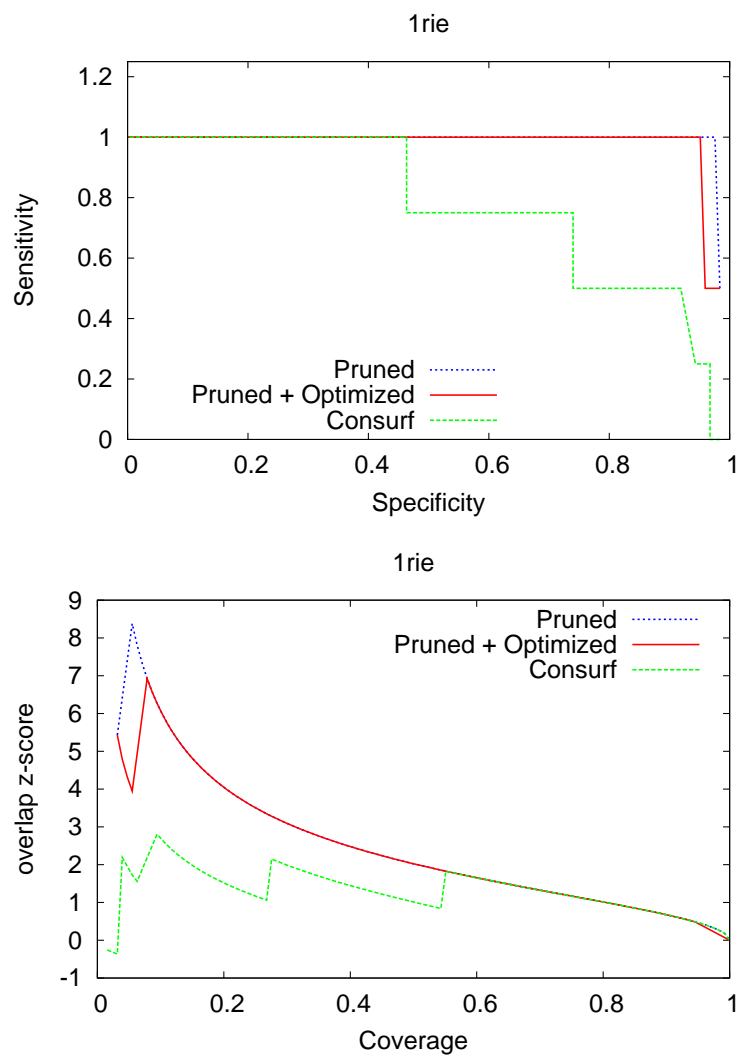

Figure 148: a) The sensitivity and specificity is shown for the pruned, pruned + optimized and the comparison method Consurf for PDBID 1rie. b) The overlap z-scores as a function of rank coverage for the three methods is shown.

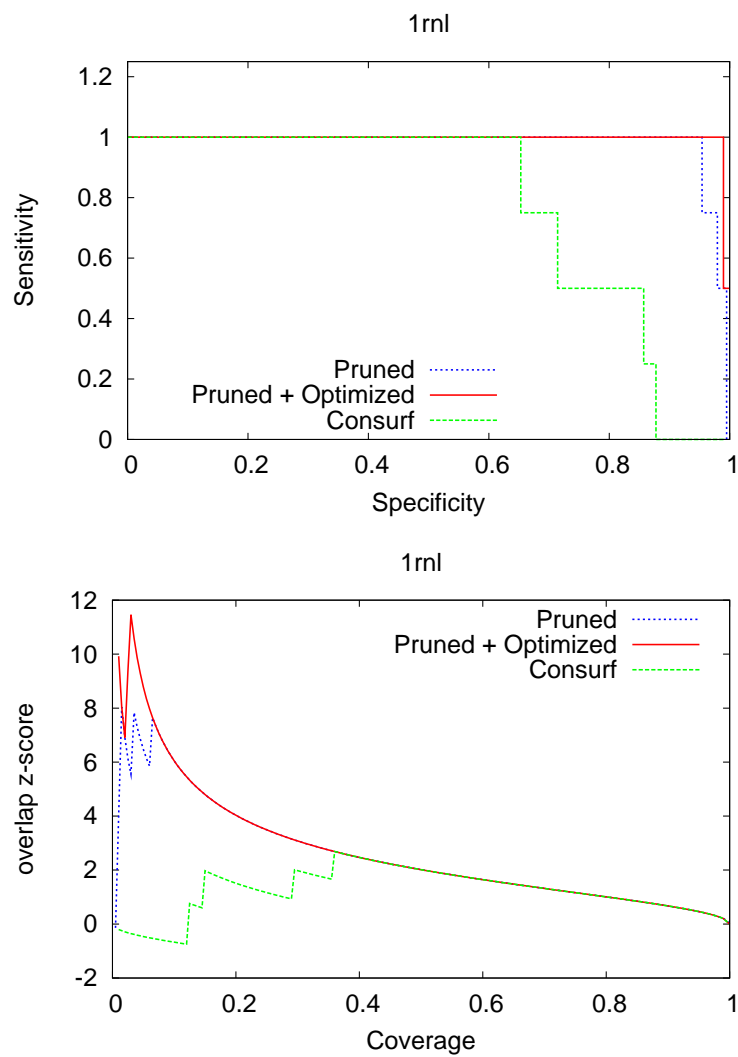

Figure 149: a) The sensitivity and specificity is shown for the pruned, pruned + optimized and the comparison method Consurf for PDBID 1rnl. b) The overlap z-scores as a function of rank coverage for the three methods is shown.



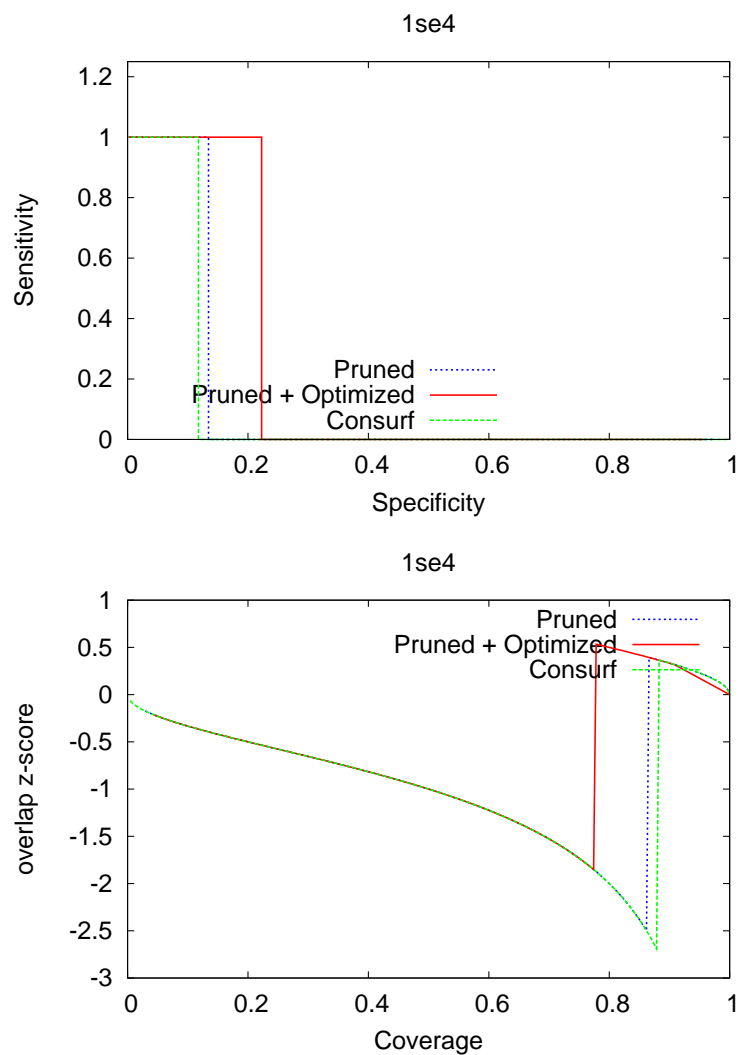

Figure 150: a) The sensitivity and specificity is shown for the pruned, pruned + optimized and the comparison method Consurf for PDBID 1se4. b) The overlap z-scores as a function of rank coverage for the three methods is shown.

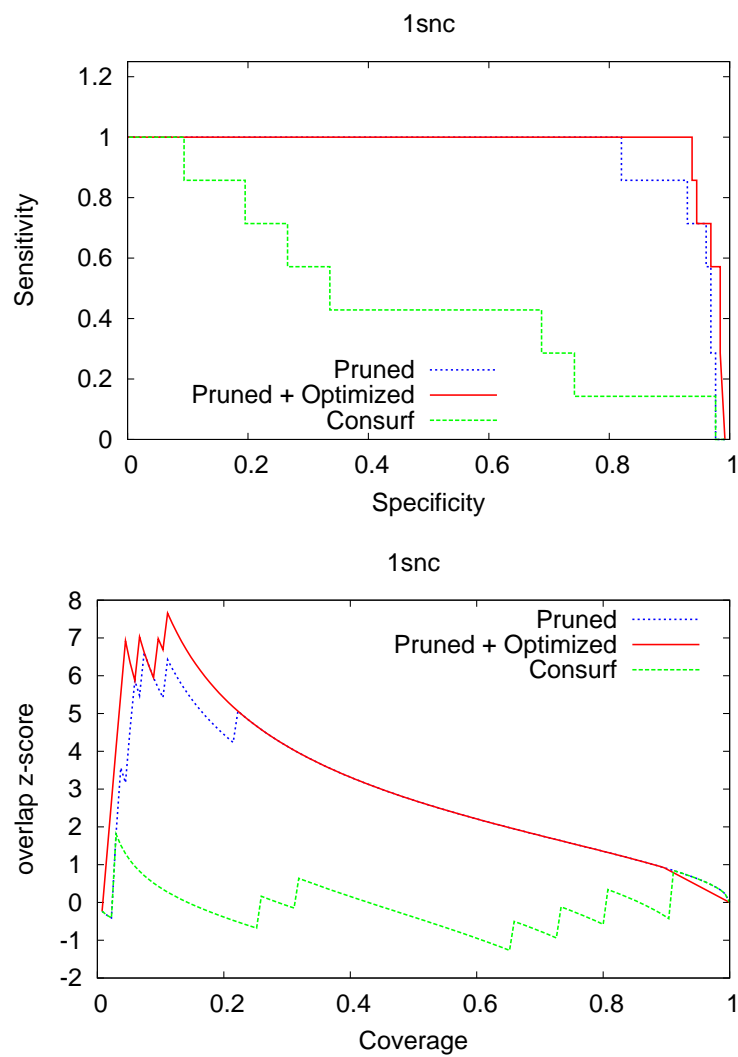

Figure 151: a) The sensitivity and specificity is shown for the pruned, pruned + optimized and the comparison method Consurf for PDBID 1snc. b) The overlap z-scores as a function of rank coverage for the three methods is shown.

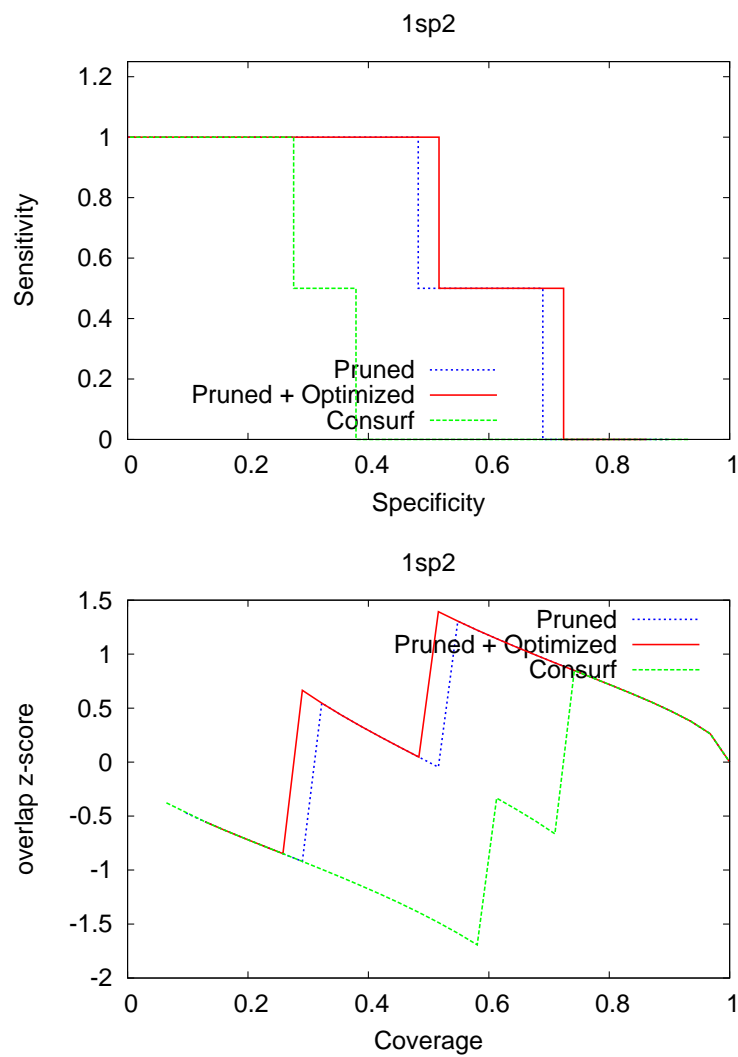

Figure 152: a) The sensitivity and specificity is shown for the pruned, pruned + optimized and the comparison method Consurf for PDBID 1sp2. b) The overlap z-scores as a function of rank coverage for the three methods is shown.

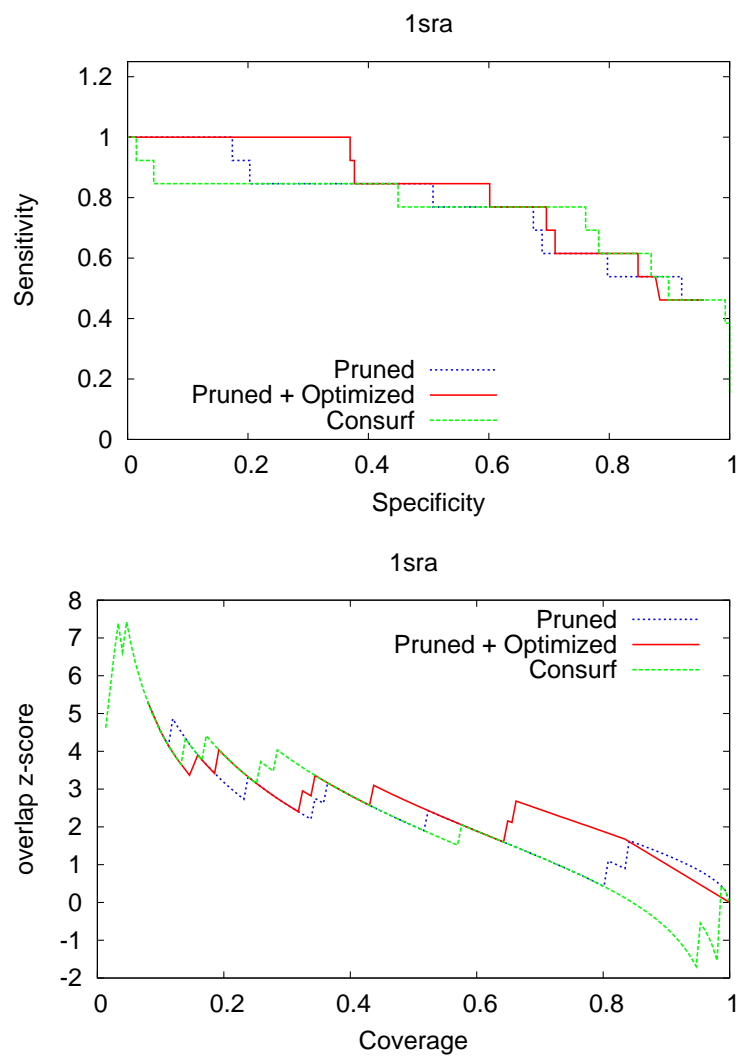

Figure 153: a) The sensitivity and specificity is shown for the pruned, pruned + optimized and the comparison method Consurf for PDBID 1sra. b) The overlap z-scores as a function of rank coverage for the three methods is shown.

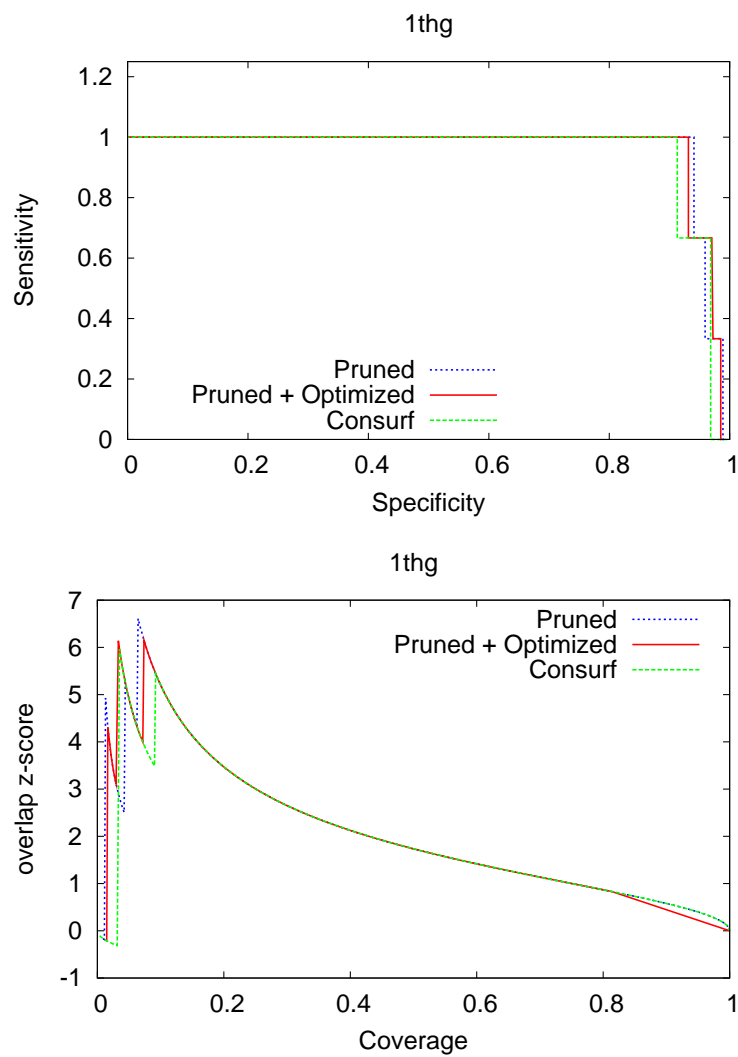

Figure 154: a) The sensitivity and specificity is shown for the pruned, pruned + optimized and the comparison method Consurf for PDBID 1thg. b) The overlap z-scores as a function of rank coverage for the three methods is shown.

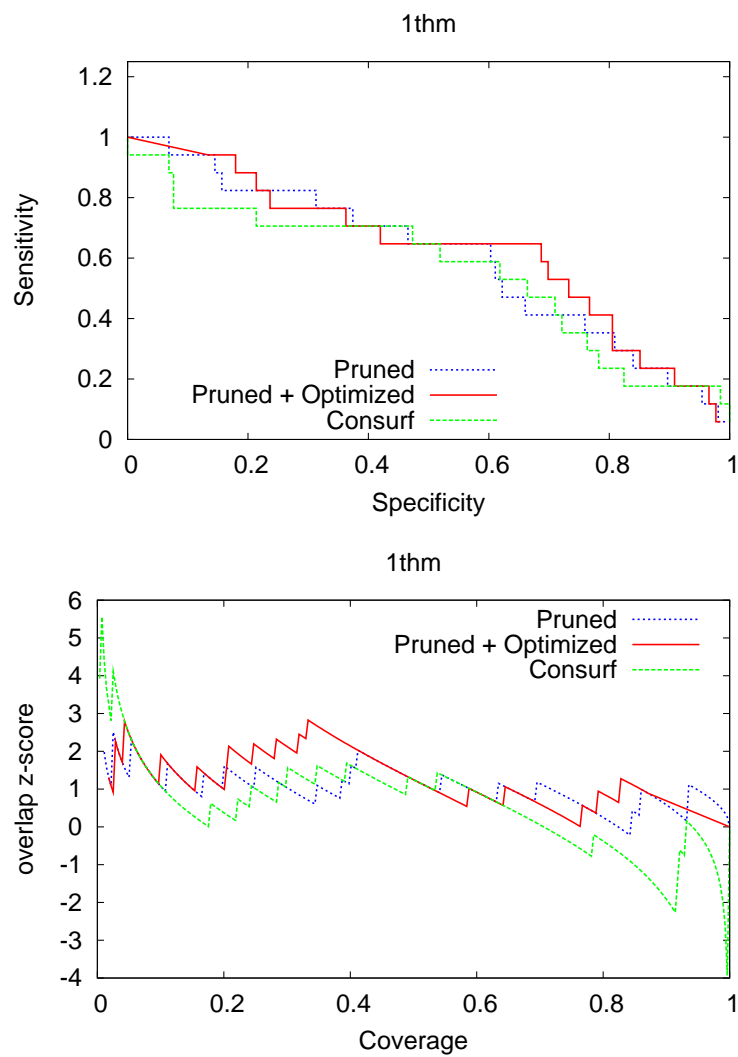

Figure 155: a) The sensitivity and specificity is shown for the pruned, pruned + optimized and the comparison method Consurf for PDBID 1thm. b) The overlap z-scores as a function of rank coverage for the three methods is shown.

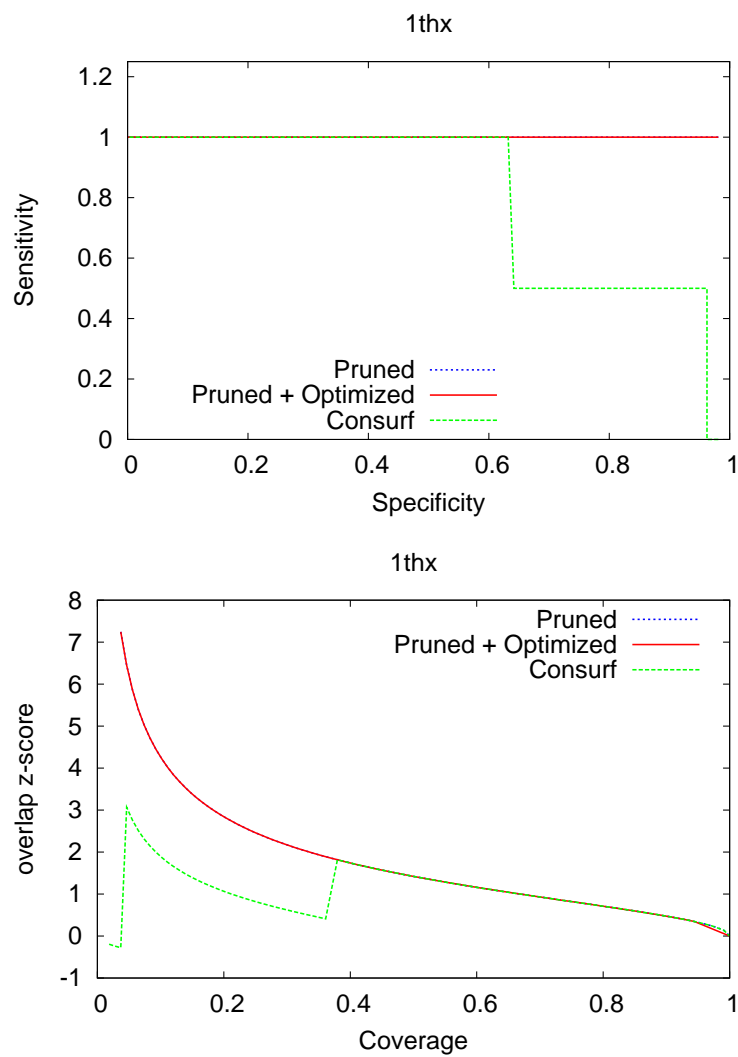

Figure 156: a) The sensitivity and specificity is shown for the pruned, pruned + optimized and the comparison method Consurf for PDBID 1thx. b) The overlap z-scores as a function of rank coverage for the three methods is shown.

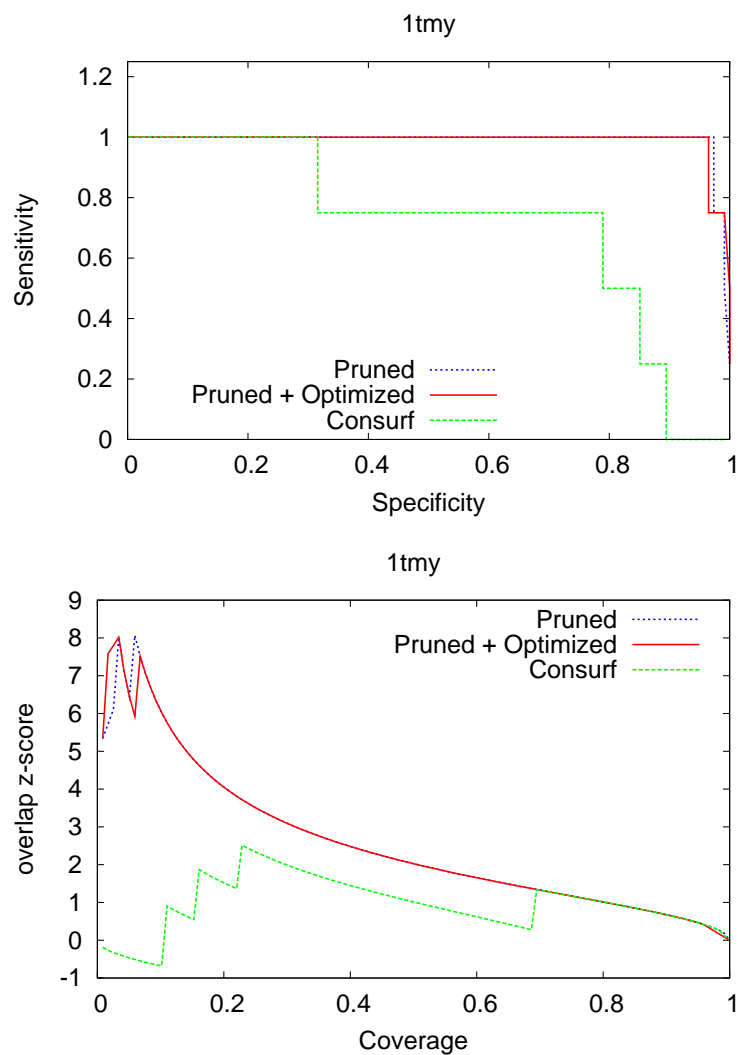

Figure 157: a) The sensitivity and specificity is shown for the pruned, pruned + optimized and the comparison method Consurf for PDBID 1tmy. b) The overlap z-scores as a function of rank coverage for the three methods is shown.



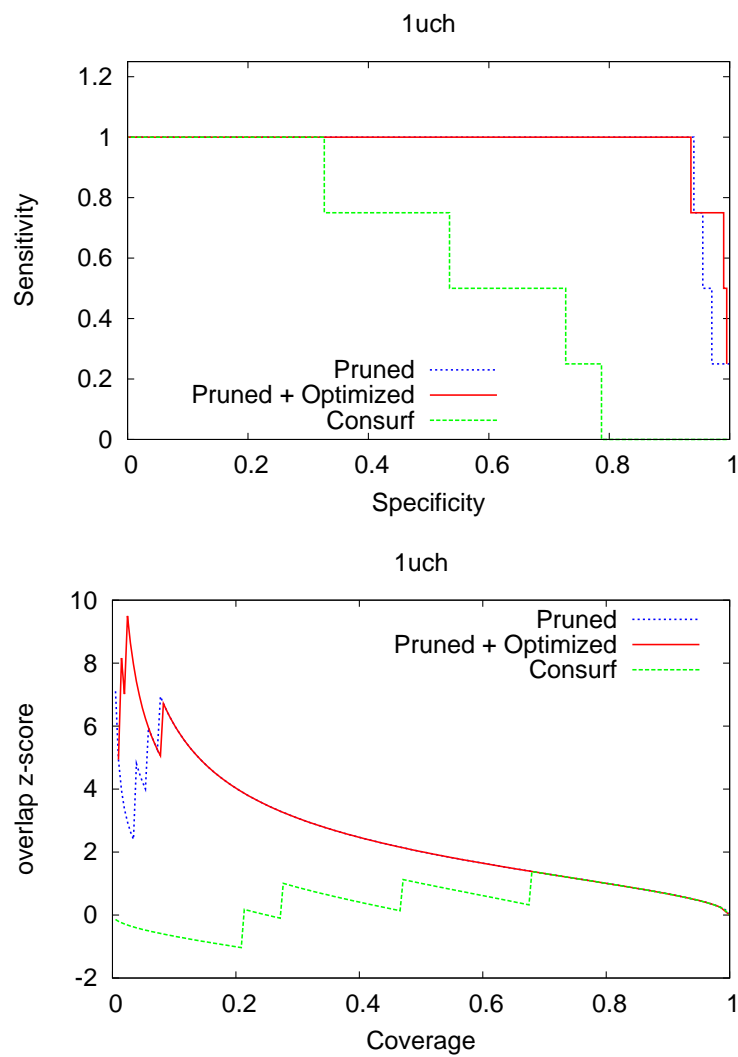

Figure 158: a) The sensitivity and specificity is shown for the pruned, pruned + optimized and the comparison method Consurf for PDBID 1uch. b) The overlap z-scores as a function of rank coverage for the three methods is shown.

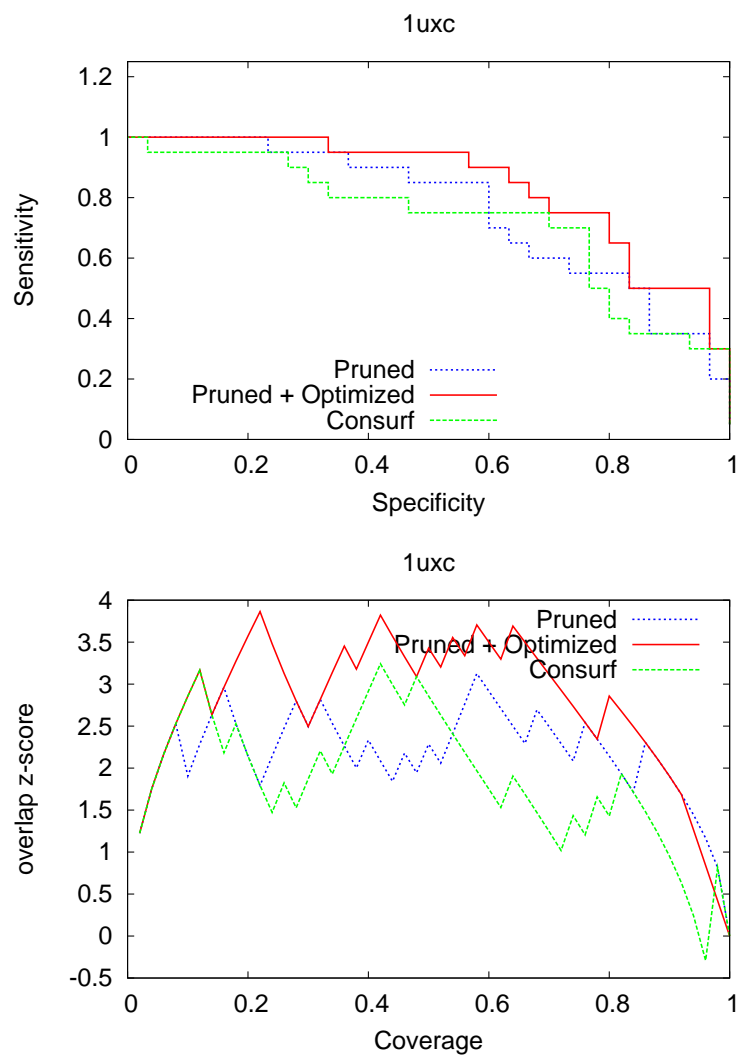

Figure 159: a) The sensitivity and specificity is shown for the pruned, pruned + optimized and the comparison method Consurf for PDBID 1uxc. b) The overlap z-scores as a function of rank coverage for the three methods is shown.

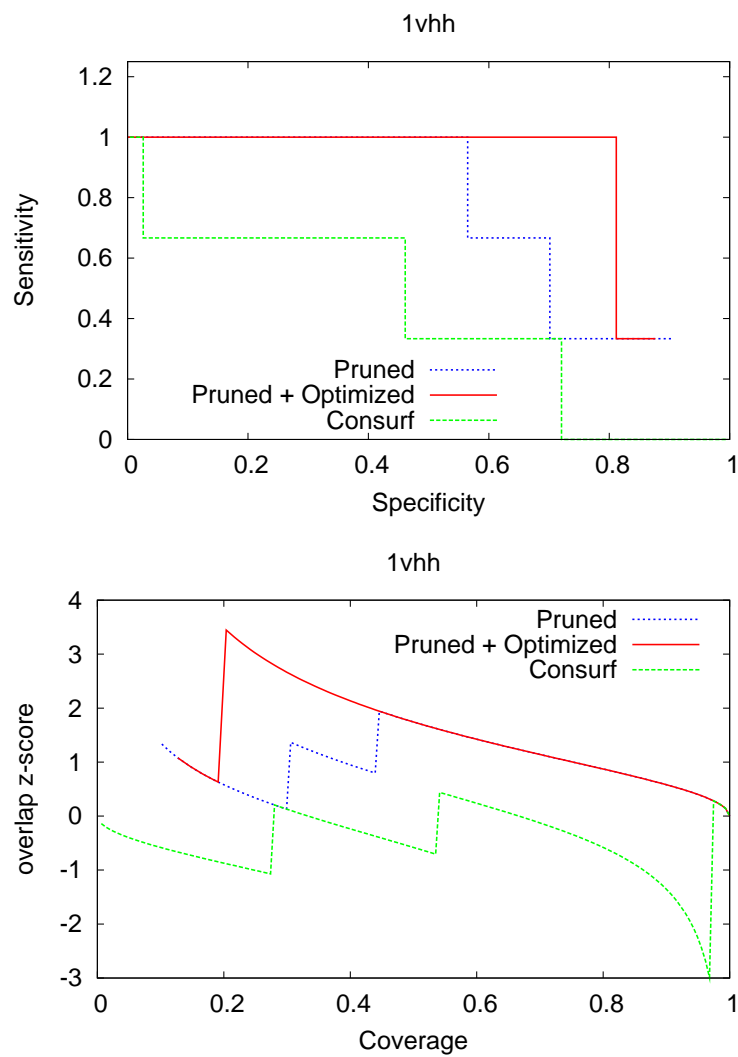

Figure 160: a) The sensitivity and specificity is shown for the pruned, pruned + optimized and the comparison method Consurf for PDBID 1vhh. b) The overlap z-scores as a function of rank coverage for the three methods is shown.

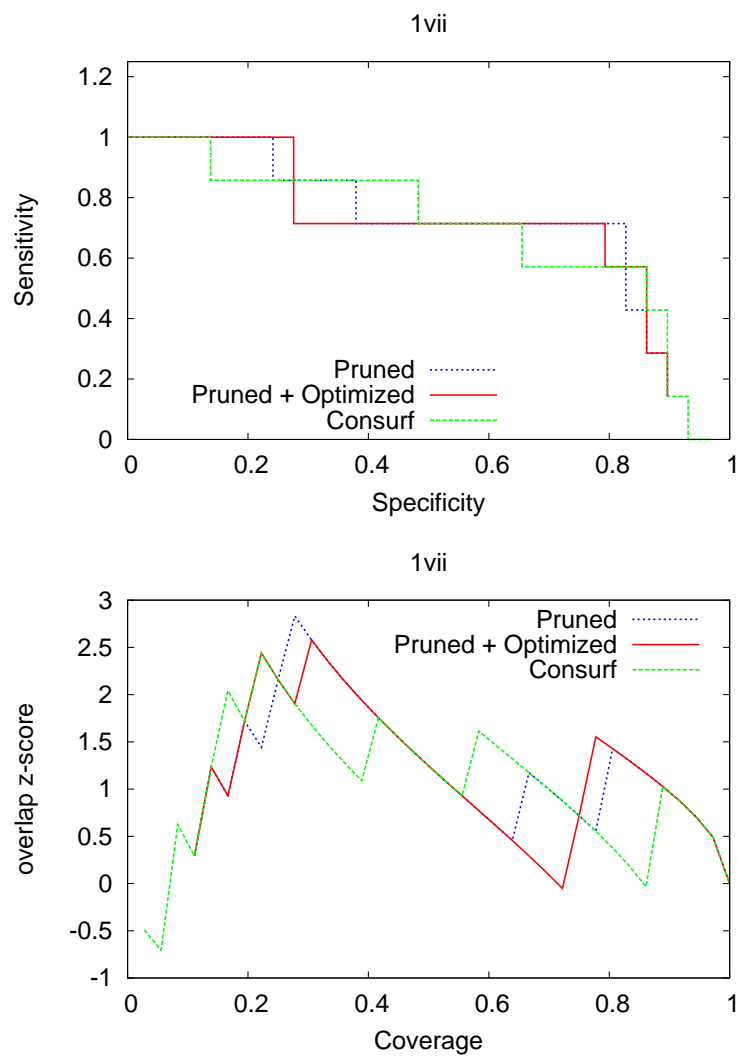

Figure 161: a) The sensitivity and specificity is shown for the pruned, pruned + optimized and the comparison method Consurf for PDBID 1vii. b) The overlap z-scores as a function of rank coverage for the three methods is shown.

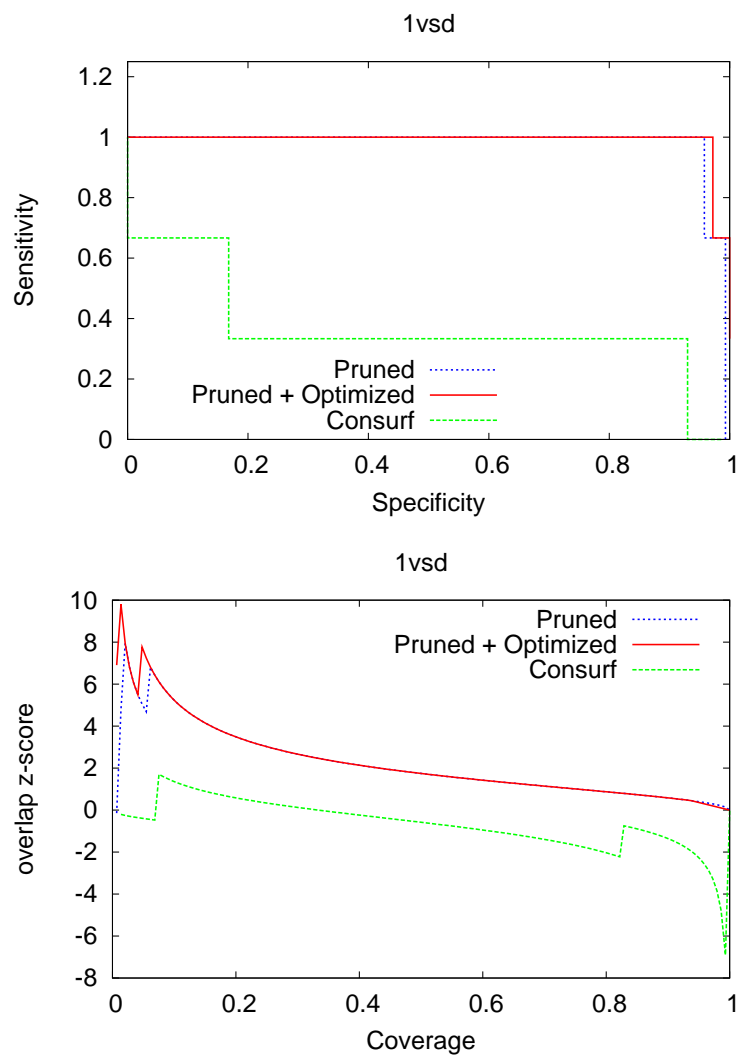

Figure 162: a) The sensitivity and specificity is shown for the pruned, pruned + optimized and the comparison method Consurf for PDBID 1vsd. b) The overlap z-scores as a function of rank coverage for the three methods is shown.

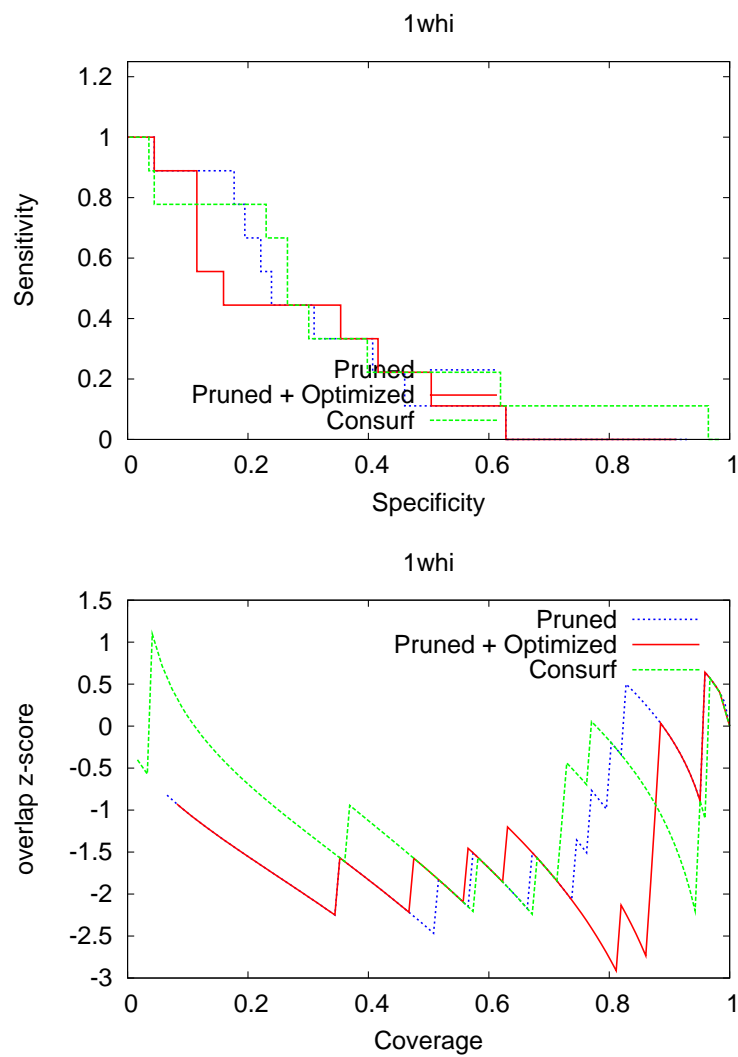

Figure 163: a) The sensitivity and specificity is shown for the pruned, pruned + optimized and the comparison method Consurf for PDBID 1whi. b) The overlap z-scores as a function of rank coverage for the three methods is shown.

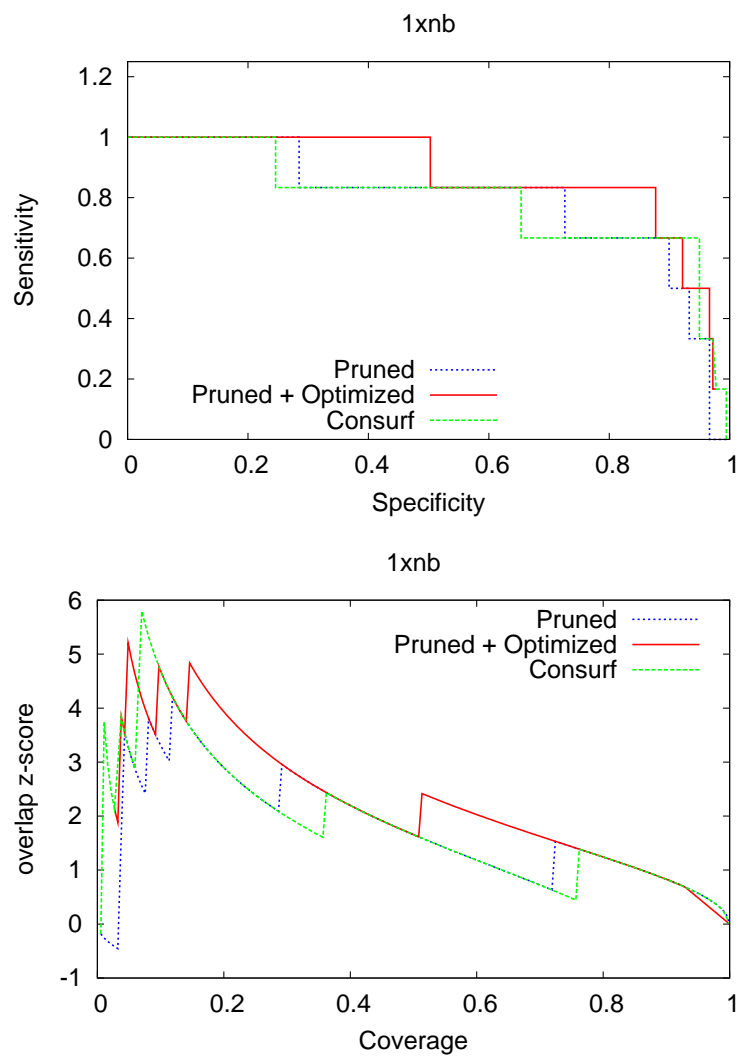

Figure 164: a) The sensitivity and specificity is shown for the pruned, pruned + optimized and the comparison method Consurf for PDBID 1xnb. b) The overlap z-scores as a function of rank coverage for the three methods is shown.

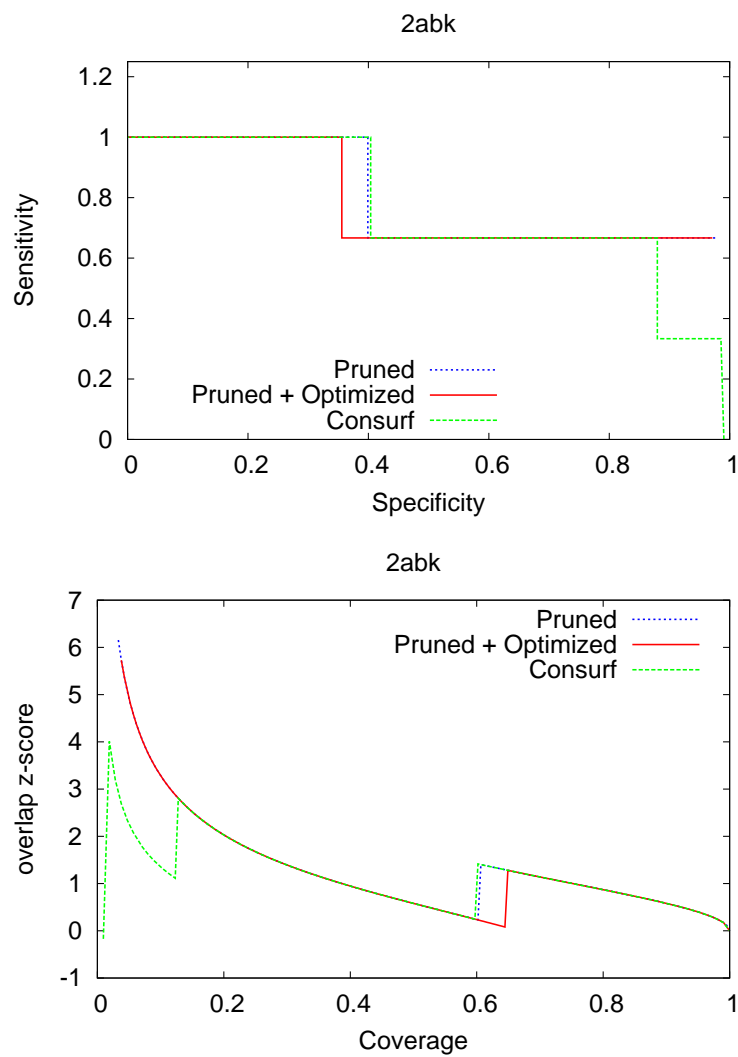

Figure 165: a) The sensitivity and specificity is shown for the pruned, pruned + optimized and the comparison method Consurf for PDBID 2abk. b) The overlap z-scores as a function of rank coverage for the three methods is shown.



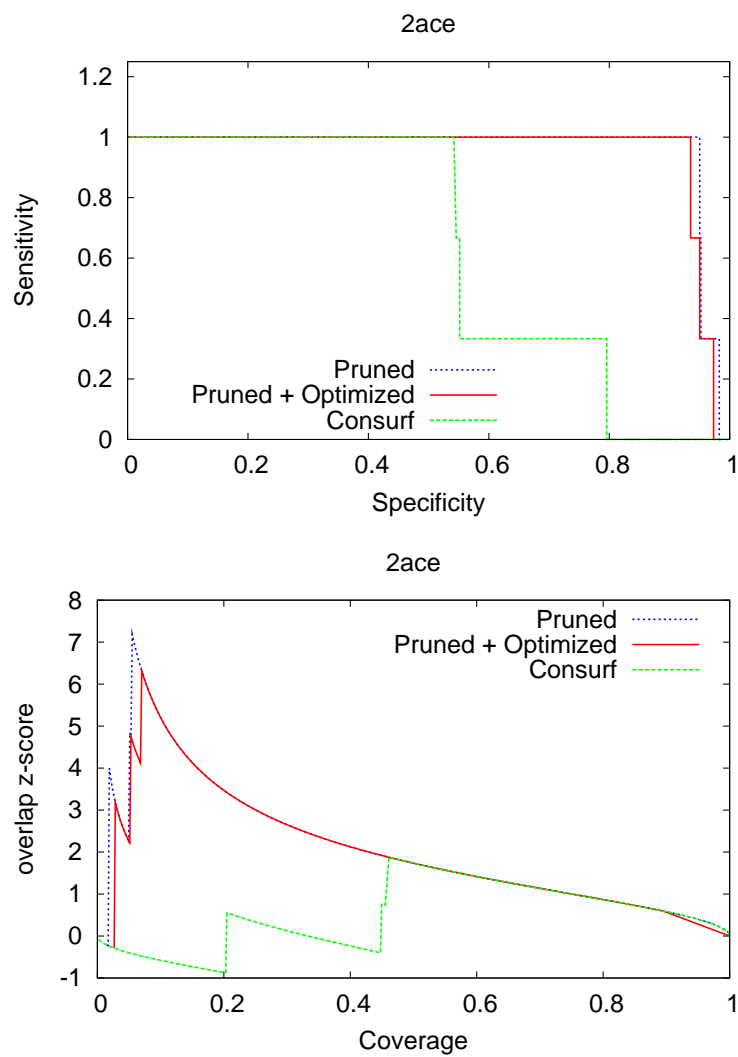

Figure 166: a) The sensitivity and specificity is shown for the pruned, pruned + optimized and the comparison method Consurf for PDBID 2ace. b) The overlap z-scores as a function of rank coverage for the three methods is shown.

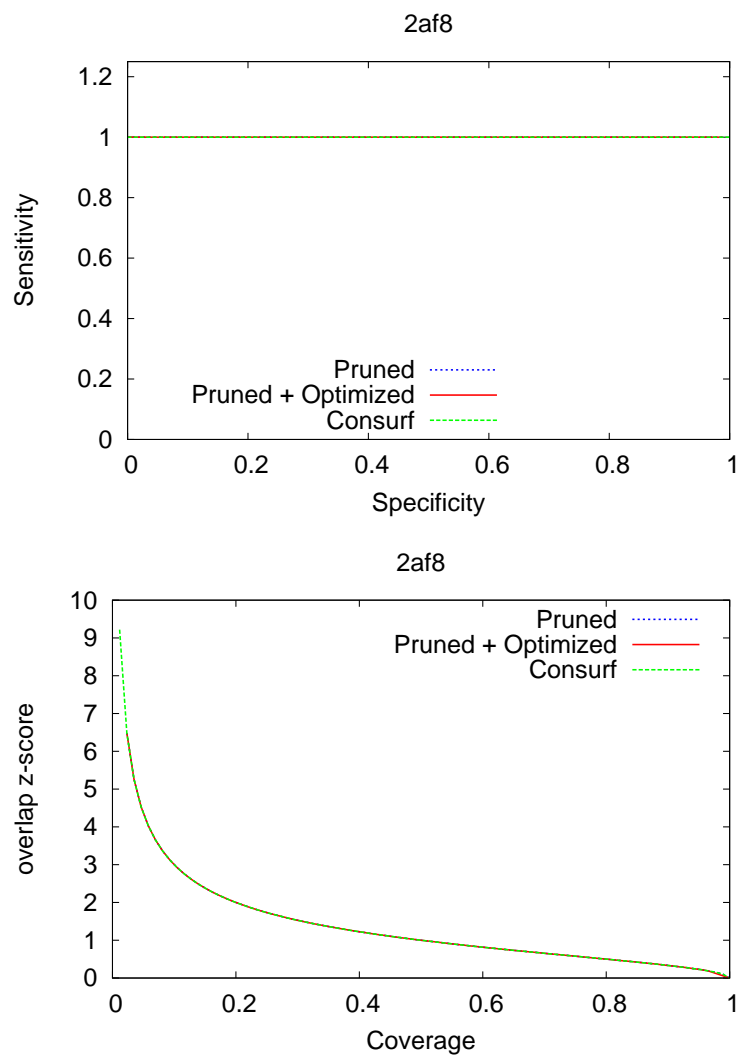

Figure 167: a) The sensitivity and specificity is shown for the pruned, pruned + optimized and the comparison method Consurf for PDBID 2af8. b) The overlap z-scores as a function of rank coverage for the three methods is shown.

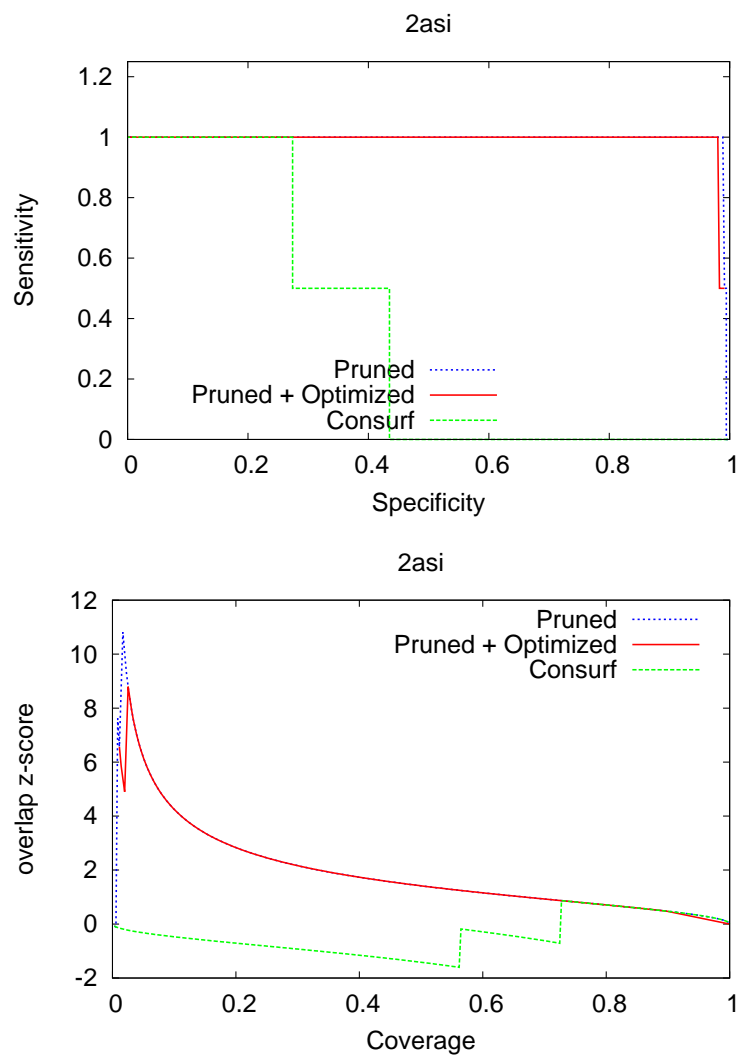

Figure 168: a) The sensitivity and specificity is shown for the pruned, pruned + optimized and the comparison method Consurf for PDBID 2asi. b) The overlap z-scores as a function of rank coverage for the three methods is shown.

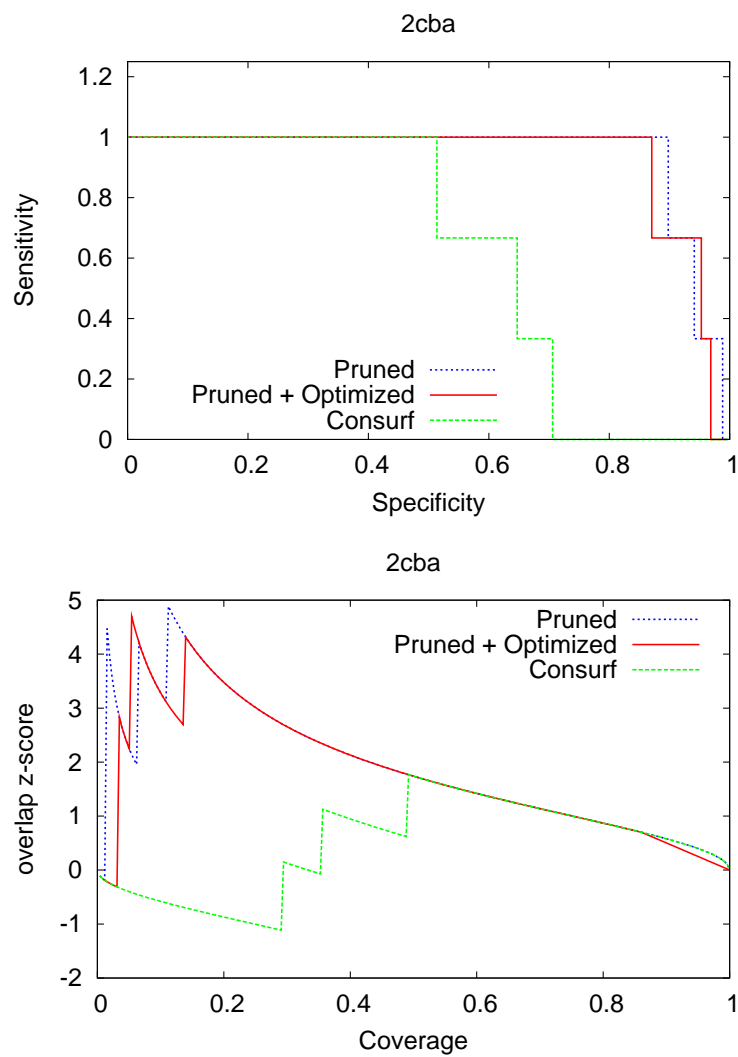

Figure 169: a) The sensitivity and specificity is shown for the pruned, pruned + optimized and the comparison method Consurf for PDBID 2cba. b) The overlap z-scores as a function of rank coverage for the three methods is shown.

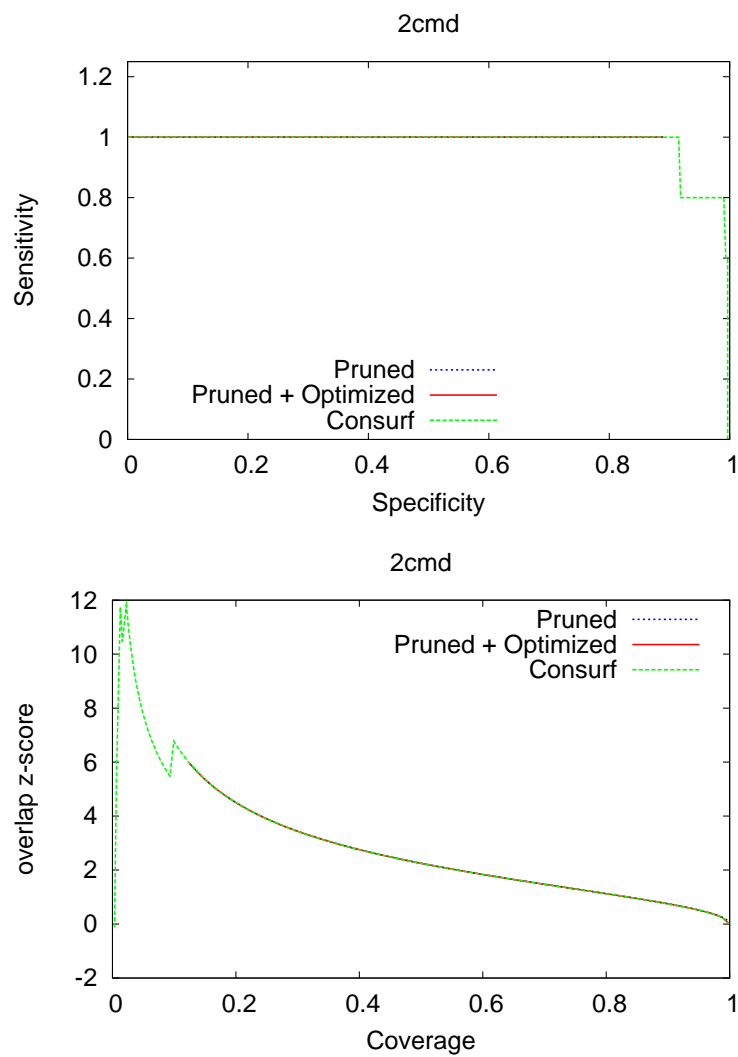

Figure 170: a) The sensitivity and specificity is shown for the pruned, pruned + optimized and the comparison method Consurf for PDBID 2cmd. b) The overlap z-scores as a function of rank coverage for the three methods is shown.

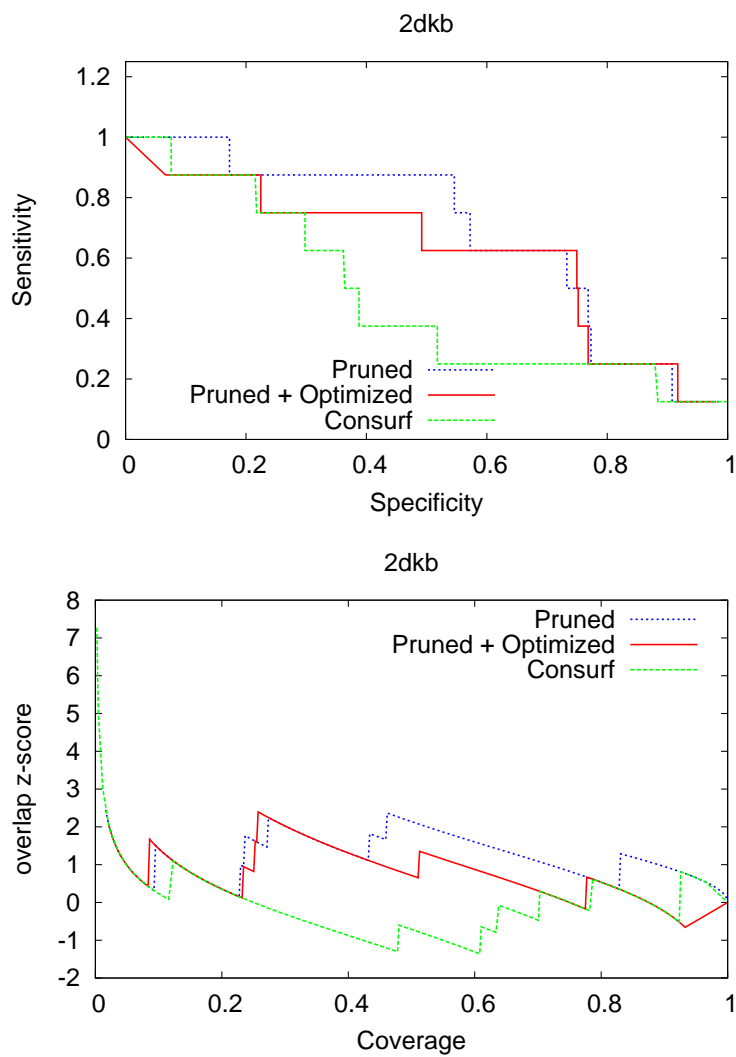

Figure 171: a) The sensitivity and specificity is shown for the pruned, pruned + optimized and the comparison method Consurf for PDBID 2dkb. b) The overlap z-scores as a function of rank coverage for the three methods is shown.

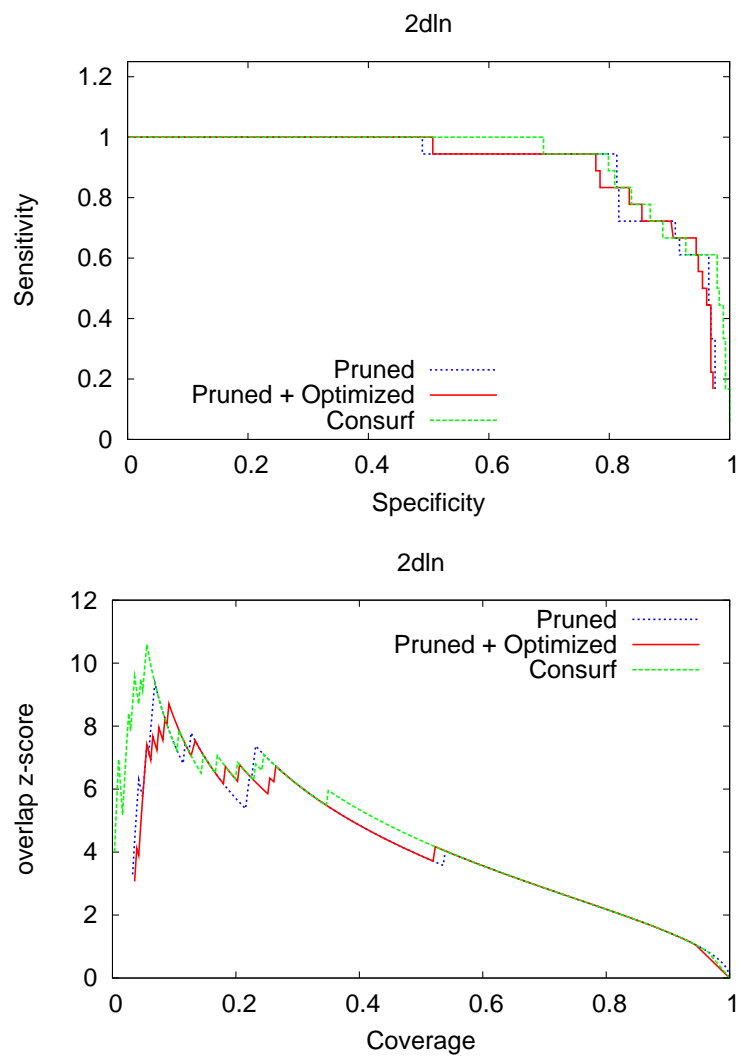

Figure 172: a) The sensitivity and specificity is shown for the pruned, pruned + optimized and the comparison method Consurf for PDBID 2dln. b) The overlap z-scores as a function of rank coverage for the three methods is shown.

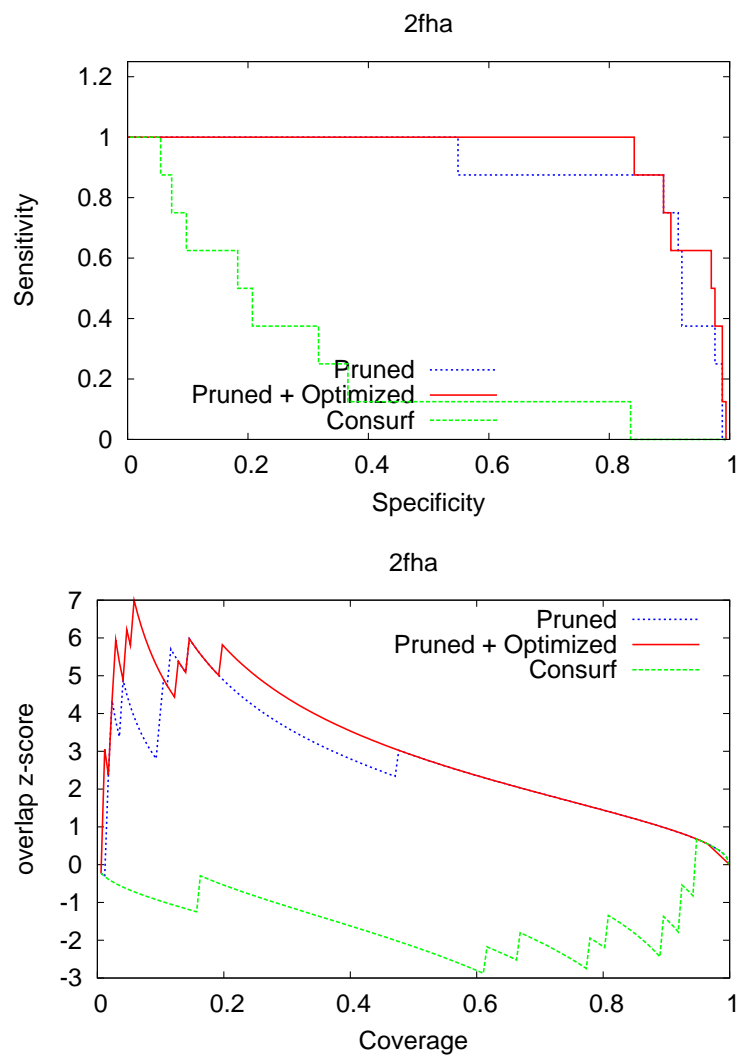

Figure 173: a) The sensitivity and specificity is shown for the pruned, pruned + optimized and the comparison method Consurf for PDBID 2fha. b) The overlap z-scores as a function of rank coverage for the three methods is shown.



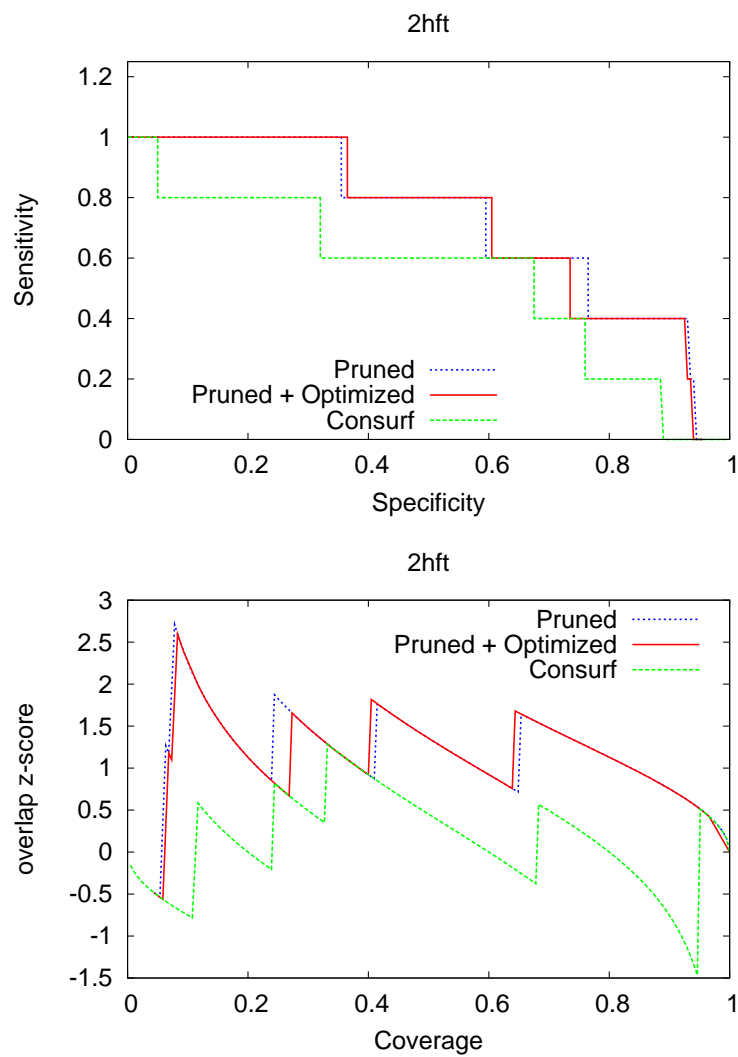

Figure 174: a) The sensitivity and specificity is shown for the pruned, pruned + optimized and the comparison method Consurf for PDBID 2hft. b) The overlap z-scores as a function of rank coverage for the three methods is shown.

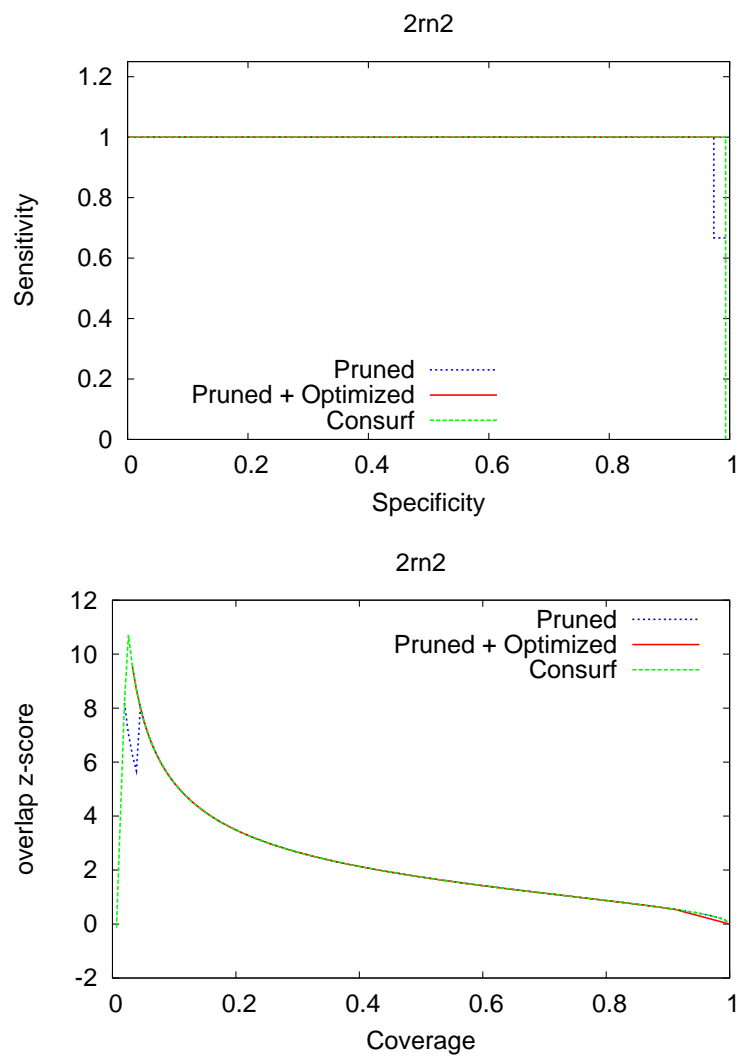

Figure 175: a) The sensitivity and specificity is shown for the pruned, pruned + optimized and the comparison method Consurf for PDBID 2rn2. b) The overlap z-scores as a function of rank coverage for the three methods is shown.

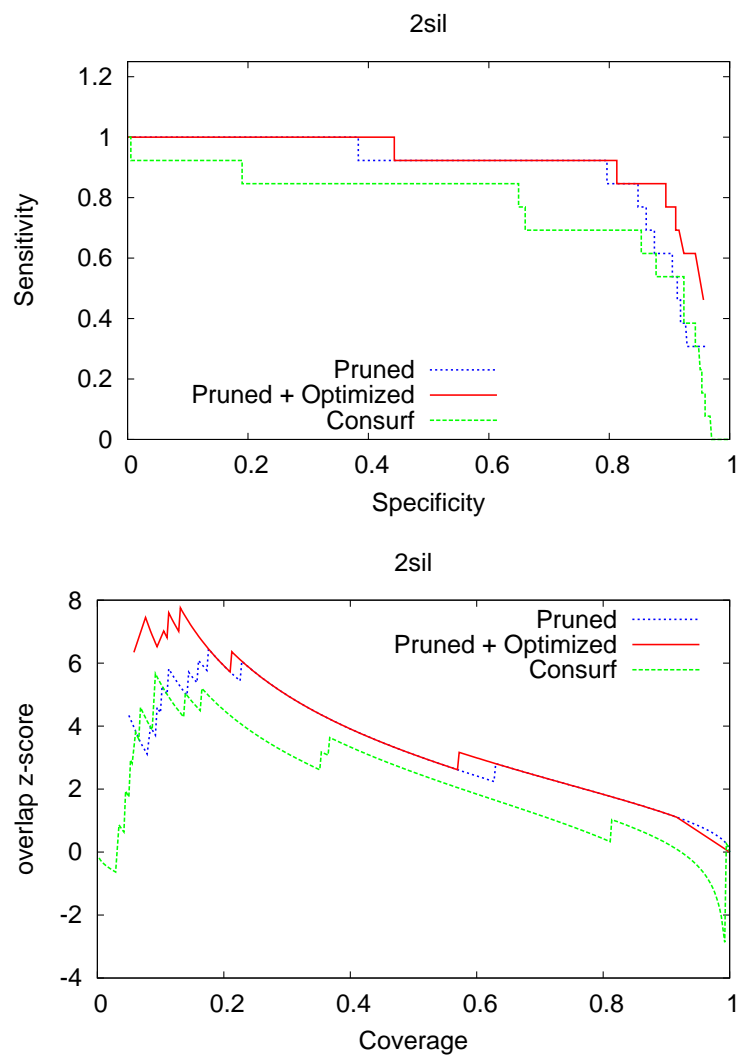

Figure 176: a) The sensitivity and specificity is shown for the pruned, pruned + optimized and the comparison method Consurf for PDBID 2sil. b) The overlap z-scores as a function of rank coverage for the three methods is shown.

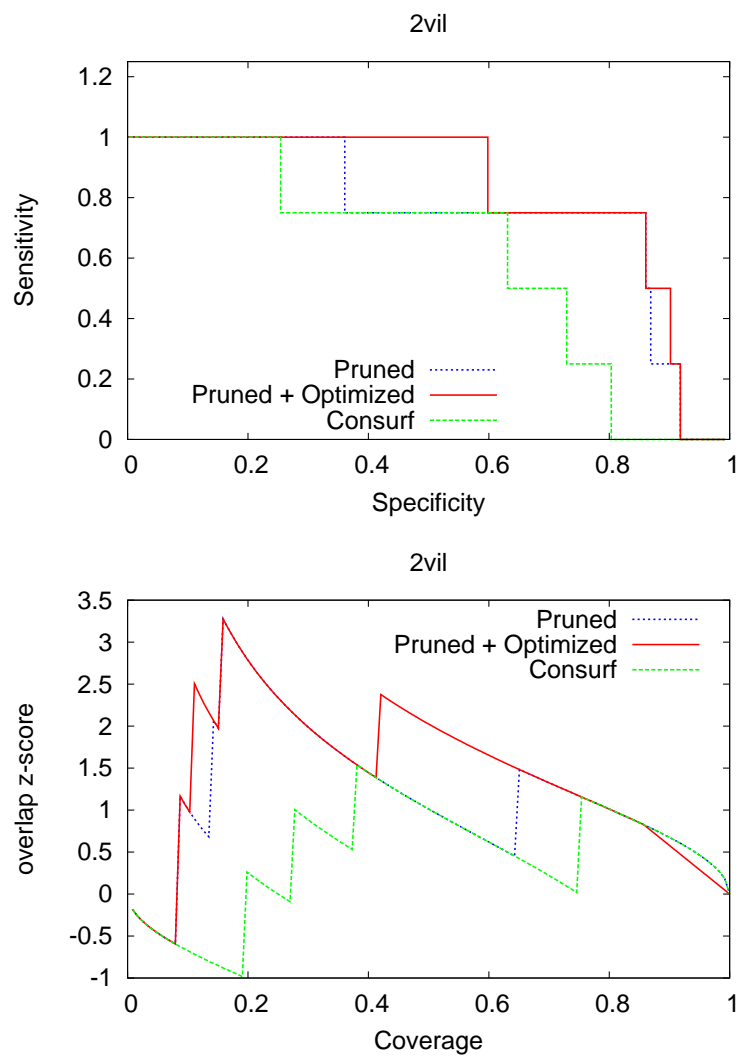

Figure 177: a) The sensitivity and specificity is shown for the pruned, pruned + optimized and the comparison method Consurf for PDBID 2vil. b) The overlap z-scores as a function of rank coverage for the three methods is shown.

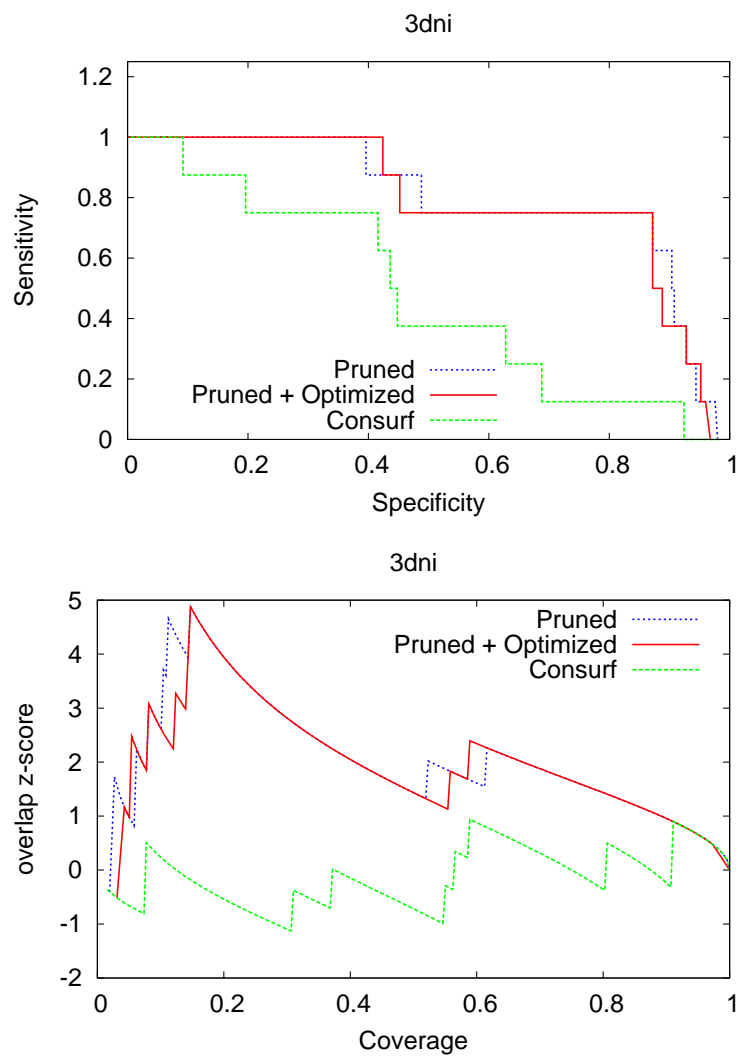

Figure 178: a) The sensitivity and specificity is shown for the pruned, pruned + optimized and the comparison method Consurf for PDBID 3dni. b) The overlap z-scores as a function of rank coverage for the three methods is shown.

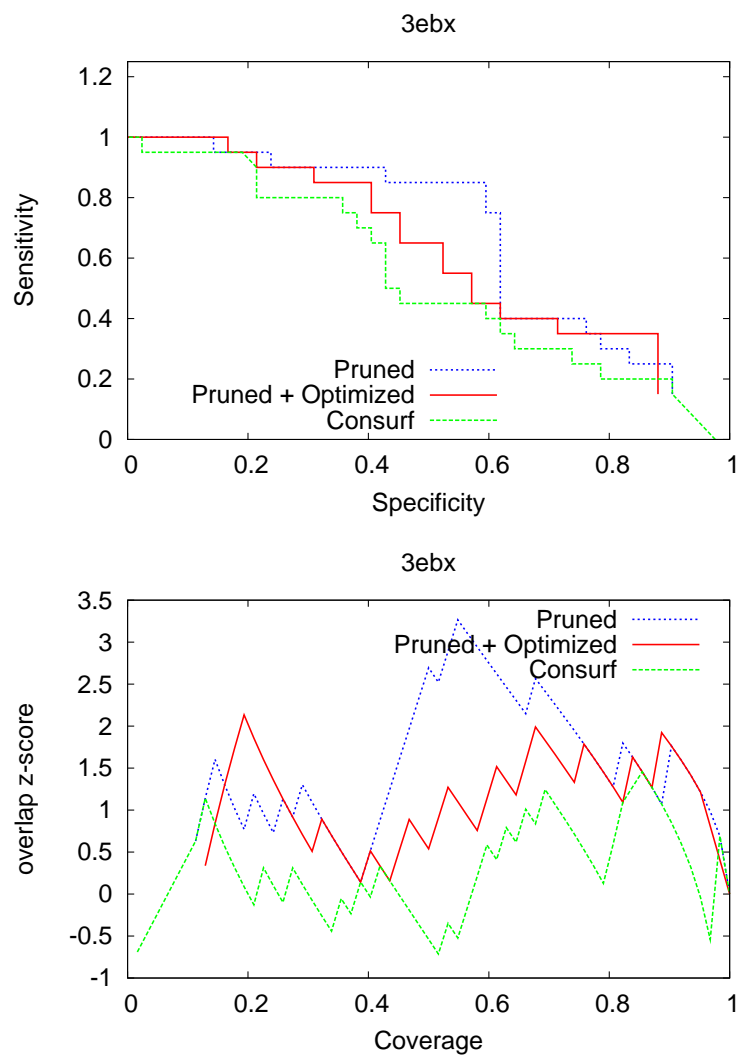

Figure 179: a) The sensitivity and specificity is shown for the pruned, pruned + optimized and the comparison method Consurf for PDBID 3ebx. b) The overlap z-scores as a function of rank coverage for the three methods is shown.

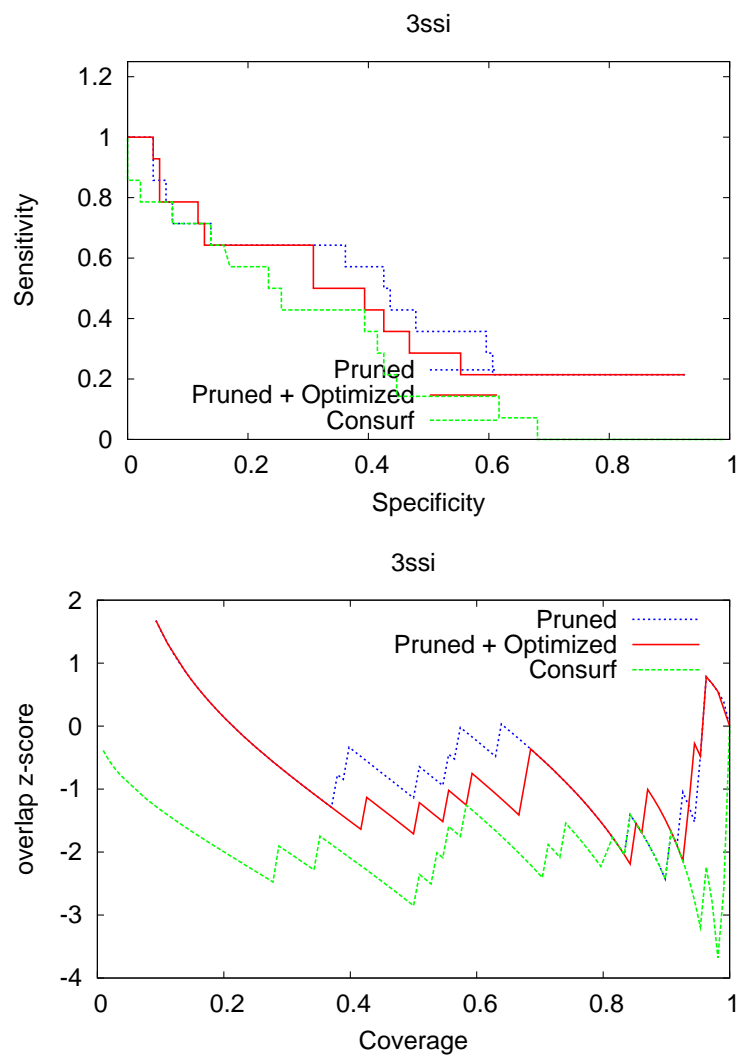

Figure 180: a) The sensitivity and specificity is shown for the pruned, pruned + optimized and the comparison method Consurf for PDBID 3ssi. b) The overlap z-scores as a function of rank coverage for the three methods is shown.

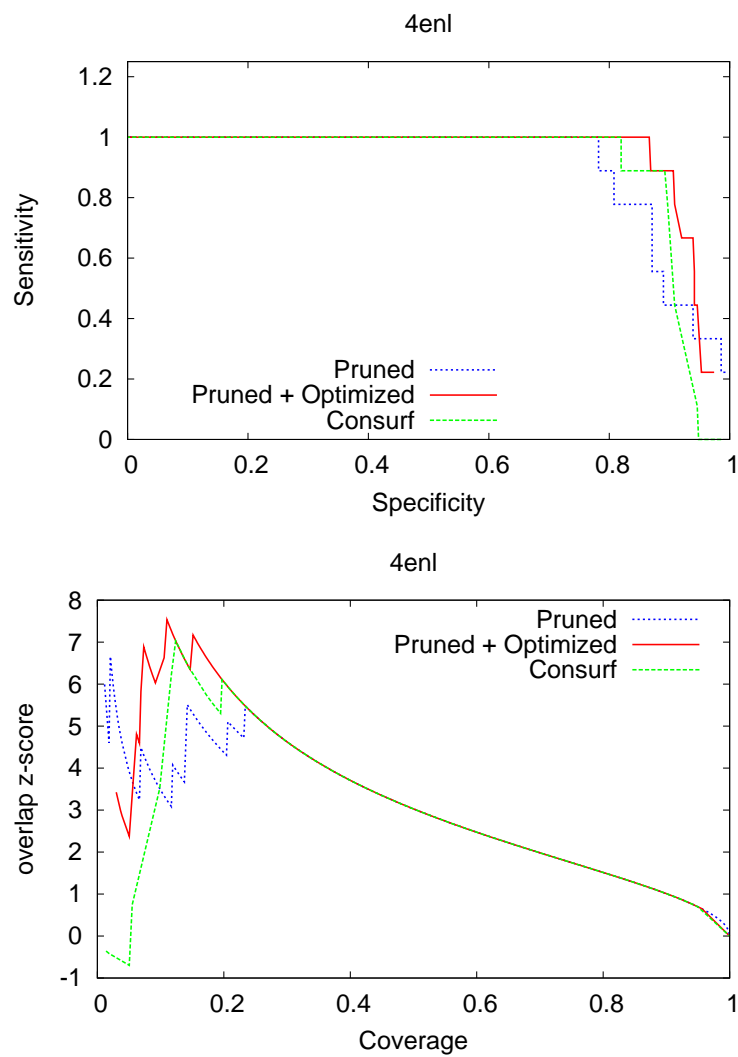

Figure 181: a) The sensitivity and specificity is shown for the pruned, pruned + optimized and the comparison method Consurf for PDBID 4enl. b) The overlap z-scores as a function of rank coverage for the three methods is shown.



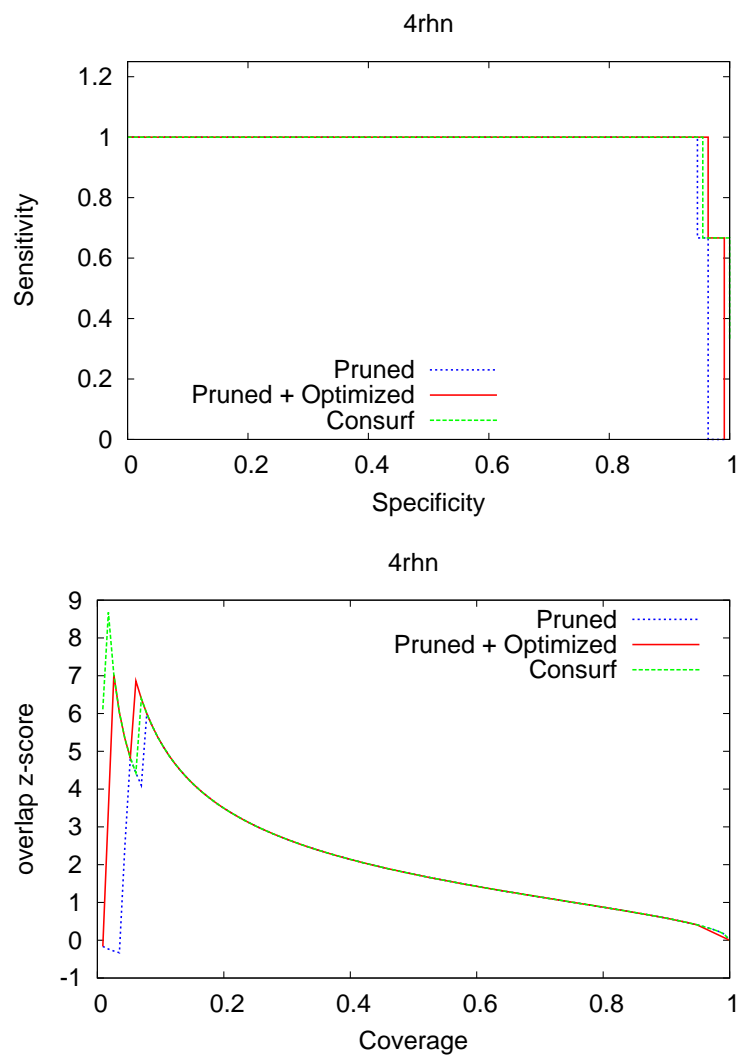

Figure 182: a) The sensitivity and specificity is shown for the pruned, pruned + optimized and the comparison method Consurf for PDBID 4rhn. b) The overlap z-scores as a function of rank coverage for the three methods is shown.

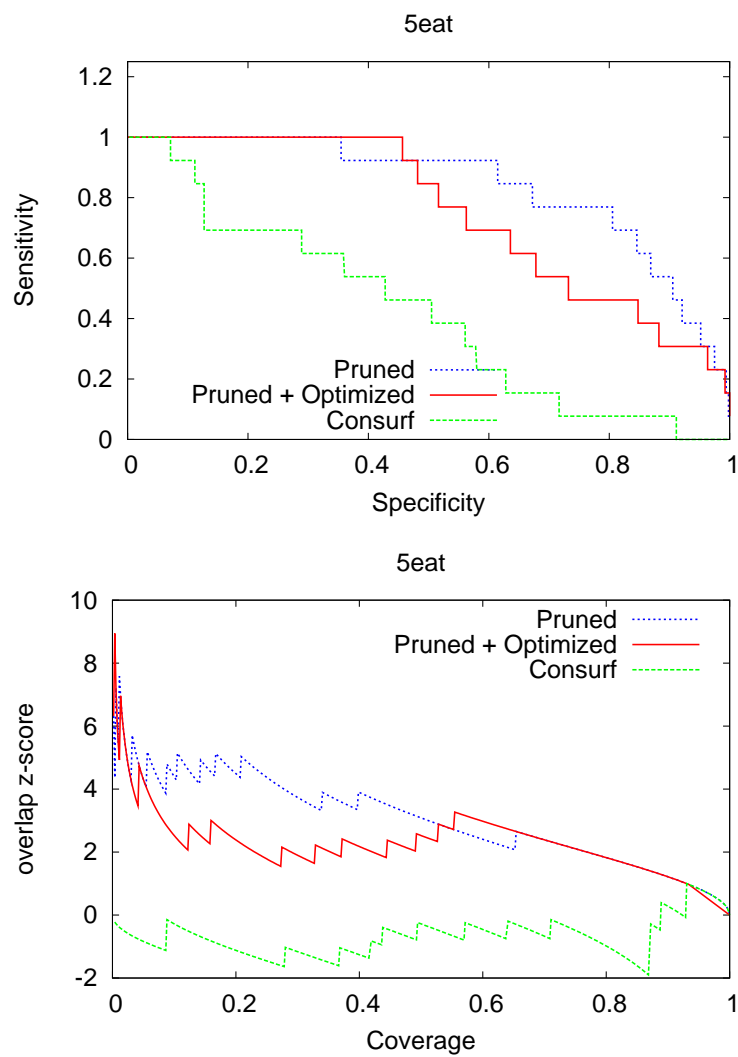

Figure 183: a) The sensitivity and specificity is shown for the pruned, pruned + optimized and the comparison method Consurf for PDBID 5eat. b) The overlap z-scores as a function of rank coverage for the three methods is shown.

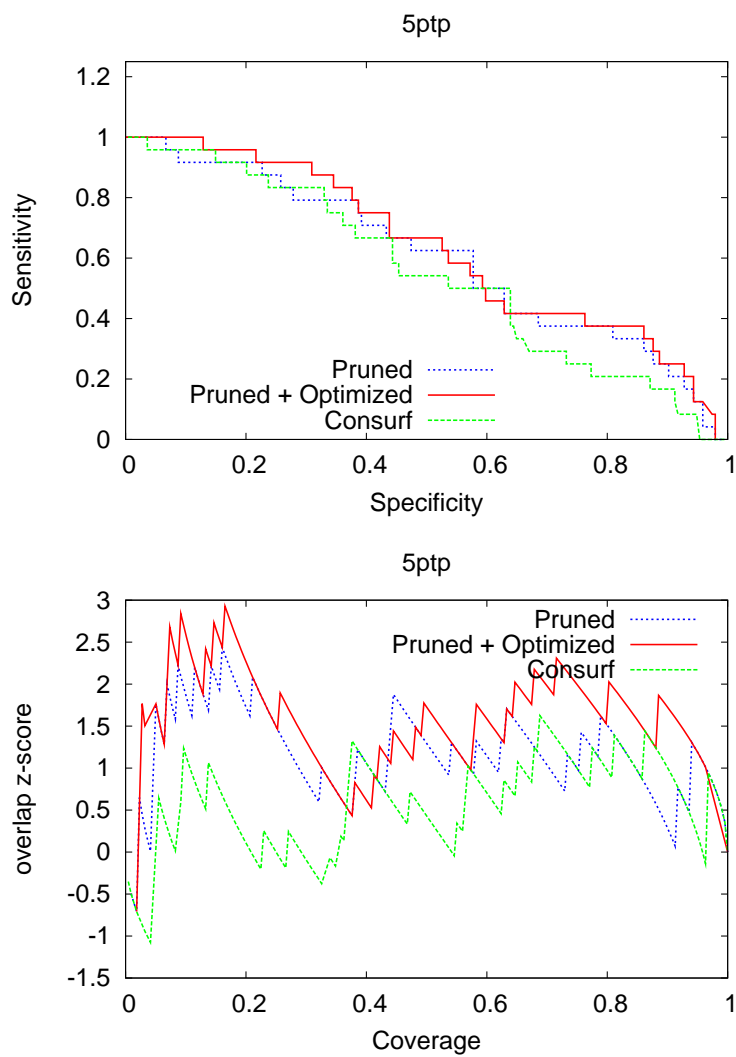

Figure 184: a) The sensitivity and specificity is shown for the pruned, pruned + optimized and the comparison method Consurf for PDBID 5ptp. b) The overlap z-scores as a function of rank coverage for the three methods is shown.

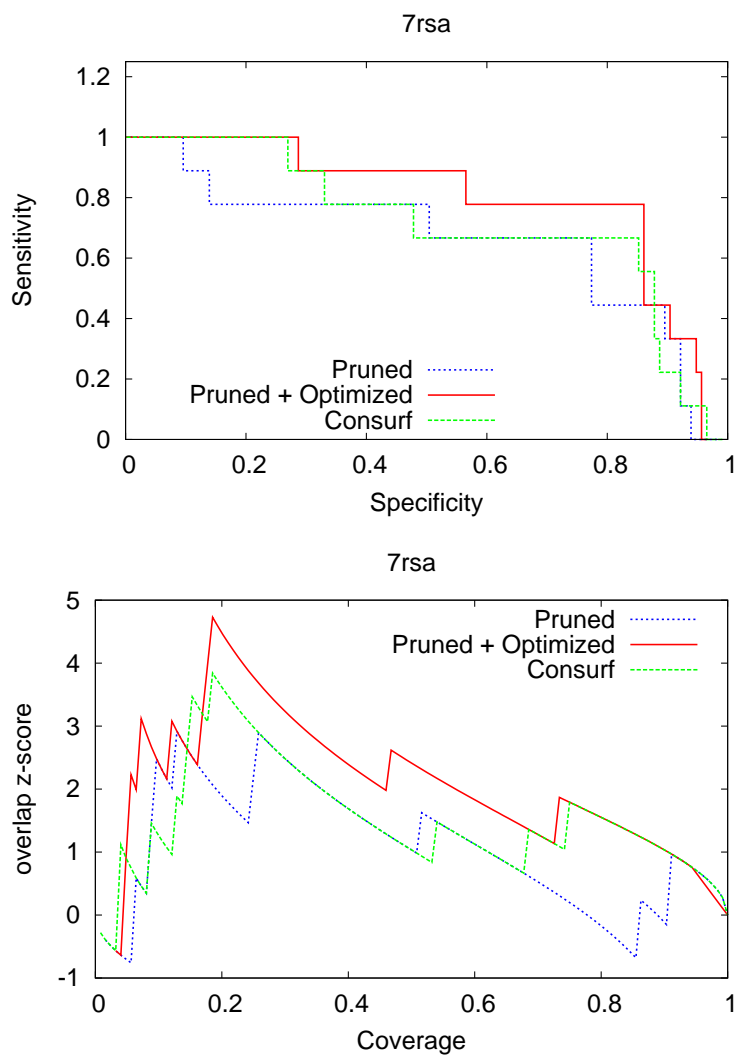

Figure 185: a) The sensitivity and specificity is shown for the pruned, pruned + optimized and the comparison method Consurf for PDBID 7rsa. b) The overlap z-scores as a function of rank coverage for the three methods is shown.
